# Supplementary material for: Prescribed Versus Taken Polypharmacy and Drug–Drug Interactions in Older Cardiovascular Patients during the COVID-19 Pandemic: Observational Cross-Sectional Analytical Study
Source: MDPI journal article supplement (doi:10.3390/jcm12155061), 2023-08-01
Supplement: s1 [file s1]

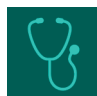

**Table S1.** Codes of International Statistical Classification of Diseases and Related Health Problems in the study cohort according to data of electronic health records in 2019–2022 ( $n = 704$ ).

| ICD   | Clinical condition                                                      | n* | ICD   | Clinical condition                                           | n* |
|-------|-------------------------------------------------------------------------|----|-------|--------------------------------------------------------------|----|
| A46   | Erysipelas                                                              | 1  | I70.2 | Atherosclerosis of native arteries of the extremities        | 20 |
| A84.9 | Tick-borne viral encephalitis                                           | 2  | I70.8 | Atherosclerosis of other arteries                            | 2  |
| C18.8 | Malignant neoplasm: Overlapping lesion of colon                         | 1  | I74.3 | Embolism and thrombosis of arteries of the lower extremities | 1  |
| C44.3 | Other malignant neoplasms: Skin of other and unspecified parts of face  | 1  | I83.9 | Asymptomatic varicose veins of lower extremities             | 4  |
| C50.3 | Malignant neoplasm: Lower-inner quadrant of breast                      | 1  | I95.8 | Other hypotension                                            | 1  |
| C50.9 | Malignant neoplasm: Breast, unspecified                                 | 4  | J00   | Acute nasopharyngitis [common cold]                          | 1  |
| C61   | Malignant neoplasm of prostate                                          | 3  | J02.9 | Acute pharyngitis, unspecified                               | 1  |
| C67.8 | Malignant neoplasm: Overlapping lesion of bladder                       | 4  | J06.8 | Other acute upper respiratory infections of multiple sites   | 10 |
| D12.0 | Benign neoplasm of cecum                                                | 1  | J06.9 | Acute upper respiratory infection, unspecified               | 15 |
| D24   | Benign neoplasm of breast                                               | 1  | J12.8 | Other viral pneumonia                                        | 11 |
| D40.0 | Neoplasm of uncertain or unknown behaviour: Prostate                    | 1  | J18.9 | Pneumonia, unspecified organism                              | 9  |
| D50.9 | Iron deficiency anemia, unspecified                                     | 7  | J20.9 | Acute bronchitis, unspecified                                | 1  |
| D64.8 | Other specified anemias                                                 | 1  | J31.1 | Chronic nasopharyngitis                                      | 1  |
| D64.9 | Anemia, unspecified                                                     | 4  | J40   | Bronchitis, not specified as acute or chronic                | 1  |
| D69.5 | Secondary thrombocytopenia                                              | 1  | J41.0 | Simple chronic bronchitis                                    | 2  |
| E01.8 | Other iodine-deficiency-related thyroid disorders and allied conditions | 1  | J42   | Unspecified chronic bronchitis                               | 2  |
| E04.1 | Nontoxic single thyroid nodule                                          | 2  | J44.8 | Other specified chronic obstructive pulmonary disease        | 4  |
| E04.2 | Nontoxic multinodular goiter                                            | 3  | J44.9 | Chronic obstructive pulmonary disease                        | 4  |
| E05.9 | Thyrotoxicosis, unspecified                                             | 1  | J45.8 | Mixed asthma                                                 | 7  |
| E06.3 | Autoimmune thyroiditis                                                  | 8  | K20   | Esophagitis                                                  | 1  |
| E06.5 | Other chronic thyroiditis                                               | 2  | K21.0 | Gastro-oesophageal reflux disease with oesophagitis          | 3  |
| E10.7 | Insulin-dependent diabetes mellitus: With multiple complications        | 1  | K21.9 | Gastro-oesophageal reflux disease without oesophagitis       | 1  |
| E11.3 | Type 2 diabetes mellitus With ophthalmic complications                  | 1  | K26.7 | Chronic duodenal ulcer without hemorrhage or perforation     | 2  |
| E11.4 | Type 2 diabetes mellitus With neurological complications                | 1  | K29.3 | Chronic superficial gastritis                                | 3  |
| E11.6 | Type 2 diabetes mellitus With other specified                           | 1  | K29.4 | Chronic atrophic gastritis                                   | 1  |

|               |                                                                              |    |       |                                                                 |
|---------------|------------------------------------------------------------------------------|----|-------|-----------------------------------------------------------------|
| complications |                                                                              |    |       |                                                                 |
| E11.7         | Type 2 diabetes mellitus With multiple complications                         | 32 | K29.5 | Chronic gastritis, unspecified 1                                |
| E11.8         | Type 2 diabetes mellitus with unspecified complications                      | 6  | K29.7 | Gastritis, unspecified 2                                        |
| E11.9         | Type 2 diabetes mellitus without complications                               | 7  | K29.9 | Gastroduodenitis, unspecified 9                                 |
| E16.8         | Other specified disorders of pancreatic internal secretion                   | 6  | K31.7 | Polyp of stomach and duodenum 2                                 |
| E66.0         | Obesity due to excess calories                                               | 2  | K31.9 | Disease of stomach and duodenum, unspecified 5                  |
| E66.8         | Other obesity                                                                | 3  | K56.5 | Intestinal adhesions [bands] with obstruction (postinfection) 1 |
| E78.0         | Pure hypercholesterolemia                                                    | 1  | K58.9 | Irritable bowel syndrome without diarrhea 1                     |
| E78.8         | Other disorders of lipoprotein metabolism                                    | 2  | K59.0 | Constipation 2                                                  |
| E79.0         | Hyperuricemia without signs of inflammatory arthritis and tophaceous disease | 2  | K62.0 | Anal polyp 1                                                    |
| F06.4         | Anxiety disorder due to known physiological condition                        | 1  | K64.1 | Second degree hemorrhoids 1                                     |
| F43.2         | Adjustment disorders                                                         | 1  | K64.8 | Other hemorrhoids 2                                             |
| G20           | Parkinson's disease                                                          | 1  | K76.0 | Fatty (change of) liver, not elsewhere classified 3             |
| G44.2         | Cluster headache syndrome                                                    | 1  | K80.1 | Calculus of gallbladder with other cholecystitis 4              |
| G50.0         | Trigeminal neuralgia                                                         | 1  | K80.2 | Calculus of gallbladder without cholecystitis 1                 |
| G52.8         | Paralytic syndrome, unspecified                                              | 1  | K80.3 | Calculus of bile duct with cholangitis 1                        |
| G56.0         | Carpal tunnel syndrome                                                       | 1  | K80.8 | Other cholelithiasis 1                                          |
| G62.8         | Other specified polyneuropathies                                             | 1  | K81.1 | Chronic cholecystitis 2                                         |
| G63.2         | Diabetic polyneuropathy                                                      | 2  | K81.9 | Cholecystitis, unspecified 1                                    |
| G93.8         | Other specified disorders of brain                                           | 2  | K83.1 | Obstruction of bile duct 1                                      |
| H20.8         | Other iridocyclitis                                                          | 1  | K85.0 | Idiopathic acute pancreatitis 1                                 |
| H25.0         | Age-related incipient cataract                                               | 1  | K85.1 | Biliary acute pancreatitis 1                                    |
| H25.1         | Age-related nuclear cataract                                                 | 1  | K85.9 | Acute pancreatitis, unspecified 1                               |
| H25.8         | Other age-related cataract                                                   | 7  | K86.1 | Other chronic pancreatitis 5                                    |
| H26.2         | Complicated Cataract                                                         | 2  | K91.5 | Postcholecystectomy syndrome 2                                  |
| H35.0         | Background retinopathy and retinal vascular changes                          | 1  | L30.9 | Dermatitis, unspecified 1                                       |
| H35.3         | Degeneration of macula and posterior pole                                    | 1  | L71.9 | Rosacea, unspecified 2                                          |
| H40.1         | Primary open-angle glaucoma                                                  | 1  | M10.0 | Idiopathic gout 1                                               |
| H40.5         | Glaucoma secondary to other eye disorders                                    | 1  | M15.0 | Primary generalized (osteo)arthritis 4                          |
| H40.8         | Other glaucoma                                                               | 1  | M15.8 | Other polyosteoarthritis 2                                      |
| H43.1         | Vitreous hemorrhage                                                          | 1  | M15.9 | Polyosteoarthritis, unspecified 1                               |

|       |                                                                                                         |     |       |                                                          |    |
|-------|---------------------------------------------------------------------------------------------------------|-----|-------|----------------------------------------------------------|----|
| H43.3 | Vitreous prolapse, bilateral                                                                            | 2   | M17.0 | Primary gonarthrosis, bilateral                          | 4  |
| H47.2 | Optic atrophy                                                                                           | 2   | M17.2 | Bilateral post-traumatic osteoarthritis of knee          | 1  |
| H52.1 | Myopia                                                                                                  | 2   | M17.3 | Unilateral post-traumatic osteoarthritis of knee         | 1  |
| H60.5 | Acute otitis externa, noninfective                                                                      | 1   | M17.9 | Osteoarthritis of knee, unspecified                      | 2  |
| H60.9 | Unspecified otitis externa                                                                              | 1   | M19.8 | Other specified arthrosis                                | 3  |
| H90.3 | Sensorineural hearing loss, bilateral                                                                   | 3   | M42.1 | Adult osteochondrosis of spine                           | 10 |
| I05.0 | Rheumatic mitral stenosis                                                                               | 1   | M42.9 | Spinal osteochondrosis, unspecified                      | 1  |
| I05.1 | Rheumatic mitral insufficiency                                                                          | 1   | M50.3 | Other cervical disc degeneration                         | 1  |
| I08.0 | Rheumatic disorders of both mitral and aortic valves                                                    | 1   | M53.0 | Cervicocranial syndrome                                  | 2  |
| I10   | Essential (primary) hypertension                                                                        | 4   | M53.1 | Cervicobrachial syndrome                                 | 2  |
| I11   | Hypertensive heart disease with heart failure                                                           | 1   | M54.2 | Cervicalgia                                              | 3  |
| I11.0 | Hypertensive heart disease with (congestive) heart failure                                              | 5   | M54.4 | Lumbago with sciatica                                    | 4  |
| I11.9 | Hypertensive heart disease without (congestive) heart failure                                           | 108 | M54.5 | Low Back Pain                                            | 1  |
| I12.0 | Hypertensive chronic kidney disease with stage 2<br>5 chronic kidney disease or end stage renal disease | 2   | M54.6 | Pain in thoracic spine                                   | 1  |
| I13.2 | Hypertensive heart and renal disease with both (congestive) heart failure and renal failure             | 1   | M65.9 | Synovitis and tenosynovitis, unspecified                 | 1  |
| I20.0 | Unstable angina pectoris                                                                                | 5   | M79.2 | Neuralgia and neuritis, unspecified                      | 1  |
| I20.1 | Angina pectoris with documented spasm                                                                   | 2   | M81.8 | Other osteoporosis without current pathological fracture | 1  |
| I20.8 | Other forms of angina pectoris                                                                          | 153 | N10   | Acute pyelonephritis                                     | 1  |
| I20.9 | Angina pectoris, unspecified                                                                            | 2   | N11.0 | Nonobstructive reflux-associated chronic pyelonephritis  | 3  |
| I21.0 | Acute transmural myocardial infarction of anterior wall                                                 | 9   | N11.8 | Other chronic tubulo-interstitial nephritis              | 4  |
| I21.1 | Acute transmural myocardial infarction of inferior wall                                                 | 2   | N11.9 | Chronic tubulo-interstitial nephritis, unspecified       | 1  |
| I21.9 | ST elevation (STEMI) myocardial infarction involving other coronary artery of anterior wall             | 1   | N18.2 | Chronic kidney disease, stage 2 (mild)                   | 8  |
| I22.0 | Subsequent ST elevation (STEMI) myocardial infarction of anterior wall                                  | 1   | N18.3 | Chronic kidney disease, stage 3 (moderate)               | 5  |
| I22.1 | Subsequent myocardial infarction of inferior wall                                                       | 2   | N18.4 | Chronic kidney disease, stage 4 (severe)                 | 1  |
| I22.9 | ST elevation (STEMI) myocardial infarction of unspecified site                                          | 1   | N18.5 | Chronic kidney disease, stage 5                          | 1  |

|       |                                                                                   |    |       |                                                                                 |    |
|-------|-----------------------------------------------------------------------------------|----|-------|---------------------------------------------------------------------------------|----|
| I25.0 | Chronic ischaemic heart disease, unspecified                                      | 4  | N18.9 | Chronic kidney disease, unspecified                                             | 1  |
| I25.1 | Atherosclerotic heart disease of native coronary artery                           | 11 | N20.9 | Urinary calculus, unspecified                                                   | 1  |
| I25.2 | Old myocardial infarction                                                         | 39 | N28.1 | Cyst of kidney, acquired                                                        | 1  |
| I25.8 | Other forms of chronic ischemic heart disease                                     | 27 | N30.0 | Acute cystitis                                                                  | 1  |
| I25.9 | Chronic ischaemic heart disease, unspecified                                      | 9  | N30.1 | Interstitial cystitis (chronic)                                                 | 1  |
| I35.2 | Aortic (valve) stenosis with insufficiency                                        | 1  | N30.2 | Other chronic cystitis                                                          | 1  |
| I42.0 | Dilated cardiomyopathy                                                            | 1  | N30.8 | Other cystitis                                                                  | 1  |
| I42.8 | Other cardiomyopathies                                                            | 1  | N30.9 | Cystitis, unspecified                                                           | 2  |
| I44.0 | Atrioventricular block, first degree                                              | 6  | N39.4 | Other specified urinary incontinence                                            | 1  |
| I44.1 | Atrioventricular block, second degree                                             | 2  | N40   | Benign prostatic hyperplasia                                                    | 12 |
| I44.2 | Atrioventricular block                                                            | 1  | N41.3 | Prostatocystitis                                                                | 1  |
| I44.6 | Other and unspecified fascicular block                                            | 1  | N60.8 | Other benign mammary dysplasias                                                 | 1  |
| I47.1 | Supraventricular (paroxysmal) tachycardia                                         | 1  | R16.0 | Hepatomegaly, not elsewhere classified                                          | 1  |
| I47.2 | Ventricular tachycardia                                                           | 2  | R31   | Unspecified haematuria                                                          | 2  |
| I48.0 | Paroxysmal atrial fibrillation                                                    | 15 | R51   | Headache                                                                        | 1  |
| I48.1 | Persistent atrial fibrillation                                                    | 4  | R52.9 | Pain, unspecified                                                               | 1  |
| I48.2 | Chronic atrial fibrillation                                                       | 2  | R63.5 | Abnormal weight gain                                                            | 1  |
| I48.9 | Atrial fibrillation and atrial flutter, unspecified                               | 5  | R73.9 | Hyperglycemia, unspecified                                                      | 2  |
| I49.3 | Ventricular premature depolarization                                              | 1  | S00.0 | Superficial injury of scalp                                                     | 1  |
| I49.5 | Sick sinus syndrome                                                               | 3  | U07.1 | COVID-19, virus identified                                                      | 11 |
| I49.8 | Cardiac arrhythmia, unspecified                                                   | 1  | U07.2 | COVID-19, virus not identified                                                  | 1  |
| I50.0 | Congestive heart failure                                                          | 5  | U11.9 | Need for immunization against COVID-19, unspecified                             | 1  |
| I50.1 | Left ventricular failure, unspecified                                             | 1  | Z00.0 | Encounter for general adult medical examination                                 | 2  |
| I50.9 | Heart failure, unspecified                                                        | 2  | Z00.8 | Encounter for other general examination                                         | 2  |
| I51   | Complications and ill-defined descriptions of heart disease                       | 1  | Z01.8 | Encounter for other specified special examinations                              | 2  |
| I63.5 | Cerebral infarction due to unspecified occlusion or stenosis of cerebral arteries | 5  | Z03.1 | Observation for suspected malignant neoplasm                                    | 1  |
| I67.2 | Cerebral atherosclerosis                                                          | 1  | Z03.8 | Encounter for observation for other suspected diseases and conditions ruled out | 4  |
| I67.4 | Hypertensive encephalopathy                                                       | 1  | Z25.1 | Need for immunization against influenza                                         | 1  |
| I67.8 | Other specified cerebrovascular diseases                                          | 55 | Z76.0 | Encounter for issue of repeat prescription                                      | 3  |
| I67.9 | Cerebrovascular disease, unspecified                                              | 9  | Z96.1 | Presence of intraocular lens                                                    | 4  |
| I70.0 | Atherosclerosis of aorta                                                          | 3  |       |                                                                                 |    |

\*n — number of patients with given ICD code in electronic health records in 2019-2022.

**Table S2.** The detailed explanation of the entire list of pairwise serious drug-drug interactions among taken drugs in the cohort of cardiovascular patients based on data of electronic health records in 2019-2022 ( $n = 704$ ).

| Drug combination           | n  | Serious drug-drug interactions (T-List)                                                                                                                                                                                                                                                                                                                                                                                                                     |
|----------------------------|----|-------------------------------------------------------------------------------------------------------------------------------------------------------------------------------------------------------------------------------------------------------------------------------------------------------------------------------------------------------------------------------------------------------------------------------------------------------------|
| aspirin + perindopril      | 25 | Aspirin, perindopril. Pharmacodynamic antagonism. Avoid or Use Alternate Drug. Co-administration may result in a significant decrease in renal function. NSAIDs may diminish the antihypertensive effect of ACE inhibitors. The mechanism of these interactions is likely related to the ability of NSAIDs to reduce the synthesis of vasodilating renal prostaglandins                                                                                     |
| aspirin + lisinopril       | 17 | Aspirin, lisinopril. Pharmacodynamic antagonism. Avoid or Use Alternate Drug. Co-administration may result in a significant decrease in renal function. NSAIDs may diminish the antihypertensive effect of ACE inhibitors. The mechanism of these interactions is likely related to the ability of NSAIDs to reduce the synthesis of vasodilating renal prostaglandins                                                                                      |
| amiodarone + indapamide    | 9  | Amiodarone and indapamide both increase QTc interval. Avoid or Use Alternate Drug                                                                                                                                                                                                                                                                                                                                                                           |
| aspirin + enalapril*       | 7  | Aspirin, enalapril. pharmacodynamic antagonism. Avoid or Use Alternate Drug. Co-administration may result in a significant decrease in renal function. NSAIDs may diminish the antihypertensive effect of ACE inhibitors. The mechanism of these interactions is likely related to the ability of NSAIDs to reduce the synthesis of vasodilating renal prostaglandins                                                                                       |
| bisoprolol + digoxin       | 7  | Bisoprolol increases effects of digoxin by pharmacodynamic synergism. Use Caution/Monitor. Enhanced bradycardia                                                                                                                                                                                                                                                                                                                                             |
| clopidogrel + omeprazole   | 7  | Omeprazole decreases effects of clopidogrel by affecting hepatic enzyme CYP2C19 metabolism. Avoid or Use Alternate Drug. Clopidogrel efficacy may be reduced by drugs that inhibit CYP2C19. Inhibition of platelet aggregation by clopidogrel is entirely due to an active metabolite. Clopidogrel is metabolized to this active metabolite in part by CYP2C19                                                                                              |
| ceftriaxone + enoxaparin   | 6  | Ceftriaxone increases effects of enoxaparin by anticoagulation. Avoid or Use Alternate Drug. cephalosporins may decrease prothrombin activity                                                                                                                                                                                                                                                                                                               |
| apixaban + clopidogrel     | 4  | Clopidogrel and apixaban both increase anticoagulation. Avoid or Use Alternate Drug                                                                                                                                                                                                                                                                                                                                                                         |
| digoxin + omeprazole       | 4  | Esomeprazole will increase the level or effect of digoxin by increasing gastric pH. Applies only to oral form of both agents. Avoid or Use Alternate Drug                                                                                                                                                                                                                                                                                                   |
| aspirin + ketorolac        | 3  | Aspirin, ketorolac. Either increases toxicity of the other by pharmacodynamic synergism. Contraindicated                                                                                                                                                                                                                                                                                                                                                    |
| potassium + spironolactone | 3  | Spironolactone and potassium chloride both increase serum potassium. Avoid or Use Alternate Drug                                                                                                                                                                                                                                                                                                                                                            |
| amiodarone + digoxin       | 2  | Amiodarone will increase the level or effect of digoxin by P-glycoprotein (MDR1) efflux transporter. Avoid or Use Alternate Drug. Amiodarone increases PO digoxin serum concentrations by ~70% and IV digoxin by ~17%; measure digoxin levels before initiating amiodarone and reduce PO digoxin dose by 30-50%; decrease IV digoxin dose by 15-30%. amiodarone will increase the level or effect of digoxin by basic (cationic) drug competition for renal |

|                             |   |                                                                                                                                                                                                                                                                                                                                                                          |
|-----------------------------|---|--------------------------------------------------------------------------------------------------------------------------------------------------------------------------------------------------------------------------------------------------------------------------------------------------------------------------------------------------------------------------|
|                             |   | tubular clearance. Avoid or Use Alternate Drug. Amiodarone increases PO digoxin serum concentrations by ~70% and IV digoxin by ~17%; measure digoxin levels before initiating amiodarone and reduce PO digoxin dose by 30-50%; decrease IV digoxin dose by 15-30%                                                                                                        |
| aspirin + fosinopril        | 2 | Aspirin, fosinopril. Pharmacodynamic antagonism. Avoid or Use Alternate Drug. Co-administration may result in a significant decrease in renal function. NSAIDs may diminish the antihypertensive effect of ACE inhibitors. The mechanism of these interactions is likely related to the ability of NSAIDs to reduce the synthesis of vasodilating renal prostaglandins   |
| captopril + losartan        | 2 | Losartan, captopril. Either increases toxicity of the other by pharmacodynamic synergism. Avoid or Use Alternate Drug. Dual blockade of renin-angiotensin system increases risks of hypotension, hyperkalemia, and renal impairment                                                                                                                                      |
| ceftriaxone + heparin       | 2 | Ceftriaxone will increase the level or effect of heparin by anticoagulation. Avoid or Use Alternate Drug. cephalosporins may decrease prothrombin activity                                                                                                                                                                                                               |
| clarithromycin + enoxaparin | 2 | Clarithromycin increases effects of enoxaparin by decreasing metabolism. Avoid or Use Alternate Drug                                                                                                                                                                                                                                                                     |
| digoxin + metoprolol        | 2 | Digoxin increases toxicity of metoprolol by unspecified interaction mechanism. Avoid or Use Alternate Drug. Can increase risk of bradycardia                                                                                                                                                                                                                             |
| ketorolac + lisinopril      | 2 | Ketorolac, lisinopril. pharmacodynamic antagonism. Avoid or Use Alternate Drug. Co-administration may result in a significant decrease in renal function. NSAIDs may diminish the antihypertensive effect of ACE inhibitors. The mechanism of these interactions is likely related to the ability of NSAIDs to reduce the synthesis of vasodilating renal prostaglandins |
| metoprolol + sotalol        | 2 | Metoprolol and sotalol both increase anti-hypertensive channel blocking. Avoid or Use Alternate Drug                                                                                                                                                                                                                                                                     |
| amiodarone + escitalopram   | 1 | Escitalopram increases toxicity of amiodarone by QTc interval. Avoid or Use Alternate Drug                                                                                                                                                                                                                                                                               |
| amiodarone + haloperidol    | 1 | Amiodarone and haloperidol both increase QTc interval. Avoid or Use Alternate Drug                                                                                                                                                                                                                                                                                       |
| amiodarone + levofloxacin   | 1 | Amiodarone and levofloxacin both increase QTc interval. Avoid or Use Alternate Drug                                                                                                                                                                                                                                                                                      |
| apixaban + enoxaparin       | 1 | Enoxaparin and apixaban both increase anticoagulation. Avoid or Use Alternate Drug                                                                                                                                                                                                                                                                                       |
| apixaban + rivaroxaban      | 1 | Rivaroxaban and apixaban both increase anticoagulation. Avoid or Use Alternate Drug                                                                                                                                                                                                                                                                                      |
| atenolol + sotalol          | 1 | Atenolol and sotalol both increase anti-hypertensive channel blocking. Avoid or Use Alternate Drug                                                                                                                                                                                                                                                                       |
| azithromycin + heparin      | 1 | Azithromycin increases effects of heparin by decreasing metabolism. Avoid or Use Alternate Drug                                                                                                                                                                                                                                                                          |
| bisoprolol + metoprolol     | 1 | Bisoprolol and metoprolol both increase anti-hypertensive channel blocking. Avoid or Use Alternate Drug                                                                                                                                                                                                                                                                  |

|                                |   |                                                                                                                                                                                                                                                                                                                                                                                                                                                      |
|--------------------------------|---|------------------------------------------------------------------------------------------------------------------------------------------------------------------------------------------------------------------------------------------------------------------------------------------------------------------------------------------------------------------------------------------------------------------------------------------------------|
| clarithromycin + dexamethasone | 1 | Clarithromycin will increase the level or effect of dexamethasone by affecting hepatic/intestinal enzyme CYP3A4 metabolism. Avoid or Use Alternate Drug                                                                                                                                                                                                                                                                                              |
| clopidogrel + morphine         | 1 | Morphine will decrease the level or effect of clopidogrel by Other (see comment). Avoid or Use Alternate Drug. Co-administration of opioid agonists delay and reduce absorption of clopidogrel, presumably because of slowed gastric emptying, resulting in reduced exposure to its metabolites; consider use of parenteral antiplatelet agents in acute coronary syndrome patients requiring co-administration of morphine or other opioid agonists |
| dalteparin + enoxaparin        | 1 | Dalteparin and enoxaparin both increase anticoagulation. Avoid or Use Alternate Drug                                                                                                                                                                                                                                                                                                                                                                 |
| diclofenac + enalapril         | 1 | Diclofenac, enalapril. pharmacodynamic antagonism. Avoid or Use Alternate Drug. Co-administration may result in a significant decrease in renal function. NSAIDs may diminish the antihypertensive effect of ACE inhibitors. The mechanism of these interactions is likely related to the ability of NSAIDs to reduce the synthesis of vasodilating renal prostaglandins                                                                             |
| diclofenac + ketorolac         | 1 | Diclofenac, ketorolac. Either increases toxicity of the other by pharmacodynamic synergism. Contraindicated                                                                                                                                                                                                                                                                                                                                          |
| diclofenac + lisinopril        | 1 | Diclofenac, lisinopril. pharmacodynamic antagonism. Avoid or Use Alternate Drug. Co-administration may result in a significant decrease in renal function. NSAIDs may diminish the antihypertensive effect of ACE inhibitors. The mechanism of these interactions is likely related to the ability of NSAIDs to reduce the synthesis of vasodilating renal prostaglandins                                                                            |
| enalapril + ketorolac          | 1 | Ketorolac, enalapril. pharmacodynamic antagonism. Avoid or Use Alternate Drug. Co-administration may result in a significant decrease in renal function. NSAIDs may diminish the antihypertensive effect of ACE inhibitors. The mechanism of these interactions is likely related to the ability of NSAIDs to reduce the synthesis of vasodilating renal prostaglandins                                                                              |
| enalapril + losartan           | 1 | Losartan, enalapril. Either increases toxicity of the other by pharmacodynamic synergism. Avoid or Use Alternate Drug. Dual blockade of renin-angiotensin system increases risks of hypotension, hyperkalemia, and renal impairment                                                                                                                                                                                                                  |
| enoxaparin + heparin           | 1 | Enoxaparin and heparin both increase anticoagulation. Avoid or Use Alternate Drug                                                                                                                                                                                                                                                                                                                                                                    |
| fluconazole + octreotide       | 1 | Fluconazole and octreotide both increase QTc interval. Avoid or Use Alternate Drug                                                                                                                                                                                                                                                                                                                                                                   |
| heparin + warfarin             | 1 | Heparin increases effects of warfarin by anticoagulation. Avoid or Use Alternate Drug. Avoid combined use once INR is established in the desired therapeutic range                                                                                                                                                                                                                                                                                   |
| ketorolac + meloxicam          | 1 | Meloxicam, ketorolac. Either increases toxicity of the other by pharmacodynamic synergism. Contraindicated                                                                                                                                                                                                                                                                                                                                           |
| lisinopril + losartan          | 1 | Losartan, lisinopril. Either increases toxicity of the other by pharmacodynamic synergism. Avoid or Use Alternate Drug. Dual blockade of renin-angiotensin system increases risks of hypotension, hyperkalemia, and renal impairment                                                                                                                                                                                                                 |
| lisinopril + meloxicam         | 1 | Meloxicam, lisinopril. pharmacodynamic antagonism. Avoid or Use Alternate                                                                                                                                                                                                                                                                                                                                                                            |

---

Drug. Co-administration may result in a significant decrease in renal function. NSAIDs may diminish the antihypertensive effect of ACE inhibitors. The mechanism of these interactions is likely related to the ability of NSAIDs to reduce the synthesis of vasodilating renal prostaglandins

---

**\*Note:** Impact of drug-drug interactions associated with the combinations 'aspirin + captopril' and 'aspirin + enalapril' may be considered insignificant due to the use of low-dose aspirin in the majority of cases. Administration of aspirin at doses less than 300 mg per day has little effect on the effectiveness of captopril and enalapril. Administration of aspirin in higher doses reduces the effectiveness of captopril and enalapril.



**Table S3.** The detailed explanation of the entire list of pairwise monitor-closely drug-drug interactions among taken drugs in the cohort of cardiovascular patients based on data of electronic health records in 2019-2022 ( $n = 704$ ).

| Drug combination           | n   | Monitor-closely drug-drug interactions (T-List)                                                                                                                                                                                                                                                                                                                         |
|----------------------------|-----|-------------------------------------------------------------------------------------------------------------------------------------------------------------------------------------------------------------------------------------------------------------------------------------------------------------------------------------------------------------------------|
| aspirin + losartan         | 104 | Aspirin decreases effects of losartan by pharmacodynamic antagonism. Modify Therapy/Monitor Closely. NSAIDs decrease synthesis of vasodilating renal prostaglandins, and thus affect fluid homeostasis and may diminish antihypertensive effect                                                                                                                         |
| aspirin + bisoprolol       | 94  | Aspirin decreases effects of bisoprolol by pharmacodynamic antagonism. Use Caution/Monitor. Long term (>1 wk) NSAID use. NSAIDs decrease prostaglandin synthesis                                                                                                                                                                                                        |
| bisoprolol + losartan      | 58  | Bisoprolol, losartan. Mechanism: pharmacodynamic synergism. Use Caution/Monitor. Risk of fetal compromise if given during pregnancy                                                                                                                                                                                                                                     |
| aspirin + spironolactone   | 42  | Aspirin decreases effects of spironolactone by unspecified interaction mechanism. Use Caution/Monitor. When used concomitantly, spironolactone dose may need to be titrated to higher maintenance dose and the patient should be observed closely to determine if the desired effect is obtained                                                                        |
| amiodarone + losartan      | 32  | Amiodarone will increase the level or effect of losartan by affecting hepatic enzyme CYP2C9/10 metabolism. Use Caution/Monitor. May inhibit the conversion of losartan to its active metabolite E-3174. Importance of interaction not established; monitor individual therapeutic response to determine losartan dosage                                                 |
| aspirin + metoprolol       | 32  | Aspirin decreases effects of metoprolol by pharmacodynamic antagonism. Use Caution/Monitor. Long term (>1 wk) NSAID use. NSAIDs decrease prostaglandin synthesis                                                                                                                                                                                                        |
| losartan + metoprolol      | 32  | Losartan and metoprolol both increase serum potassium. Use Caution/Monitor                                                                                                                                                                                                                                                                                              |
| bisoprolol + torsemide     | 31  | Bisoprolol increases and torsemide decreases serum potassium. Effect of interaction is not clear, use caution. Use Caution/Monitor                                                                                                                                                                                                                                      |
| digoxin + spironolactone   | 30  | Spironolactone increases levels of digoxin by Other (see comment). Use Caution/Monitor. Comment: Spironolactone may cause false elevation of digoxin assay                                                                                                                                                                                                              |
| aspirin + perindopril      | 25  | Aspirin, perindopril. pharmacodynamic antagonism. Avoid or Use Alternate Drug. Co-administration may result in a significant decrease in renal function. NSAIDs may diminish the antihypertensive effect of ACE inhibitors. The mechanism of these interactions is likely related to the ability of NSAIDs to reduce the synthesis of vasodilating renal prostaglandins |
| aspirin + torsemide        | 24  | Aspirin increases and torsemide decreases serum potassium. Effect of interaction is not clear, use caution. Use Caution/Monitor                                                                                                                                                                                                                                         |
| spironolactone + torsemide | 24  | Spironolactone increases and torsemide decreases serum potassium. Effect of interaction is not clear, use caution. Modify Therapy/Monitor Closely                                                                                                                                                                                                                       |
| aspirin + candesartan      | 21  | Aspirin decreases effects of candesartan by pharmacodynamic antagonism. Modify Therapy/Monitor Closely. NSAIDs decrease synthesis of vasodilating                                                                                                                                                                                                                       |

|                             |    |                                                                                                                                                                                                                                                                                                                                                                        |
|-----------------------------|----|------------------------------------------------------------------------------------------------------------------------------------------------------------------------------------------------------------------------------------------------------------------------------------------------------------------------------------------------------------------------|
|                             |    | renal prostaglandins, and thus affect fluid homeostasis and may diminish antihypertensive effect                                                                                                                                                                                                                                                                       |
| amlodipine + bisoprolol     | 20 | Bisoprolol, amlodipine. Either increases effects of the other by pharmacodynamic synergism. Use Caution/Monitor. Both drugs lower blood pressure                                                                                                                                                                                                                       |
| aspirin + clopidogrel       | 20 | Aspirin, clopidogrel. Either increases toxicity of the other by pharmacodynamic synergism. Use Caution/Monitor. The need for simultaneous use of low-dose aspirin and anticoagulant or antiplatelet agents are common for patients with cardiovascular disease; monitor closely                                                                                        |
| digoxin + torsemide         | 20 | Digoxin increases and torsemide decreases serum potassium. Effect of interaction is not clear, use caution. Use Caution/Monitor                                                                                                                                                                                                                                        |
| losartan + torsemide        | 20 | Losartan increases and torsemide decreases serum potassium. Effect of interaction is not clear, use caution. Use Caution/Monitor                                                                                                                                                                                                                                       |
| bisoprolol + spironolactone | 19 | Bisoprolol and spironolactone both increase serum potassium. Modify Therapy/Monitor Closely                                                                                                                                                                                                                                                                            |
| insulin aspart + lisinopril | 19 | Lisinopril increases effects of insulin aspart by pharmacodynamic synergism. Use Caution/Monitor                                                                                                                                                                                                                                                                       |
| aspirin + insulin           | 18 | Aspirin increases effects of insulin aspart by pharmacodynamic synergism. Modify Therapy/Monitor Closely. Co-administration of insulin with high doses of salicylates (3 g/day or more) may increase risk for hypoglycemia. Insulin dose adjustment and increased frequency of glucose monitoring may be required                                                      |
| aspirin + lisinopril        | 18 | Aspirin, lisinopril. pharmacodynamic antagonism. Avoid or Use Alternate Drug. Co-administration may result in a significant decrease in renal function. NSAIDs may diminish the antihypertensive effect of ACE inhibitors. The mechanism of these interactions is likely related to the ability of NSAIDs to reduce the synthesis of vasodilating renal prostaglandins |
| bisoprolol + digoxin        | 18 | Bisoprolol increases effects of digoxin by pharmacodynamic synergism. Use Caution/Monitor. Enhanced bradycardia                                                                                                                                                                                                                                                        |
| furosemide + spironolactone | 18 | Spironolactone increases and furosemide decreases serum potassium. Effect of interaction is not clear, use caution. Modify Therapy/Monitor Closely                                                                                                                                                                                                                     |
| indapamide + losartan       | 18 | Losartan increases and indapamide decreases serum potassium. Effect of interaction is not clear, use caution. Use Caution/Monitor                                                                                                                                                                                                                                      |
| losartan + spironolactone   | 18 | Losartan and spironolactone both increase serum potassium. Modify Therapy/Monitor Closely                                                                                                                                                                                                                                                                              |
| lisinopril + spironolactone | 16 | Lisinopril, spironolactone. Mechanism: pharmacodynamic synergism. Use Caution/Monitor. Risk of hyperkalemia                                                                                                                                                                                                                                                            |
| amiodarone + atorvastatin   | 14 | Amiodarone will increase the level or effect of atorvastatin by P-glycoprotein (MDR1) efflux transporter. Use Caution/Monitor                                                                                                                                                                                                                                          |
| aspirin + carvedilol        | 14 | Aspirin decreases effects of carvedilol by pharmacodynamic antagonism. Use Caution/Monitor. Long term (>1 wk) NSAID use. NSAIDs decrease prostaglandin synthesis                                                                                                                                                                                                       |
| aspirin + enoxaparin        | 14 | Aspirin, enoxaparin. Either increases toxicity of the other by pharmacody-                                                                                                                                                                                                                                                                                             |

|                              |    |                                                                                                                                                                                                                                                                                                                                                                                                                                                                                                                                                                                               |
|------------------------------|----|-----------------------------------------------------------------------------------------------------------------------------------------------------------------------------------------------------------------------------------------------------------------------------------------------------------------------------------------------------------------------------------------------------------------------------------------------------------------------------------------------------------------------------------------------------------------------------------------------|
|                              |    | <p>namic synergism. Use Caution/Monitor. The need for simultaneous use of low-dose aspirin and anticoagulant or antiplatelet agents are common for patients with cardiovascular disease; monitor closely</p>                                                                                                                                                                                                                                                                                                                                                                                  |
| atorvastatin + dexamethasone | 14 | <p>Atorvastatin will increase the level or effect of dexamethasone by P-glycoprotein (MDR1) efflux transporter. Use Caution/Monitor</p>                                                                                                                                                                                                                                                                                                                                                                                                                                                       |
| candesartan + metoprolol     | 14 | <p>Candesartan and metoprolol both increase serum potassium. Use Caution/Monitor</p>                                                                                                                                                                                                                                                                                                                                                                                                                                                                                                          |
| sotalol + spironolactone     | 13 | <p>Sotalol and spironolactone both increase serum potassium. Modify Therapy/Monitor Closely</p>                                                                                                                                                                                                                                                                                                                                                                                                                                                                                               |
| aspirin + furosemide         | 12 | <p>Aspirin increases and furosemide decreases serum potassium. Effect of interaction is not clear, use caution. Use Caution/Monitor</p>                                                                                                                                                                                                                                                                                                                                                                                                                                                       |
| aspirin + heparin            | 12 | <p>Aspirin, heparin. Either increases toxicity of the other by anticoagulation. Use Caution/Monitor. The need for simultaneous use of low-dose aspirin and anticoagulant or antiplatelet agents are common for patients with cardiovascular disease; monitor closely</p>                                                                                                                                                                                                                                                                                                                      |
| aspirin + valsartan          | 12 | <p>Aspirin decreases effects of valsartan by pharmacodynamic antagonism. Modify Therapy/Monitor Closely. NSAIDs decrease synthesis of vasodilating renal prostaglandins, and thus affect fluid homeostasis and may diminish antihypertensive effect</p>                                                                                                                                                                                                                                                                                                                                       |
| atorvastatin + ranolazine    | 12 | <p>Ranolazine will increase the level or effect of atorvastatin by P-glycoprotein (MDR1) efflux transporter. Use Caution/Monitor</p>                                                                                                                                                                                                                                                                                                                                                                                                                                                          |
| metformin + torsemide        | 12 | <p>Torsemide decreases effects of metformin by pharmacodynamic antagonism. Use Caution/Monitor</p>                                                                                                                                                                                                                                                                                                                                                                                                                                                                                            |
| amiodarone + rivaroxaban     | 11 | <p>Amiodarone increases levels of rivaroxaban by affecting hepatic/intestinal enzyme CYP3A4 metabolism. Use Caution/Monitor. Patients with renal impairment receiving rivaroxaban with drugs that are combined P-gp and weak or moderate CYP3A4 inhibitors may have significant increases in exposure compared with patients with normal renal function and no inhibitor use, since both pathways of rivaroxaban elimination are affected. Since these increases may increase bleeding risk, use rivaroxaban in this situation only if the potential benefit justifies the potential risk</p> |
| amiodarone + metoprolol      | 10 | <p>Amiodarone will increase the level or effect of metoprolol by affecting hepatic enzyme CYP2D6 metabolism. Use Caution/Monitor. Monitor cardiac function carefully and observe for signs of bradycardia or heart block when amiodarone and a beta adrenergic blocker are co-administered. Amiodarone should be used with caution in patients receiving a beta adrenergic blocker, particularly if there is suspicion of underlying dysfunction of the sinus node, such as bradycardia or sick sinus syndrome, or if there is partial AV block</p>                                           |
| aspirin + indapamide         | 10 | <p>Aspirin increases and indapamide decreases serum potassium. Effect of interaction is not clear, use caution. Use Caution/Monitor</p>                                                                                                                                                                                                                                                                                                                                                                                                                                                       |
| atorvastatin + valsartan     | 10 | <p>Atorvastatin will increase the level or effect of valsartan by Other (see comment). Use Caution/Monitor. The results from an in vitro study with human liver tissue indicate that valsartan is a substrate of the hepatic uptake transporter OATP1B1; co-administration with OATP1B1 inhibitors may increase</p>                                                                                                                                                                                                                                                                           |

|                                  |    |                                                                                                                                                                                                                                                                                                                                                                                                                                                                                                                              |
|----------------------------------|----|------------------------------------------------------------------------------------------------------------------------------------------------------------------------------------------------------------------------------------------------------------------------------------------------------------------------------------------------------------------------------------------------------------------------------------------------------------------------------------------------------------------------------|
|                                  |    | valsartan systemic exposure                                                                                                                                                                                                                                                                                                                                                                                                                                                                                                  |
| digoxin + losartan               | 10 | Losartan and digoxin both increase serum potassium. Use Caution/Monitor                                                                                                                                                                                                                                                                                                                                                                                                                                                      |
| hydrochlorothiazide + metoprolol | 10 | Hydrochlorothiazide, metoprolol. Either increases toxicity of the other by Other (see comment). Modify Therapy/Monitor Closely. Comment: May cause idiosyncratic reaction, resulting in acute transient myopia and acute angle-closure glaucoma, which can lead to permanent vision loss                                                                                                                                                                                                                                     |
| aspirin + hydrochlorothiazide    | 9  | Aspirin increases and hydrochlorothiazide decreases serum potassium. Effect of interaction is not clear, use caution. Use Caution/Monitor                                                                                                                                                                                                                                                                                                                                                                                    |
| furosemide + lisinopril          | 9  | Lisinopril, furosemide. Mechanism: pharmacodynamic synergism. Use Caution/Monitor. Risk of acute hypotension, renal insufficiency                                                                                                                                                                                                                                                                                                                                                                                            |
| lisinopril + torsemide           | 9  | Lisinopril, torsemide. Mechanism: pharmacodynamic synergism. Use Caution/Monitor. Risk of acute hypotension, renal insufficiency                                                                                                                                                                                                                                                                                                                                                                                             |
| losartan + omeprazole            | 9  | Omeprazole will increase the level or effect of losartan by affecting hepatic enzyme CYP2C9/10 metabolism. Use Caution/Monitor. May inhibit the conversion of losartan to its active metabolite E-3174. Importance of interaction not established; monitor individual therapeutic response to determine losartan dosage                                                                                                                                                                                                      |
| metoprolol + spironolactone      | 9  | Metoprolol and spironolactone both increase serum potassium. Modify Therapy/Monitor Closely                                                                                                                                                                                                                                                                                                                                                                                                                                  |
| amlodipine + carvedilol          | 8  | Carvedilol and amlodipine both increase anti-hypertensive channel blocking. Modify Therapy/Monitor Closely                                                                                                                                                                                                                                                                                                                                                                                                                   |
| aspirin + rivaroxaban            | 8  | Aspirin, rivaroxaban. Either increases toxicity of the other by anticoagulation. Use Caution/Monitor. Both drugs have the potential to cause bleeding. The need for simultaneous use of low-dose aspirin (<100 mg/day) with anticoagulants are common for patients with cardiovascular disease, but may result in increased bleeding; monitor closely. Promptly evaluate any signs or symptoms of blood loss if treated concomitantly with low-dose aspirin. Avoid co-administration with chronic use of higher dose aspirin |
| atorvastatin + nifedipine        | 8  | Nifedipine will increase the level or effect of atorvastatin by affecting hepatic/intestinal enzyme CYP3A4 metabolism. Use Caution/Monitor. nifedipine will decrease the level or effect of atorvastatin by P-glycoprotein (MDR1) efflux transporter. Use Caution/Monitor                                                                                                                                                                                                                                                    |
| bisoprolol + furosemide          | 8  | Bisoprolol increases and furosemide decreases serum potassium. Effect of interaction is not clear, use caution. Use Caution/Monitor                                                                                                                                                                                                                                                                                                                                                                                          |
| clopidogrel + rivaroxaban        | 8  | Rivaroxaban, clopidogrel. Other (see comment). Use Caution/Monitor. Comment: Avoid concurrent administration of clopidogrel with rivaroxaban unless the benefit outweighs the risk of increased bleeding                                                                                                                                                                                                                                                                                                                     |
| furosemide + losartan            | 8  | Losartan increases and furosemide decreases serum potassium. Effect of interaction is not clear, use caution. Use Caution/Monitor                                                                                                                                                                                                                                                                                                                                                                                            |
| lisinopril + metformin           | 8  | Lisinopril increases toxicity of metformin by unspecified interaction mechanism. Use Caution/Monitor. Increases risk for hypoglycemia and lactic acidosis                                                                                                                                                                                                                                                                                                                                                                    |

|                            |   |                                                                                                                                                                                                                                                                                                                                                                                                                                                                                                                                                                                                                                                                                                                                                  |
|----------------------------|---|--------------------------------------------------------------------------------------------------------------------------------------------------------------------------------------------------------------------------------------------------------------------------------------------------------------------------------------------------------------------------------------------------------------------------------------------------------------------------------------------------------------------------------------------------------------------------------------------------------------------------------------------------------------------------------------------------------------------------------------------------|
| amlodipine + metformin     | 7 | Amlodipine decreases effects of metformin by pharmacodynamic antagonism. Use Caution/Monitor. Patient should be closely observed for loss of blood glucose control; when drugs are withdrawn from a patient receiving metformin, patient should be observed closely for hypoglycemia                                                                                                                                                                                                                                                                                                                                                                                                                                                             |
| aspirin + enalapril*       | 7 | Aspirin, enalapril. pharmacodynamic antagonism. Avoid or Use Alternate Drug. Co-administration may result in a significant decrease in renal function. NSAIDs may diminish the antihypertensive effect of ACE inhibitors. The mechanism of these interactions is likely related to the ability of NSAIDs to reduce the synthesis of vasodilating renal prostaglandins                                                                                                                                                                                                                                                                                                                                                                            |
| clopidogrel + verapamil    | 7 | Verapamil will decrease the level or effect of clopidogrel by affecting hepatic/intestinal enzyme CYP3A4 metabolism. Use Caution/Monitor. Inhibition of CYP3A4 will reduce clopidogrel bioactivation                                                                                                                                                                                                                                                                                                                                                                                                                                                                                                                                             |
| dexamethasone + enoxaparin | 7 | Dexamethasone, enoxaparin. Other (see comment). Use Caution/Monitor. Comment: Corticosteroids may decrease anticoagulant effects by increasing blood coagulability; conversely, they may impair vascular integrity, thus increasing bleeding risk. Monitor INR closely                                                                                                                                                                                                                                                                                                                                                                                                                                                                           |
| enoxaparin + losartan      | 7 | Enoxaparin increases toxicity of losartan by Other (see comment). Use Caution/Monitor. Comment: Low molecular weight heparins may suppress adrenal aldosterone secretion, which can potentially cause hyperkalemia                                                                                                                                                                                                                                                                                                                                                                                                                                                                                                                               |
| furosemide + sotalol       | 7 | Sotalol increases and furosemide decreases serum potassium. Effect of interaction is not clear, use caution. Use Caution/Monitor                                                                                                                                                                                                                                                                                                                                                                                                                                                                                                                                                                                                                 |
| indapamide + metoprolol    | 7 | Metoprolol increases and indapamide decreases serum potassium. Effect of interaction is not clear, use caution. Use Caution/Monitor                                                                                                                                                                                                                                                                                                                                                                                                                                                                                                                                                                                                              |
| sotalol + torsemide        | 7 | Sotalol increases and torsemide decreases serum potassium. Effect of interaction is not clear, use caution. Use Caution/Monitor                                                                                                                                                                                                                                                                                                                                                                                                                                                                                                                                                                                                                  |
| amlodipine + sotalol       | 6 | Sotalol and amlodipine both increase anti-hypertensive channel blocking. Modify Therapy/Monitor Closely                                                                                                                                                                                                                                                                                                                                                                                                                                                                                                                                                                                                                                          |
| apixaban + aspirin         | 6 | Aspirin and apixaban both increase anticoagulation. Modify Therapy/Monitor Closely. Both drugs have the potential to cause bleeding. The need for simultaneous use of low-dose aspirin (<100 mg/day) with anticoagulants are common for patients with cardiovascular disease, but may result in increased bleeding; monitor closely. Promptly evaluate any signs or symptoms of blood loss if treated concomitantly with low-dose aspirin. Avoid co-administration with chronic use of higher dose aspirin. In 1 trial (APPRAISE-2), therapy was terminated because of significantly increased bleeding when apixaban was administered with dual antiplatelet therapy (eg, aspirin plus clopidogrel) compared with single antiplatelet treatment |
| aspirin + azilsartan       | 6 | Aspirin, azilsartan. Either increases toxicity of the other by Other (see comment). Use Caution/Monitor. Comment: May result in renal function deterioration, particularly in elderly or volume depleted individuals. aspirin decreases effects of azilsartan by pharmacodynamic antagonism. Modify Therapy/Monitor Closely. NSAIDs decrease synthesis of vasodilating renal prostaglandins, and thus affect fluid homeostasis and may diminish antihypertensive effect                                                                                                                                                                                                                                                                          |

|                                   |   |                                                                                                                                                                                                                                                                                                                                                                                                                                 |
|-----------------------------------|---|---------------------------------------------------------------------------------------------------------------------------------------------------------------------------------------------------------------------------------------------------------------------------------------------------------------------------------------------------------------------------------------------------------------------------------|
| aspirin + ketorolac               | 6 | Aspirin, ketorolac. Either increases toxicity of the other by pharmacodynamic synergism. Contraindicated                                                                                                                                                                                                                                                                                                                        |
| aspirin + telmisartan             | 6 | Aspirin decreases effects of telmisartan by pharmacodynamic antagonism. Modify Therapy/Monitor Closely. NSAIDs decrease synthesis of vasodilating renal prostaglandins, and thus affect fluid homeostasis and may diminish antihypertensive effect                                                                                                                                                                              |
| bisoprolol + ketorolac            | 6 | Bisoprolol and ketorolac both increase serum potassium. Use Caution/Monitor                                                                                                                                                                                                                                                                                                                                                     |
| candesartan + sotalol             | 6 | Candesartan and sotalol both increase serum potassium. Use Caution/Monitor                                                                                                                                                                                                                                                                                                                                                      |
| digoxin + metformin               | 6 | Digoxin, metformin. Either increases levels of the other by basic (cationic) drug competition for renal tubular clearance. Use Caution/Monitor. Measure serum digoxin concentrations before initiating metformin. Monitor patients who take both metformin and digoxin for possible digoxin toxicity and lactic acidosis. Reduce the digoxin and/or metformin dose as necessary                                                 |
| digoxin + omeprazole              | 6 | Omeprazole will increase the level or effect of digoxin by increasing gastric pH. Applies only to oral form of both agents. Avoid or Use Alternate Drug                                                                                                                                                                                                                                                                         |
| metformin + nifedipine            | 6 | Nifedipine decreases effects of metformin by pharmacodynamic antagonism. Use Caution/Monitor. Patient should be closely observed for loss of blood glucose control; when drugs are withdrawn from a patient receiving metformin, patient should be observed closely for hypoglycemia. nifedipine increases levels of metformin by enhancing GI absorption. Applies only to oral form of both agents. Minor/Significance Unknown |
| amiodarone + bisoprolol           | 5 | Amiodarone, bisoprolol. Mechanism: pharmacodynamic synergism. Use Caution/Monitor. Risk of cardiotoxicity with bradycardia                                                                                                                                                                                                                                                                                                      |
| amiodarone + metformin            | 5 | Amiodarone will increase the level or effect of metformin by basic (cationic) drug competition for renal tubular clearance. Use Caution/Monitor                                                                                                                                                                                                                                                                                 |
| aspirin + digoxin                 | 5 | Aspirin and digoxin both increase serum potassium. Use Caution/Monitor                                                                                                                                                                                                                                                                                                                                                          |
| atorvastatin + digoxin            | 5 | Atorvastatin will increase the level or effect of digoxin by P-glycoprotein (MDR1) efflux transporter. Use Caution/Monitor                                                                                                                                                                                                                                                                                                      |
| bisoprolol + valsartan            | 5 | Bisoprolol, valsartan. Mechanism: pharmacodynamic synergism. Use Caution/Monitor. Risk of fetal compromise if given during pregnancy                                                                                                                                                                                                                                                                                            |
| candesartan + hydrochlorothiazide | 5 | Candesartan increases and hydrochlorothiazide decreases serum potassium. Effect of interaction is not clear, use caution. Use Caution/Monitor                                                                                                                                                                                                                                                                                   |
| carvedilol + nifedipine           | 5 | Carvedilol and nifedipine both increase anti-hypertensive channel blocking. Modify Therapy/Monitor Closely                                                                                                                                                                                                                                                                                                                      |
| losartan + warfarin               | 5 | Losartan will increase the level or effect of warfarin by affecting hepatic enzyme CYP2C9/10 metabolism. Use Caution/Monitor                                                                                                                                                                                                                                                                                                    |
| perindopril + torsemide           | 5 | Perindopril, torsemide. Mechanism: pharmacodynamic synergism. Use Caution/Monitor. Risk of acute hypotension, renal insufficiency                                                                                                                                                                                                                                                                                               |
| amiodarone + captopril            | 4 | Amiodarone, captopril. Either increases effects of the other by pharmacodynamic synergism. Use Caution/Monitor. Both drugs lower blood pressure. Monitor blood pressure                                                                                                                                                                                                                                                         |

|                                  |   |                                                                                                                                                                                                                                                                                                                                                                                                                                                                               |
|----------------------------------|---|-------------------------------------------------------------------------------------------------------------------------------------------------------------------------------------------------------------------------------------------------------------------------------------------------------------------------------------------------------------------------------------------------------------------------------------------------------------------------------|
| amiodarone + warfarin            | 4 | Amiodarone will increase the level or effect of warfarin by affecting hepatic enzyme CYP2C9/10 metabolism. Modify Therapy/Monitor Closely. Co-administration increases INR by 100% after 3-4 days. Reduce warfarin dose by one-third to one-half and monitor INR                                                                                                                                                                                                              |
| aspirin + dexamethasone          | 4 | Aspirin, dexamethasone. Either increases toxicity of the other by pharmacodynamic synergism. Use Caution/Monitor. Increased risk of GI ulceration                                                                                                                                                                                                                                                                                                                             |
| atorvastatin + budesonide        | 4 | Atorvastatin will increase the level or effect of budesonide by P-glycoprotein (MDR1) efflux transporter. Use Caution/Monitor                                                                                                                                                                                                                                                                                                                                                 |
| bisoprolol + felodipine          | 4 | Bisoprolol and felodipine both increase anti-hypertensive channel blocking. Modify Therapy/Monitor Closely                                                                                                                                                                                                                                                                                                                                                                    |
| bisoprolol + hydrochlorothiazide | 4 | Bisoprolol increases and hydrochlorothiazide decreases serum potassium. Effect of interaction is not clear, use caution. Use Caution/Monitor                                                                                                                                                                                                                                                                                                                                  |
| bisoprolol + indapamide          | 4 | Bisoprolol increases and indapamide decreases serum potassium. Effect of interaction is not clear, use caution. Use Caution/Monitor                                                                                                                                                                                                                                                                                                                                           |
| bisoprolol + potassium chloride  | 4 | Bisoprolol and potassium chloride both increase serum potassium. Modify Therapy/Monitor Closely                                                                                                                                                                                                                                                                                                                                                                               |
| bisoprolol + telmisartan         | 4 | Bisoprolol, telmisartan. Mechanism: pharmacodynamic synergism. Use Caution/Monitor. Risk of fetal compromise if given during pregnancy                                                                                                                                                                                                                                                                                                                                        |
| budesonide + omeprazole          | 4 | Omeprazole decreases effects of budesonide by increasing gastric pH. Applies only to oral form of both agents. Modify Therapy/Monitor Closely. Enteric-coated budesonide dissolves at pH >5.5. Also, dissolution of extended-release budesonide tablets is pH dependent. Co-administration with drugs that increase gastric pH may cause these budesonide products to prematurely dissolve, and possibly affect release properties and absorption of the drug in the duodenum |
| clopidogrel + heparin            | 4 | Heparin, clopidogrel. Either increases effects of the other by pharmacodynamic synergism. Modify Therapy/Monitor Closely. Enhanced risk of hemorrhage; additive effects are intended when both drugs are prescribed as indicated for ACS                                                                                                                                                                                                                                      |
| digoxin + furosemide             | 4 | Digoxin increases and furosemide decreases serum potassium. Effect of interaction is not clear, use caution. Use Caution/Monitor                                                                                                                                                                                                                                                                                                                                              |
| digoxin + metoprolol             | 4 | Digoxin increases toxicity of metoprolol by unspecified interaction mechanism. Avoid or Use Alternate Drug. Can increase risk of bradycardia                                                                                                                                                                                                                                                                                                                                  |
| furosemide + torsemide           | 4 | Furosemide and torsemide both decrease serum potassium. Use Caution/Monitor                                                                                                                                                                                                                                                                                                                                                                                                   |
| metoprolol + torsemide           | 4 | Metoprolol increases and torsemide decreases serum potassium. Effect of interaction is not clear, use caution. Use Caution/Monitor                                                                                                                                                                                                                                                                                                                                            |
| omeprazole + warfarin            | 4 | Omeprazole will increase the level or effect of warfarin by Other (see comment). Use Caution/Monitor. Warfarin's less potent R-enantiomer is metabolized in part by CYP3A4 (and also CYP1A2 and CYP2C19). Monitor INR more frequently if co-administered with inhibitors of these isoenzymes and adjust warfarin dose if needed                                                                                                                                               |

|                                 |   |                                                                                                                                                                                                                                                                                                                                                                                                                                                                                                                                                      |
|---------------------------------|---|------------------------------------------------------------------------------------------------------------------------------------------------------------------------------------------------------------------------------------------------------------------------------------------------------------------------------------------------------------------------------------------------------------------------------------------------------------------------------------------------------------------------------------------------------|
| aspirin + potassium chloride    | 3 | Aspirin and potassium chloride both increase serum potassium. Modify Therapy/Monitor Closely                                                                                                                                                                                                                                                                                                                                                                                                                                                         |
| bisoprolol + meloxicam          | 3 | Bisoprolol and meloxicam both increase serum potassium. Use Caution/Monitor                                                                                                                                                                                                                                                                                                                                                                                                                                                                          |
| budesonide + dexamethasone      | 3 | Budesonide will decrease the level or effect of dexamethasone by affecting hepatic/intestinal enzyme CYP3A4 metabolism. Use Caution/Monitor                                                                                                                                                                                                                                                                                                                                                                                                          |
| budesonide + enoxaparin         | 3 | Budesonide, enoxaparin. Other (see comment). Use Caution/Monitor. Comment: Corticosteroids may decrease anticoagulant effects by increasing blood coagulability; conversely, they may impair vascular integrity, thus increasing bleeding risk. Monitor INR closely                                                                                                                                                                                                                                                                                  |
| dexamethasone + heparin         | 3 | Dexamethasone, heparin. Other (see comment). Use Caution/Monitor. Comment: Corticosteroids may decrease anticoagulant effects by increasing blood coagulability; conversely, they may impair vascular integrity, thus increasing bleeding risk. Monitor INR closely                                                                                                                                                                                                                                                                                  |
| enalapril + insulin lispro      | 3 | Enalapril increases effects of insulin lispro by pharmacodynamic synergism. Use Caution/Monitor                                                                                                                                                                                                                                                                                                                                                                                                                                                      |
| furosemide + potassium chloride | 3 | Potassium chloride increases and furosemide decreases serum potassium. Effect of interaction is not clear, use caution. Modify Therapy/Monitor Closely                                                                                                                                                                                                                                                                                                                                                                                               |
| heparin + losartan              | 3 | Heparin increases toxicity of losartan by Other (see comment). Use Caution/Monitor. Comment: Low molecular weight heparins may suppress adrenal aldosterone secretion, which can potentially cause hyperkalemia                                                                                                                                                                                                                                                                                                                                      |
| heparin + prednisolone          | 3 | Prednisolone, heparin. Other (see comment). Use Caution/Monitor. Comment: Corticosteroids may decrease anticoagulant effects by increasing blood coagulability; conversely, they may impair vascular integrity, thus increasing bleeding risk. Monitor INR closely                                                                                                                                                                                                                                                                                   |
| hydrochlorothiazide + valsartan | 3 | Valsartan increases and hydrochlorothiazide decreases serum potassium. Effect of interaction is not clear, use caution. Use Caution/Monitor                                                                                                                                                                                                                                                                                                                                                                                                          |
| indapamide + sotalol            | 3 | Indapamide and sotalol both increase QTc interval. Contraindicated                                                                                                                                                                                                                                                                                                                                                                                                                                                                                   |
| indapamide + torsemide          | 3 | Torsemide and indapamide both decrease serum potassium. Use Caution/Monitor                                                                                                                                                                                                                                                                                                                                                                                                                                                                          |
| ketorolac + losartan            | 3 | Ketorolac decreases effects of losartan by pharmacodynamic antagonism. Modify Therapy/Monitor Closely. NSAIDs decrease synthesis of vasodilating renal prostaglandins, and thus affect fluid homeostasis and may diminish antihypertensive effect                                                                                                                                                                                                                                                                                                    |
| amiodarone + budesonide         | 2 | Amiodarone will increase the level or effect of budesonide by P-glycoprotein (MDR1) efflux transporter. Use Caution/Monitor                                                                                                                                                                                                                                                                                                                                                                                                                          |
| amiodarone + nebivolol          | 2 | Amiodarone will increase the level or effect of nebivolol by affecting hepatic enzyme CYP2D6 metabolism. Use Caution/Monitor. Monitor cardiac function carefully and observe for signs of bradycardia or heart block when amiodarone and a beta adrenergic blocker are co-administered. Amiodarone should be used with caution in patients receiving a beta adrenergic blocker, particularly if there is suspicion of underlying dysfunction of the sinus node, such as bradycardia or sick sinus syndrome, or if there is partial AV block. amioda- |



|                              |   |                                                                                                                                                                                                                                                                                                                                                                                                                                                                             |
|------------------------------|---|-----------------------------------------------------------------------------------------------------------------------------------------------------------------------------------------------------------------------------------------------------------------------------------------------------------------------------------------------------------------------------------------------------------------------------------------------------------------------------|
|                              |   | rone, nebivolol. Mechanism: pharmacodynamic synergism. Use Caution/Monitor. Risk of cardiotoxicity with bradycardia                                                                                                                                                                                                                                                                                                                                                         |
| amitriptyline + atorvastatin | 2 | Atorvastatin will increase the level or effect of amitriptyline by P-glycoprotein (MDR1) efflux transporter. Use Caution/Monitor                                                                                                                                                                                                                                                                                                                                            |
| amoxicillin + aspirin        | 2 | Amoxicillin, aspirin. Either increases levels of the other by plasma protein binding competition. Use Caution/Monitor. amoxicillin, aspirin. Either increases levels of the other by decreasing renal clearance. Use Caution/Monitor                                                                                                                                                                                                                                        |
| ampicillin + aspirin         | 2 | Ampicillin, aspirin. Either increases levels of the other by plasma protein binding competition. Use Caution/Monitor                                                                                                                                                                                                                                                                                                                                                        |
| aspirin + chlorthalidone     | 2 | Aspirin increases and chlorthalidone decreases serum potassium. Effect of interaction is not clear, use caution. Use Caution/Monitor                                                                                                                                                                                                                                                                                                                                        |
| aspirin + diclofenac         | 2 | Aspirin and diclofenac both increase anticoagulation. Use Caution/Monitor                                                                                                                                                                                                                                                                                                                                                                                                   |
| aspirin + doxazosin          | 2 | Aspirin decreases effects of doxazosin by pharmacodynamic antagonism. Use Caution/Monitor. NSAIDs decrease prostaglandin synthesis                                                                                                                                                                                                                                                                                                                                          |
| aspirin + fosinopril         | 2 | Aspirin, fosinopril. Pharmacodynamic antagonism. Avoid or Use Alternate Drug. Co-administration may result in a significant decrease in renal function. NSAIDs may diminish the antihypertensive effect of ACE inhibitors. The mechanism of these interactions is likely related to the ability of NSAIDs to reduce the synthesis of vasodilating renal prostaglandins                                                                                                      |
| aspirin + meloxicam          | 2 | Aspirin and meloxicam both increase anticoagulation. Use Caution/Monitor                                                                                                                                                                                                                                                                                                                                                                                                    |
| aspirin + nitroglycerin      | 2 | Aspirin increases effects of nitroglycerin sublingual by additive vasodilation. Use Caution/Monitor. Vasodilatory and hemodynamic effects of NTG may be enhanced by co-administration with aspirin (additive effect desirable for emergent treatment)                                                                                                                                                                                                                       |
| aspirin + sotalol            | 2 | Aspirin decreases effects of sotalol by pharmacodynamic antagonism. Use Caution/Monitor. Long term (>1 wk) NSAID use. NSAIDs decrease prostaglandin synthesis                                                                                                                                                                                                                                                                                                               |
| atorvastatin + azithromycin  | 2 | Azithromycin will increase the level or effect of atorvastatin by affecting hepatic/intestinal enzyme CYP3A4 metabolism. Use Caution/Monitor. If this combination is used, closely monitor for evidence of atorvastatin toxicity (eg, muscle aches or pains, renal dysfunction)                                                                                                                                                                                             |
| atorvastatin + prednisolone  | 2 | Atorvastatin will increase the level or effect of prednisolone by P-glycoprotein (MDR1) efflux transporter. Use Caution/Monitor                                                                                                                                                                                                                                                                                                                                             |
| azilsartan + ibuprofen       | 2 | Ibuprofen, azilsartan. Either increases toxicity of the other by Other (see comment). Use Caution/Monitor. Comment: May result in renal function deterioration, particularly in elderly or volume depleted individuals. ibuprofen decreases effects of azilsartan by pharmacodynamic antagonism. Modify Therapy/Monitor Closely. NSAIDs decrease synthesis of vasodilating renal prostaglandins, and thus affect fluid homeostasis and may diminish antihypertensive effect |
| bisoprolol + candesartan     | 2 | Bisoprolol, candesartan. Mechanism: pharmacodynamic synergism. Use Caution/Monitor. Risk of fetal compromise if given during pregnancy                                                                                                                                                                                                                                                                                                                                      |

|                                |   |                                                                                                                                                                                                                                                                                                                                                                                                                                                                                                                                                                |
|--------------------------------|---|----------------------------------------------------------------------------------------------------------------------------------------------------------------------------------------------------------------------------------------------------------------------------------------------------------------------------------------------------------------------------------------------------------------------------------------------------------------------------------------------------------------------------------------------------------------|
| bisoprolol + diclofenac        | 2 | Bisoprolol and diclofenac both increase serum potassium. Use Caution/Monitor                                                                                                                                                                                                                                                                                                                                                                                                                                                                                   |
| bisoprolol + nifedipine        | 2 | Bisoprolol, nifedipine. Either decreases effects of the other by pharmacodynamic synergism. Use Caution/Monitor. Both drugs lower blood pressure                                                                                                                                                                                                                                                                                                                                                                                                               |
| calcium carbonate + metoprolol | 2 | Calcium carbonate decreases effects of metoprolol by unspecified interaction mechanism. Use Caution/Monitor                                                                                                                                                                                                                                                                                                                                                                                                                                                    |
| candesartan + enoxaparin       | 2 | Enoxaparin increases toxicity of candesartan by Other (see comment). Use Caution/Monitor. Comment: Low molecular weight heparins may suppress adrenal aldosterone secretion, which can potentially cause hyperkalemia                                                                                                                                                                                                                                                                                                                                          |
| candesartan + insulin aspart   | 2 | Candesartan increases effects of insulin aspart by unspecified interaction mechanism. Use Caution/Monitor. Concomitant use of insulin and ARBs may require insulin dosage adjustment and increased glucose monitoring                                                                                                                                                                                                                                                                                                                                          |
| candesartan + spironolactone   | 2 | Candesartan and spironolactone both increase serum potassium. Modify Therapy/Monitor Closely                                                                                                                                                                                                                                                                                                                                                                                                                                                                   |
| captopril + potassium chloride | 2 | Captopril increases levels of potassium chloride by decreasing elimination. Use Caution/Monitor. Risk of hyperkalemia                                                                                                                                                                                                                                                                                                                                                                                                                                          |
| carvedilol + losartan          | 2 | Carvedilol, losartan. Mechanism: pharmacodynamic synergism. Use Caution/Monitor. Risk of fetal compromise if given during pregnancy                                                                                                                                                                                                                                                                                                                                                                                                                            |
| cefotaxime + warfarin          | 2 | Cefotaxime increases effects of warfarin by unspecified interaction mechanism. Use Caution/Monitor                                                                                                                                                                                                                                                                                                                                                                                                                                                             |
| ciprofloxacin + dexamethasone  | 2 | Dexamethasone and ciprofloxacin both increase Other (see comment). Use Caution/Monitor. Co-administration of quinolone antibiotics and corticosteroids may increase risk of tendon rupture                                                                                                                                                                                                                                                                                                                                                                     |
| clopidogrel + pantoprazole     | 2 | Pantoprazole decreases effects of clopidogrel by affecting hepatic enzyme CYP2C19 metabolism. Use Caution/Monitor. Clopidogrel efficacy may be reduced by drugs that inhibit CYP2C19. Inhibition of platelet aggregation by clopidogrel is entirely due to the active clopidogrel metabolite. Clopidogrel is metabolized in part by CYP2C19. Pantoprazole prescribing information state that co-administration with clopidogrel had no clinically important effect on exposure to clopidogrel active metabolite; no dose adjustment of clopidogrel is required |
| dexamethasone + diclofenac     | 2 | Diclofenac, dexamethasone. Either increases toxicity of the other by pharmacodynamic synergism. Use Caution/Monitor. Increased risk of GI ulceration                                                                                                                                                                                                                                                                                                                                                                                                           |
| diclofenac + ketorolac         | 2 | Diclofenac, ketorolac. Either increases toxicity of the other by pharmacodynamic synergism. Contraindicated                                                                                                                                                                                                                                                                                                                                                                                                                                                    |
| digoxin + indapamide           | 2 | Digoxin increases and indapamide decreases serum potassium. Effect of interaction is not clear, use caution. Use Caution/Monitor                                                                                                                                                                                                                                                                                                                                                                                                                               |
| digoxin + potassium            | 2 | Potassium chloride and digoxin both increase serum potassium. Modify Therapy/Monitor Closely                                                                                                                                                                                                                                                                                                                                                                                                                                                                   |
| doxazosin + nifedipine         | 2 | Doxazosin and nifedipine both increase anti-hypertensive channel blocking. Use Caution/Monitor                                                                                                                                                                                                                                                                                                                                                                                                                                                                 |
| enalapril + enoxaparin         | 2 | Enoxaparin increases toxicity of enalapril by Other (see comment). Use Cau-                                                                                                                                                                                                                                                                                                                                                                                                                                                                                    |

|                               |   |                                                                                                                                                                                                                                                                                                                                                                          |
|-------------------------------|---|--------------------------------------------------------------------------------------------------------------------------------------------------------------------------------------------------------------------------------------------------------------------------------------------------------------------------------------------------------------------------|
|                               |   | tion/Monitor. Comment: Low molecular weight heparins may suppress adrenal aldosterone secretion, which can potentially cause hyperkalemia                                                                                                                                                                                                                                |
| enalapril + furosemide        | 2 | Enalapril, furosemide. Mechanism: pharmacodynamic synergism. Use Caution/Monitor. Risk of acute hypotension, renal insufficiency                                                                                                                                                                                                                                         |
| enalapril + metformin         | 2 | Enalapril increases toxicity of metformin by unspecified interaction mechanism. Use Caution/Monitor. Increases risk for hypoglycemia and lactic acidosis                                                                                                                                                                                                                 |
| enalapril + potassium         | 2 | Enalapril increases levels of potassium chloride by decreasing elimination. Use Caution/Monitor. Risk of hyperkalemia                                                                                                                                                                                                                                                    |
| enalapril + spironolactone    | 2 | Enalapril, spironolactone. Mechanism: pharmacodynamic synergism. Use Caution/Monitor. Risk of hyperkalemia                                                                                                                                                                                                                                                               |
| fosinopril + torsemide        | 2 | Fosinopril, torsemide. Mechanism: pharmacodynamic synergism. Use Caution/Monitor. Risk of acute hypotension, renal insufficiency                                                                                                                                                                                                                                         |
| furosemide + metoprolol       | 2 | Metoprolol increases and furosemide decreases serum potassium. Effect of interaction is not clear, use caution. Use Caution/Monitor                                                                                                                                                                                                                                      |
| heparin + lisinopril          | 2 | Heparin increases toxicity of lisinopril by Other (see comment). Use Caution/Monitor. Comment: Low molecular weight heparins may suppress adrenal aldosterone secretion, which can potentially cause hyperkalemia                                                                                                                                                        |
| hydrochlorothiazide + sotalol | 2 | Sotalol increases and hydrochlorothiazide decreases serum potassium. Effect of interaction is not clear, use caution. Use Caution/Monitor                                                                                                                                                                                                                                |
| indapamide + ketorolac        | 2 | Indapamide will increase the level or effect of ketorolac by acidic (anionic) drug competition for renal tubular clearance. Minor/Significance Unknown                                                                                                                                                                                                                   |
| ketorolac + lisinopril        | 2 | Ketorolac, lisinopril. Pharmacodynamic antagonism. Avoid or Use Alternate Drug. Co-administration may result in a significant decrease in renal function. NSAIDs may diminish the antihypertensive effect of ACE inhibitors. The mechanism of these interactions is likely related to the ability of NSAIDs to reduce the synthesis of vasodilating renal prostaglandins |
| ketorolac + meloxicam         | 2 | Ketorolac and meloxicam both increase anticoagulation. Use Caution/Monitor                                                                                                                                                                                                                                                                                               |
| ketorolac + rivaroxaban       | 2 | Rivaroxaban, ketorolac. Other (see comment). Use Caution/Monitor. Comment: NSAIDs are known to increase bleeding. Bleeding risk may be increased when NSAIDs are used concomitantly with rivaroxaban. Monitor for signs/symptoms of blood loss                                                                                                                           |
| levofloxacin + prednisolone   | 2 | Prednisolone and levofloxacin both increase Other (see comment). Use Caution/Monitor. Co-administration of quinolone antibiotics and corticosteroids may increase risk of tendon rupture                                                                                                                                                                                 |
| losartan + bisoprolol         | 2 | Losartan and bisoprolol both increase serum potassium. Use Caution/Monitor                                                                                                                                                                                                                                                                                               |
| losartan + nebivolol          | 2 | Losartan and nebivolol both increase serum potassium. Use Caution/Monitor                                                                                                                                                                                                                                                                                                |
| losartan + potassium          | 2 | Losartan and potassium chloride both increase serum potassium. Use Caution/Monitor                                                                                                                                                                                                                                                                                       |
| losartan + sotalol            | 2 | Losartan and sotalol both increase serum potassium. Use Caution/Monitor                                                                                                                                                                                                                                                                                                  |
| metformin + perindopril       | 2 | Perindopril increases toxicity of metformin by unspecified interaction mechanism                                                                                                                                                                                                                                                                                         |

|                           |   |                                                                                                                                                                                                                                                                                                |
|---------------------------|---|------------------------------------------------------------------------------------------------------------------------------------------------------------------------------------------------------------------------------------------------------------------------------------------------|
|                           |   | nism. Use Caution/Monitor. Increases risk for hypoglycemia and lactic acidosis                                                                                                                                                                                                                 |
| metoprolol + nifedipine   | 2 | Metoprolol and nifedipine both increase anti-hypertensive channel blocking. Modify Therapy/Monitor Closely                                                                                                                                                                                     |
| metoprolol + sotalol      | 2 | Metoprolol and sotalol both increase anti-hypertensive channel blocking. Avoid or Use Alternate Drug                                                                                                                                                                                           |
| potassium + torsemide     | 2 | Potassium chloride increases and torsemide decreases serum potassium. Effect of interaction is not clear, use caution. Modify Therapy/Monitor Closely                                                                                                                                          |
| acetaminophen + heparin   | 1 | Acetaminophen increases effects of heparin by unknown mechanism. Minor/Significance Unknown                                                                                                                                                                                                    |
| amiodarone + atenolol     | 1 | Amiodarone, atenolol. Mechanism: pharmacodynamic synergism. Use Caution/Monitor. Risk of cardiotoxicity with bradycardia                                                                                                                                                                       |
| amiodarone + lidocaine    | 1 | Amiodarone increases levels of lidocaine by affecting hepatic/intestinal enzyme CYP3A4 metabolism. Modify Therapy/Monitor Closely. Higher doses of amiodarone (ie, 600 mg BID) were shown to significantly increase lidocaine levels                                                           |
| amiodarone + prednisolone | 1 | Amiodarone will increase the level or effect of prednisolone by P-glycoprotein (MDR1) efflux transporter. Use Caution/Monitor                                                                                                                                                                  |
| amlodipine + nebivolol    | 1 | Nebivolol, amlodipine. Either increases effects of the other by pharmacodynamic synergism. Use Caution/Monitor. Both drugs lower blood pressure                                                                                                                                                |
| ampicillin + omeprazole   | 1 | Omeprazole will decrease the level or effect of ampicillin by increasing gastric pH. Applies only to oral form of both agents. Use Caution/Monitor                                                                                                                                             |
| aspirin + escitalopram    | 1 | Escitalopram, aspirin. Either increases toxicity of the other by pharmacodynamic synergism. Use Caution/Monitor. Increased risk of upper GI bleeding. SSRIs inhib. serotonin uptake by platelets                                                                                               |
| aspirin + glimepiride     | 1 | Aspirin increases effects of glimepiride by unknown mechanism. Use Caution/Monitor. Risk of hypoglycemia                                                                                                                                                                                       |
| aspirin + indapamide      | 1 | Aspirin increases and indapamide decreases serum potassium. Effect of interaction is not clear, use caution. Use Caution/Monitor                                                                                                                                                               |
| aspirin + ticagrelor      | 1 | Aspirin, ticagrelor. Other (see comment). Use Caution/Monitor. Comment: Maintenance doses of aspirin above 100 mg decreases effectiveness of ticagrelor. Therefore, after the initial loading dose of aspirin (usually 325 mg), use ticagrelor with a maintenance dose of aspirin of 75-100 mg |
| atenolol + chlorthalidone | 1 | Atenolol increases and chlorthalidone decreases serum potassium. Effect of interaction is not clear, use caution. Use Caution/Monitor                                                                                                                                                          |
| atenolol + indapamide     | 1 | Atenolol increases and indapamide decreases serum potassium. Effect of interaction is not clear, use caution. Use Caution/Monitor                                                                                                                                                              |
| atenolol + potassium      | 1 | Atenolol and potassium chloride both increase serum potassium. Modify Therapy/Monitor Closely                                                                                                                                                                                                  |
| atenolol + sotalol        | 1 | Atenolol and sotalol both increase serum potassium. Use Caution/Monitor                                                                                                                                                                                                                        |
| atorvastatin + dabigatran | 1 | Atorvastatin will increase the level or effect of dabigatran by P-glycoprotein                                                                                                                                                                                                                 |

|                                |   |                                                                                                                                                                                                                                                                                                                                                                                                                             |
|--------------------------------|---|-----------------------------------------------------------------------------------------------------------------------------------------------------------------------------------------------------------------------------------------------------------------------------------------------------------------------------------------------------------------------------------------------------------------------------|
|                                |   | (MDR1) efflux transporter. Use Caution/Monitor. Atrial fibrillation: Avoid co-administering dabigatran with P-gp inhibitors if CrCl <30 mL/min. DVT/PE treatment: Avoid co-administering dabigatran with P-gp inhibitors if CrCl <50 mL/min                                                                                                                                                                                 |
| atorvastatin + telmisartan     | 1 | Telmisartan increases toxicity of atorvastatin by Other (see comment). Use Caution/Monitor. Comment: OATP1B1 inhibitors may increase risk of myopathy                                                                                                                                                                                                                                                                       |
| azithromycin + warfarin        | 1 | Azithromycin increases toxicity of warfarin by anticoagulation. Use Caution/Monitor. Postmarketing reports have suggested that concomitant administration of azithromycin may potentiate effects of oral warfarin but the interaction does not appear to alter prothrombin time                                                                                                                                             |
| bisoprolol + doxazosin         | 1 | Doxazosin and bisoprolol both increase anti-hypertensive channel blocking. Modify Therapy/Monitor Closely                                                                                                                                                                                                                                                                                                                   |
| bisoprolol + insulin degludec  | 1 | Bisoprolol, insulin degludec. Other (see comment). Modify Therapy/Monitor Closely. Comment: Beta-blockers may either increase or decrease the blood glucose lowering effect of insulin; beta-blockers can prolong hypoglycemia (interference with glycogenolysis) or cause hyperglycemia (insulin secretion inhibited)                                                                                                      |
| bisoprolol + ivabradine        | 1 | Ivabradine, bisoprolol. Either increases effects of the other by pharmacodynamic synergism. Modify Therapy/Monitor Closely. Most patients receiving ivabradine will also be treated with a beta-blocker. The risk of bradycardia increases with co-administration of drugs that slow heart rate (eg, digoxin, amiodarone, beta-blockers). Monitor heart rate in patients taking ivabradine with other negative chronotropes |
| bisoprolol + theophylline      | 1 | Bisoprolol, theophylline. Other (see comment). Use Caution/Monitor. Comment: Beta blockers (esp. non selective) antagonize theophylline effects, while at the same time increasing theophylline levels and toxicity (mechanism: decreased theophylline metabolism). Smoking increases risk of interaction                                                                                                                   |
| budesonide + heparin           | 1 | Budesonide, heparin. Other (see comment). Use Caution/Monitor. Comment: Corticosteroids may decrease anticoagulant effects by increasing blood coagulability; conversely, they may impair vascular integrity, thus increasing bleeding risk. Monitor INR closely                                                                                                                                                            |
| calcium carbonate + nifedipine | 1 | Calcium carbonate decreases effects of nifedipine by pharmacodynamic antagonism. Use Caution/Monitor                                                                                                                                                                                                                                                                                                                        |
| candesartan + dalteparin       | 1 | Dalteparin increases toxicity of candesartan by Other (see comment). Use Caution/Monitor. Comment: Low molecular weight heparins may suppress adrenal aldosterone secretion, which can potentially cause hyperkalemia                                                                                                                                                                                                       |
| candesartan + torsemide        | 1 | Candesartan increases and torsemide decreases serum potassium. Effect of interaction is not clear, use caution. Use Caution/Monitor                                                                                                                                                                                                                                                                                         |
| captopril + furosemide         | 1 | Captopril, furosemide. Mechanism: pharmacodynamic synergism. Use Caution/Monitor. Risk of acute hypotension, renal insufficiency                                                                                                                                                                                                                                                                                            |
| captopril + losartan           | 1 | Losartan, captopril. Either increases toxicity of the other by pharmacodynamic synergism. Avoid or Use Alternate Drug. Dual blockade of renin-angiotensin system increases risks of hypotension, hyperkalemia, and renal impairment                                                                                                                                                                                         |

|                                |   |                                                                                                                                                                                                                                                                                                                |
|--------------------------------|---|----------------------------------------------------------------------------------------------------------------------------------------------------------------------------------------------------------------------------------------------------------------------------------------------------------------|
| carvedilol + indapamide        | 1 | Carvedilol increases and indapamide decreases serum potassium. Effect of interaction is not clear, use caution. Use Caution/Monitor                                                                                                                                                                            |
| chlorthalidone + ibuprofen     | 1 | Chlorthalidone will increase the level or effect of ibuprofen by acidic (anionic) drug competition for renal tubular clearance. Minor/Significance Unknown                                                                                                                                                     |
| chlorthalidone + metoprolol    | 1 | Metoprolol increases and chlorthalidone decreases serum potassium. Effect of interaction is not clear, use caution. Use Caution/Monitor                                                                                                                                                                        |
| ciprofloxacin + diclofenac     | 1 | Diclofenac, ciprofloxacin. Other (see comment). Modify Therapy/Monitor Closely. Comment: Mechanism: unknown. Increased risk of CNS stimulation and seizures with high doses of fluoroquinolones                                                                                                                |
| clarithromycin + dexamethasone | 1 | Clarithromycin will increase the level or effect of dexamethasone by affecting hepatic/intestinal enzyme CYP3A4 metabolism. Avoid or Use Alternate Drug                                                                                                                                                        |
| clopidogrel + diclofenac       | 1 | Clopidogrel, diclofenac. Either increases effects of the other by pharmacodynamic synergism. Modify Therapy/Monitor Closely. Clopidogrel and NSAIDs both inhibit platelet aggregation                                                                                                                          |
| clopidogrel + enoxaparin       | 1 | Enoxaparin, clopidogrel. Either increases effects of the other by pharmacodynamic synergism. Modify Therapy/Monitor Closely. Enhanced risk of hemorrhage; additive effects are intended when both drugs are prescribed as indicated for ACS                                                                    |
| clopidogrel + ibuprofen        | 1 | Clopidogrel, ibuprofen. Either increases effects of the other by pharmacodynamic synergism. Modify Therapy/Monitor Closely. Clopidogrel and NSAIDs both inhibit platelet aggregation                                                                                                                           |
| clopidogrel + piracetam        | 1 | Piracetam increases effects of clopidogrel by pharmacodynamic synergism. Use Caution/Monitor                                                                                                                                                                                                                   |
| clopidogrel + torsemide        | 1 | Clopidogrel increases levels of torsemide by decreasing metabolism. Minor/Significance Unknown                                                                                                                                                                                                                 |
| cyanocobalamin + omeprazole    | 1 | Omeprazole decreases levels of cyanocobalamin by inhibition of GI absorption. Applies only to oral form of both agents. Minor/Significance Unknown                                                                                                                                                             |
| dalteparin + dexamethasone     | 1 | Dexamethasone, dalteparin. Other (see comment). Use Caution/Monitor. Comment: Corticosteroids may decrease anticoagulant effects by increasing blood coagulability; conversely, they may impair vascular integrity, thus increasing bleeding risk. Monitor INR closely                                         |
| dexamethasone + ketorolac      | 1 | Ketorolac, dexamethasone. Either increases toxicity of the other by pharmacodynamic synergism. Use Caution/Monitor. Increased risk of GI ulceration                                                                                                                                                            |
| dexamethasone + levofloxacin   | 1 | Dexamethasone and levofloxacin both increase Other (see comment). Use Caution/Monitor. Co-administration of quinolone antibiotics and corticosteroids may increase risk of tendon rupture                                                                                                                      |
| dexamethasone + theophylline   | 1 | Dexamethasone will decrease the level or effect of theophylline by affecting hepatic/intestinal enzyme CYP3A4 metabolism. Use Caution/Monitor                                                                                                                                                                  |
| diclofenac + enalapril         | 1 | Diclofenac, enalapril. pharmacodynamic antagonism. Avoid or Use Alternate Drug. Co-administration may result in a significant decrease in renal function. NSAIDs may diminish the antihypertensive effect of ACE inhibitors. The mechanism of these interactions is likely related to the ability of NSAIDs to |

|                               |   |                                                                                                                                                                                                                                                                                                                                                                           |
|-------------------------------|---|---------------------------------------------------------------------------------------------------------------------------------------------------------------------------------------------------------------------------------------------------------------------------------------------------------------------------------------------------------------------------|
|                               |   | reduce the synthesis of vasodilating renal prostaglandins                                                                                                                                                                                                                                                                                                                 |
| diclofenac + heparin          | 1 | Heparin and diclofenac both increase anticoagulation. Modify Therapy/Monitor Closely                                                                                                                                                                                                                                                                                      |
| diclofenac + lisinopril       | 1 | Diclofenac, lisinopril. pharmacodynamic antagonism. Avoid or Use Alternate Drug. Co-administration may result in a significant decrease in renal function. NSAIDs may diminish the antihypertensive effect of ACE inhibitors. The mechanism of these interactions is likely related to the ability of NSAIDs to reduce the synthesis of vasodilating renal prostaglandins |
| diclofenac + potassium        | 1 | Diclofenac and potassium chloride both increase serum potassium. Modify Therapy/Monitor Closely                                                                                                                                                                                                                                                                           |
| digoxin + levofloxacin        | 1 | Levofloxacin will increase the level or effect of digoxin by altering intestinal flora. Applies only to oral form of both agents. Use Caution/Monitor                                                                                                                                                                                                                     |
| digoxin + lisinopril          | 1 | Lisinopril increases levels of digoxin by unspecified interaction mechanism. Use Caution/Monitor                                                                                                                                                                                                                                                                          |
| doxazosin + ketorolac         | 1 | Ketorolac decreases effects of doxazosin by pharmacodynamic antagonism. Use Caution/Monitor. NSAIDs decrease prostaglandin synthesis                                                                                                                                                                                                                                      |
| doxazosin + metoprolol        | 1 | Doxazosin and metoprolol both increase anti-hypertensive channel blocking. Modify Therapy/Monitor Closely                                                                                                                                                                                                                                                                 |
| enalapril + heparin           | 1 | Heparin increases toxicity of enalapril by Other (see comment). Use Caution/Monitor. Comment: Low molecular weight heparins may suppress adrenal aldosterone secretion, which can potentially cause hyperkalemia                                                                                                                                                          |
| enalapril + ketorolac         | 1 | Enalapril, ketorolac. Either increases toxicity of the other by Other (see comment). Use Caution/Monitor. Comment: May result in renal function deterioration, particularly in elderly or volume depleted individuals                                                                                                                                                     |
| enoxaparin + lisinopril       | 1 | Enoxaparin increases toxicity of lisinopril by Other (see comment). Use Caution/Monitor. Comment: Low molecular weight heparins may suppress adrenal aldosterone secretion, which can potentially cause hyperkalemia                                                                                                                                                      |
| escitalopram + omeprazole     | 1 | Omeprazole will increase the level or effect of escitalopram by affecting hepatic enzyme CYP2C19 metabolism. Use Caution/Monitor                                                                                                                                                                                                                                          |
| fluconazole + levofloxacin    | 1 | Fluconazole and levofloxacin both increase QTc interval. Modify Therapy/Monitor Closely                                                                                                                                                                                                                                                                                   |
| fluconazole + omeprazole      | 1 | Fluconazole will increase the level or effect of omeprazole by affecting hepatic enzyme CYP2C19 metabolism. Use Caution/Monitor                                                                                                                                                                                                                                           |
| folic acid + torsemide        | 1 | Torsemide decreases levels of folic acid by increasing renal clearance. Minor/Significance Unknown                                                                                                                                                                                                                                                                        |
| furosemide + indapamide       | 1 | Furosemide and indapamide both decrease serum potassium. Use Caution/Monitor                                                                                                                                                                                                                                                                                              |
| furosemide + insulin degludec | 1 | Furosemide decreases effects of insulin degludec by Other (see comment). Use Caution/Monitor. Comment: Diuretics may cause hyperglycemia and glycosuria in patients with diabetes mellitus, possibly by diuretic-induced hypokalemia                                                                                                                                      |

|                                   |   |                                                                                                                                                                                                                                                                                                                                                                                                                             |
|-----------------------------------|---|-----------------------------------------------------------------------------------------------------------------------------------------------------------------------------------------------------------------------------------------------------------------------------------------------------------------------------------------------------------------------------------------------------------------------------|
| furosemide + ketorolac            | 1 | Ketorolac increases and furosemide decreases serum potassium. Effect of interaction is not clear, use caution. Use Caution/Monitor                                                                                                                                                                                                                                                                                          |
| heparin + ketorolac               | 1 | Heparin and ketorolac both increase anticoagulation. Modify Therapy/Monitor Closely                                                                                                                                                                                                                                                                                                                                         |
| hydrochlorothiazide + telmisartan | 1 | Telmisartan increases and hydrochlorothiazide decreases serum potassium. Effect of interaction is not clear, use caution. Use Caution/Monitor                                                                                                                                                                                                                                                                               |
| indapamide + potassium            | 1 | Potassium chloride increases and indapamide decreases serum potassium. Effect of interaction is not clear, use caution. Modify Therapy/Monitor Closely                                                                                                                                                                                                                                                                      |
| indapamide + spironolactone       | 1 | Spironolactone increases and indapamide decreases serum potassium. Effect of interaction is not clear, use caution. Modify Therapy/Monitor Closely                                                                                                                                                                                                                                                                          |
| insulin regular human + metformin | 1 | Metformin, insulin regular human. Either increases effects of the other by pharmacodynamic synergism. Use Caution/Monitor. Antidiabetic agents are often used in combination; dosage adjustments may be required when initiating or discontinuing antidiabetic agents                                                                                                                                                       |
| ivabradine + metoprolol           | 1 | Ivabradine, metoprolol. Either increases effects of the other by pharmacodynamic synergism. Modify Therapy/Monitor Closely. Most patients receiving ivabradine will also be treated with a beta-blocker. The risk of bradycardia increases with co-administration of drugs that slow heart rate (eg, digoxin, amiodarone, beta-blockers). Monitor heart rate in patients taking ivabradine with other negative chronotropes |
| ketorolac + potassium             | 1 | Ketorolac and potassium chloride both increase serum potassium. Modify Therapy/Monitor Closely                                                                                                                                                                                                                                                                                                                              |
| ketorolac + spironolactone        | 1 | Spironolactone and ketorolac both increase serum potassium. Modify Therapy/Monitor Closely                                                                                                                                                                                                                                                                                                                                  |
| levofloxacin + magnesium sulfate  | 1 | Magnesium sulfate decreases levels of levofloxacin by inhibition of GI absorption. Applies only to oral form of both agents. Use Caution/Monitor. Separate by 2 hours                                                                                                                                                                                                                                                       |
| levofloxacin + octreotide         | 1 | Levofloxacin and octreotide both increase QTc interval. Modify Therapy/Monitor Closely                                                                                                                                                                                                                                                                                                                                      |
| levofloxacin + warfarin           | 1 | Levofloxacin increases effects of warfarin by unspecified interaction mechanism. Use Caution/Monitor                                                                                                                                                                                                                                                                                                                        |
| levothyroxine + metformin         | 1 | Levothyroxine decreases effects of metformin by pharmacodynamic antagonism. Use Caution/Monitor. Patient should be closely observed for loss of blood glucose control; when drugs are withdrawn from a patient receiving metformin, patient should be observed closely for hypoglycemia                                                                                                                                     |
| levothyroxine + warfarin          | 1 | Levothyroxine increases effects of warfarin by unspecified interaction mechanism. Use Caution/Monitor                                                                                                                                                                                                                                                                                                                       |
| lisinopril + meloxicam            | 1 | Lisinopril, meloxicam. Either increases toxicity of the other by Other (see comment). Use Caution/Monitor. Comment: May result in renal function deterioration, particularly in elderly or volume depleted individuals                                                                                                                                                                                                      |
| losartan + aspirin                | 1 | Losartan, aspirin. Either increases toxicity of the other by Other (see comment). Use Caution/Monitor. Comment: May result in renal function deterio-                                                                                                                                                                                                                                                                       |



|                              |   |                                                                                                                                                       |
|------------------------------|---|-------------------------------------------------------------------------------------------------------------------------------------------------------|
|                              |   | ration, particularly in elderly or volume depleted individuals                                                                                        |
| metformin + verapamil        | 1 | Metformin will increase the level or effect of verapamil by basic (cationic) drug competition for renal tubular clearance. Minor/Significance Unknown |
| metoprolol + potassium       | 1 | Metoprolol and potassium chloride both increase serum potassium. Modify Therapy/Monitor Closely                                                       |
| nifedipine + sotalol         | 1 | Sotalol and nifedipine both increase anti-hypertensive channel blocking. Modify Therapy/Monitor Closely                                               |
| perindopril + spironolactone | 1 | Perindopril, spironolactone. Mechanism: pharmacodynamic synergism. Use Caution/Monitor. Risk of hyperkalemia                                          |
| potassium chloride + sotalol | 1 | Sotalol and potassium chloride both increase serum potassium. Modify Therapy/Monitor Closely                                                          |
| spironolactone + valsartan   | 1 | Valsartan and spironolactone both increase serum potassium. Modify Therapy/Monitor Closely                                                            |
| telmisartan + torsemide      | 1 | Telmisartan increases and torsemide decreases serum potassium. Effect of interaction is not clear, use caution. Use Caution/Monitor                   |
| torsemide + metformin        | 1 | Torsemide decreases effects of metformin by pharmacodynamic antagonism. Use Caution/Monitor                                                           |
| valsartan + bisoprolol       | 1 | Valsartan and bisoprolol both increase serum potassium. Use Caution/Monitor                                                                           |

**\*Note:** Impact of drug-drug interactions associated with the combinations 'aspirin + captopril' and 'aspirin + enalapril' may be considered insignificant due to the use of low-dose aspirin in the majority of cases. Administration of aspirin at doses less than 300 mg per day has little effect on the effectiveness of captopril and enalapril. Administration of aspirin in higher doses reduces the effectiveness of captopril and enalapril.

**Table S4.** The detailed explanation of the entire list of pairwise minor drug-drug interactions among taken drugs in the cohort of cardiovascular patients based on data of electronic health records in 2019-2022 ( $n = 704$ ).

| Drug combination                | n  | Minor drug-drug interactions (T-List)                                                                                                                                                                                                                                                                                                |
|---------------------------------|----|--------------------------------------------------------------------------------------------------------------------------------------------------------------------------------------------------------------------------------------------------------------------------------------------------------------------------------------|
| clopidogrel + torsemide         | 13 | Clopidogrel increases levels of torsemide by decreasing metabolism. Minor/Significance Unknown                                                                                                                                                                                                                                       |
| aspirin + furosemide            | 12 | Aspirin decreases effects of furosemide by pharmacodynamic antagonism. Minor/Significance Unknown. NSAIDs decrease prostaglandin synthesis                                                                                                                                                                                           |
| furosemide + metformin          | 12 | Furosemide increases levels of metformin by unspecified interaction mechanism. Minor/Significance Unknown. Patient should be closely observed for loss of blood glucose control; when drugs are withdrawn from a patient receiving metformin, patient should be observed closely for hypoglycemia                                    |
| aspirin + indapamide            | 11 | Indapamide will increase the level or effect of aspirin by acidic (anionic) drug competition for renal tubular clearance. Minor/Significance Unknown                                                                                                                                                                                 |
| aspirin + hydrochlorothiazide   | 9  | Hydrochlorothiazide will increase the level or effect of aspirin by acidic (anionic) drug competition for renal tubular clearance. Minor/Significance Unknown                                                                                                                                                                        |
| metformin + nifedipine          | 7  | Nifedipine increases levels of metformin by enhancing GI absorption. Applies only to oral form of both agents. Minor/Significance Unknown                                                                                                                                                                                            |
| ascorbic acid + aspirin         | 6  | Ascorbic acid will increase the level or effect of aspirin by acidic (anionic) drug competition for renal tubular clearance. Minor/Significance Unknown. Ascorbic acid increases levels of aspirin by decreasing renal clearance. Minor/Significance Unknown                                                                         |
| carvedilol + omeprazole         | 6  | Omeprazole will increase the level or effect of carvedilol by affecting hepatic enzyme CYP2C9/10 metabolism. Minor/Significance Unknown                                                                                                                                                                                              |
| hydrochlorothiazide + metformin | 6  | Hydrochlorothiazide decreases effects of metformin by pharmacodynamic antagonism. Minor/Significance Unknown. Thiazide dosage >50 mg/day may increase blood glucose. hydrochlorothiazide will increase the level or effect of metformin by basic (cationic) drug competition for renal tubular clearance. Minor/Significance Unknown |
| acetaminophen + enoxaparin      | 5  | Acetaminophen increases effects of enoxaparin by unknown mechanism. Minor/Significance Unknown                                                                                                                                                                                                                                       |
| dexamethasone + omeprazole      | 5  | Dexamethasone will decrease the level or effect of omeprazole by affecting hepatic/intestinal enzyme CYP3A4 metabolism. Minor/Significance Unknown                                                                                                                                                                                   |
| indapamide + metformin          | 5  | Indapamide decreases effects of metformin by pharmacodynamic antagonism. Minor/Significance Unknown. Thiazide dosage >50 mg/day may increase blood glucose                                                                                                                                                                           |
| magnesium hydroxide + torsemide | 5  | Torsemide decreases levels of magnesium hydroxide by increasing renal clearance. Minor/Significance Unknown                                                                                                                                                                                                                          |
| ceftriaxone + furosemide        | 4  | Ceftriaxone increases toxicity of furosemide by pharmacodynamic synergism. Minor/Significance Unknown. Increased risk of nephrotoxicity                                                                                                                                                                                              |
| dexamethasone + insulin         | 4  | Dexamethasone decreases effects of insulin lispro by pharmacodynamic an-                                                                                                                                                                                                                                                             |

|                                      |   |                                                                                                                                                                                                                                                                                                                                                                                       |
|--------------------------------------|---|---------------------------------------------------------------------------------------------------------------------------------------------------------------------------------------------------------------------------------------------------------------------------------------------------------------------------------------------------------------------------------------|
|                                      |   | tagonism. Minor/Significance Unknown                                                                                                                                                                                                                                                                                                                                                  |
| folic acid + torsemide               | 4 | Torsemide decreases levels of folic acid by increasing renal clearance. Minor/Significance Unknown                                                                                                                                                                                                                                                                                    |
| amiodarone + pyridoxine              | 3 | Aspirin will increase the level or effect of ketorolac by acidic (anionic) drug competition for renal tubular clearance. Minor/Significance Unknown                                                                                                                                                                                                                                   |
| aspirin + ketorolac                  | 3 | Aspirin will increase the level or effect of ketorolac by acidic (anionic) drug competition for renal tubular clearance. Minor/Significance Unknown                                                                                                                                                                                                                                   |
| B12 + metformin                      | 3 | Metformin decreases levels of cyanocobalamin by unspecified interaction mechanism. Minor/Significance Unknown. It may take several years of metformin therapy to develop vitamin B12 deficiency                                                                                                                                                                                       |
| B12 + omeprazole                     | 3 | Omeprazole decreases levels of cyanocobalamin by inhibition of GI absorption. Applies only to oral form of both agents. Minor/Significance Unknown                                                                                                                                                                                                                                    |
| folic acid + metformin               | 3 | Metformin decreases levels of folic acid by unspecified interaction mechanism. Minor/Significance Unknown                                                                                                                                                                                                                                                                             |
| aspirin + B12                        | 2 | Aspirin decreases levels of cyanocobalamin by inhibition of GI absorption. Applies only to oral form of both agents. Minor/Significance Unknown                                                                                                                                                                                                                                       |
| aspirin + dexamethasone              | 2 | Dexamethasone decreases levels of aspirin by increasing renal clearance. Minor/Significance Unknown                                                                                                                                                                                                                                                                                   |
| aspirin + folic acid                 | 2 | Aspirin decreases levels of folic acid by inhibition of GI absorption. Applies only to oral form of both agents. Minor/Significance Unknown                                                                                                                                                                                                                                           |
| budesonide + torsemide               | 2 | Budesonide, torsemide. Mechanism: pharmacodynamic synergism. Minor/Significance Unknown. Risk of hypokalemia, especially with strong glucocorticoid activity                                                                                                                                                                                                                          |
| chlorthalidone + magnesium hydroxide | 2 | Chlorthalidone decreases levels of magnesium hydroxide by increasing renal clearance. Minor/Significance Unknown                                                                                                                                                                                                                                                                      |
| indapamide + ketorolac               | 2 | Indapamide will increase the level or effect of ketorolac by acidic (anionic) drug competition for renal tubular clearance. Minor/Significance Unknown                                                                                                                                                                                                                                |
| indapamide + magnesium               | 3 | Indapamide decreases levels of magnesium chloride by increasing renal clearance. Minor/Significance Unknown                                                                                                                                                                                                                                                                           |
| indapamide + magnesium hydroxide     | 2 | Indapamide decreases levels of magnesium hydroxide by increasing renal clearance. Minor/Significance Unknown                                                                                                                                                                                                                                                                          |
| indapamide + vildagliptin            | 2 | Indapamide decreases effects of vildagliptin by pharmacodynamic antagonism. Minor/Significance Unknown. Thiazide dosage >50 mg/day may increase blood glucose                                                                                                                                                                                                                         |
| magnesium hydroxide + spironolactone | 2 | Spironolactone increases levels of magnesium hydroxide by decreasing renal clearance. Minor/Significance Unknown                                                                                                                                                                                                                                                                      |
| omeprazole + theophylline            | 2 | Omeprazole will decrease the level or effect of theophylline by affecting hepatic enzyme CYP1A2 metabolism. Minor/Significance Unknown. omeprazole increases toxicity of theophylline by Other (see comment). Minor/Significance Unknown. Comment: Prolonged use of proton pump inhibitors can cause hypochlorhydria, which in turn causes peristalsis in small intestine to increase |

|                                   |   |                                                                                                                                                                                                                                                                                  |
|-----------------------------------|---|----------------------------------------------------------------------------------------------------------------------------------------------------------------------------------------------------------------------------------------------------------------------------------|
|                                   |   | and peristalsis in the proximal colon to decrease; monitor for toxicity                                                                                                                                                                                                          |
| thiamine + torsemide              | 2 | Torsemide decreases levels of thiamine by increasing renal clearance. Minor/Significance Unknown                                                                                                                                                                                 |
| acetaminophen + heparin           | 1 | Acetaminophen increases effects of heparin by unknown mechanism. Minor/Significance Unknown                                                                                                                                                                                      |
| acetazolamide + dexamethasone     | 1 | Acetazolamide will increase the level or effect of dexamethasone by affecting hepatic/intestinal enzyme CYP3A4 metabolism. Minor/Significance Unknown                                                                                                                            |
| acetylcysteine + nitroglycerin IV | 1 | Acetylcysteine increases effects of nitroglycerin IV by Other (see comment). Minor/Significance Unknown. Comment: Acetylcysteine may enhance vasodilatory effects of nitroglycerin                                                                                               |
| amikacin + fluconazole            | 1 | Fluconazole decreases levels of amikacin by unknown mechanism. Minor/Significance Unknown                                                                                                                                                                                        |
| amitriptyline + dexamethasone     | 1 | Dexamethasone will decrease the level or effect of amitriptyline by affecting hepatic/intestinal enzyme CYP3A4 metabolism. Minor/Significance Unknown                                                                                                                            |
| amitriptyline + metformin         | 1 | Amitriptyline increases effects of metformin by pharmacodynamic synergism. Minor/Significance Unknown                                                                                                                                                                            |
| aspirin + calcium carbonate       | 1 | Calcium carbonate, aspirin. Mechanism: passive renal tubular reabsorption due to increased pH. Minor/Significance Unknown. Salicylate levels increased at moderate doses; salicylate levels decreased at large doses (d/t increased renal excretion of unchanged salicylic acid) |
| aspirin + chlorthalidone          | 2 | Aspirin increases and chlorthalidone decreases serum potassium. Effect of interaction is not clear, use caution. Use Caution/Monitor                                                                                                                                             |
| aspirin + diclofenac              | 1 | Aspirin will increase the level or effect of diclofenac by acidic (anionic) drug competition for renal tubular clearance. Minor/Significance Unknown                                                                                                                             |
| aspirin + eplerenone              | 1 | Aspirin decreases effects of eplerenone by pharmacodynamic antagonism. Minor/Significance Unknown. NSAIDs decrease prostaglandin synthesis                                                                                                                                       |
| aspirin + glimepiride             | 1 | Aspirin increases effects of glimepiride by plasma protein binding competition. Minor/Significance Unknown. Large dose of salicylate                                                                                                                                             |
| aspirin + meloxicam               | 1 | Aspirin will increase the level or effect of meloxicam by acidic (anionic) drug competition for renal tubular clearance. Minor/Significance Unknown                                                                                                                              |
| azithromycin + levofloxacin       | 1 | Azithromycin and levofloxacin both increase QTc interval. Minor/Significance Unknown                                                                                                                                                                                             |
| budesonide + furosemide           | 1 | Budesonide, furosemide. Mechanism: pharmacodynamic synergism. Minor/Significance Unknown. Risk of hypokalemia, especially with strong glucocorticoid activity                                                                                                                    |
| budesonide + insulin              | 1 | Budesonide decreases effects of insulin regular human by pharmacodynamic antagonism. Minor/Significance Unknown                                                                                                                                                                  |
| budesonide + metformin            | 1 | Budesonide decreases effects of metformin by pharmacodynamic antagonism. Minor/Significance Unknown                                                                                                                                                                              |
| chlorthalidone + ibuprofen        | 1 | Chlorthalidone will increase the level or effect of ibuprofen by acidic (anionic) drug competition for renal tubular clearance. Minor/Significance Unknown                                                                                                                       |

|                                           |   |                                                                                                                                                                                     |
|-------------------------------------------|---|-------------------------------------------------------------------------------------------------------------------------------------------------------------------------------------|
| chlorthalidone + metformin                | 1 | Chlorthalidone decreases effects of metformin by pharmacodynamic antagonism. Minor/Significance Unknown. Thiazide dosage >50 mg/day may increase blood glucose                      |
| clarithromycin + dexamethasone            | 1 | Dexamethasone will decrease the level or effect of clarithromycin by affecting hepatic/intestinal enzyme CYP3A4 metabolism. Minor/Significance Unknown                              |
| dexamethasone + torsemide                 | 1 | Dexamethasone, torsemide. Mechanism: pharmacodynamic synergism. Minor/Significance Unknown. Risk of hypokalemia, especially with strong glucocorticoid activity                     |
| dextrose + magnesium sulfate              | 1 | Dextrose decreases levels of magnesium sulfate by increasing renal clearance. Minor/Significance Unknown                                                                            |
| diclofenac + ketorolac                    | 1 | Diclofenac will increase the level or effect of ketorolac by acidic (anionic) drug competition for renal tubular clearance. Minor/Significance Unknown                              |
| folic acid + furosemide                   | 1 | Furosemide decreases levels of folic acid by increasing renal clearance. Minor/Significance Unknown                                                                                 |
| furosemide + ketorolac                    | 1 | Ketorolac increases and furosemide decreases serum potassium. Effect of interaction is not clear, use caution. Use Caution/Monitor                                                  |
| furosemide + magnesium hydroxide          | 1 | Furosemide decreases levels of magnesium hydroxide by increasing renal clearance. Minor/Significance Unknown                                                                        |
| furosemide + magnesium sulfate            | 1 | Furosemide decreases levels of magnesium sulfate by increasing renal clearance. Minor/Significance Unknown                                                                          |
| heparin + nitroglycerin IV                | 1 | Nitroglycerin IV decreases effects of heparin by unspecified interaction mechanism. Minor/Significance Unknown                                                                      |
| hydrochlorothiazide + magnesium hydroxide | 1 | Hydrochlorothiazide decreases levels of magnesium hydroxide by increasing renal clearance. Minor/Significance Unknown                                                               |
| insulin + potassium                       | 2 | Potassium chloride increases effects of insulin regular human by pharmacodynamic synergism. Minor/Significance Unknown. Interaction especially seen in the treatment of hypokalemia |
| ketorolac + meloxicam                     | 1 | Ketorolac will increase the level or effect of meloxicam by acidic (anionic) drug competition for renal tubular clearance. Minor/Significance Unknown                               |
| lidocaine + omeprazole                    | 1 | Omeprazole will decrease the level or effect of lidocaine by affecting hepatic enzyme CYP1A2 metabolism. Minor/Significance Unknown                                                 |
| magnesium + torsemide                     | 1 | Torsemide decreases levels of magnesium hydroxide by increasing renal clearance. Minor/Significance Unknown                                                                         |
| metformin + potassium                     | 1 | Potassium chloride increases effects of metformin by pharmacodynamic synergism. Minor/Significance Unknown. Interaction especially seen in the treatment of hypokalemia             |
| metformin + verapamil                     | 1 | Metformin will increase the level or effect of verapamil by basic (cationic) drug competition for renal tubular clearance. Minor/Significance Unknown                               |
| metoprolol + oxazepam                     | 1 | Metoprolol increases effects of oxazepam by decreasing metabolism. Minor/Significance Unknown                                                                                       |
| pentoxifylline + theophylline             | 1 | Pentoxifylline increases levels of theophylline by decreasing metabolism.                                                                                                           |

---

|                            |   |                                                                                                                                                                |
|----------------------------|---|----------------------------------------------------------------------------------------------------------------------------------------------------------------|
| Minor/Significance Unknown |   |                                                                                                                                                                |
| prednisolone + torsemide   | 1 | Prednisolone, torsemide. Mechanism: pharmacodynamic synergism. Minor/Significance Unknown. Risk of hypokalemia, especially with strong glucocorticoid activity |

---

**Table S5.** The detailed explanation of the entire list of pairwise serious drug-drug interactions among prescribed drugs in the cohort of cardiovascular patients based on data of electronic health records in 2019–2022 ( $n = 704$ ).

| Drug combination         | n  | Serious drug-drug interactions (P-List)                                                                                                                                                                                                                                                                                                                                 |
|--------------------------|----|-------------------------------------------------------------------------------------------------------------------------------------------------------------------------------------------------------------------------------------------------------------------------------------------------------------------------------------------------------------------------|
| aspirin + captopril*     | 62 | Aspirin, captopril. Pharmacodynamic antagonism. Avoid or Use Alternate Drug. Co-administration may result in a significant decrease in renal function. NSAIDs may diminish the antihypertensive effect of ACE inhibitors. The mechanism of these interactions is likely related to the ability of NSAIDs to reduce the synthesis of vasodilating renal prostaglandins   |
| captopril + losartan     | 38 | Losartan, captopril. Either increases toxicity of the other by pharmacodynamic synergism. Avoid or Use Alternate Drug. Dual blockade of renin-angiotensin system increases risks of hypotension, hyperkalemia, and renal impairment                                                                                                                                     |
| aspirin + lisinopril     | 34 | Aspirin, lisinopril. pharmacodynamic antagonism. Avoid or Use Alternate Drug. Co-administration may result in a significant decrease in renal function. NSAIDs may diminish the antihypertensive effect of ACE inhibitors. The mechanism of these interactions is likely related to the ability of NSAIDs to reduce the synthesis of vasodilating renal prostaglandins  |
| aspirin + perindopril    | 34 | Aspirin, perindopril. pharmacodynamic antagonism. Avoid or Use Alternate Drug. Co-administration may result in a significant decrease in renal function. NSAIDs may diminish the antihypertensive effect of ACE inhibitors. The mechanism of these interactions is likely related to the ability of NSAIDs to reduce the synthesis of vasodilating renal prostaglandins |
| clopidogrel + omeprazole | 30 | Omeprazole decreases effects of clopidogrel by affecting hepatic enzyme CYP2C19 metabolism. Avoid or Use Alternate Drug. Clopidogrel efficacy may be reduced by drugs that inhibit CYP2C19. Inhibition of platelet aggregation by clopidogrel is entirely due to an active metabolite. Clopidogrel is metabolized to this active metabolite in part by CYP2C19          |
| amiodarone + indapamide  | 9  | Amiodarone and indapamide both increase QTc interval. Avoid or Use Alternate Drug                                                                                                                                                                                                                                                                                       |
| aspirin + enalapril*     | 7  | Aspirin, enalapril. Pharmacodynamic antagonism. Avoid or Use Alternate Drug. Co-administration may result in a significant decrease in renal function. NSAIDs may diminish the antihypertensive effect of ACE inhibitors. The mechanism of these interactions is likely related to the ability of NSAIDs to reduce the synthesis of vasodilating renal prostaglandins   |
| aspirin + fosinopril     | 7  | Aspirin, fosinopril. pharmacodynamic antagonism. Avoid or Use Alternate Drug. Co-administration may result in a significant decrease in renal function. NSAIDs may diminish the antihypertensive effect of ACE inhibitors. The mechanism of these interactions is likely related to the ability of NSAIDs to reduce the synthesis of vasodilating renal prostaglandins  |
| bisoprolol + digoxin     | 6  | Bisoprolol increases effects of digoxin by pharmacodynamic synergism. Use Caution/Monitor. Enhanced bradycardia                                                                                                                                                                                                                                                         |
| candesartan + captopril  | 6  | Candesartan, captopril. Either increases toxicity of the other by pharmacodynamic synergism. Avoid or Use Alternate Drug. Dual blockade of renin-angiotensin system increases risks of hypotension, hyperkalemia, and renal impairment                                                                                                                                  |

|                            |   |                                                                                                                                                                                                                                                                                                                                                                                                        |
|----------------------------|---|--------------------------------------------------------------------------------------------------------------------------------------------------------------------------------------------------------------------------------------------------------------------------------------------------------------------------------------------------------------------------------------------------------|
| azilsartan + captopril     | 5 | Azilsartan, captopril. Either increases toxicity of the other by pharmacodynamic synergism. Avoid or Use Alternate Drug. Dual blockade of renin-angiotensin system increases risks of hypotension, hyperkalemia, and renal impairment                                                                                                                                                                  |
| captopril + valsartan      | 5 | Valsartan, captopril. Either increases toxicity of the other by pharmacodynamic synergism. Avoid or Use Alternate Drug. Dual blockade of renin-angiotensin system increases risks of hypotension, hyperkalemia, and renal impairment                                                                                                                                                                   |
| amlodipine + nifedipine    | 4 | Nifedipine will increase the level or effect of amlodipine by affecting hepatic/intestinal enzyme CYP3A4 metabolism. Avoid or Use Alternate Drug                                                                                                                                                                                                                                                       |
| apixaban + clopidogrel     | 3 | Clopidogrel and apixaban both increase anticoagulation. Avoid or Use Alternate Drug                                                                                                                                                                                                                                                                                                                    |
| captopril + telmisartan    | 3 | Telmisartan, captopril. Either increases toxicity of the other by pharmacodynamic synergism. Avoid or Use Alternate Drug. Dual blockade of renin-angiotensin system increases risks of hypotension, hyperkalemia, and renal impairment                                                                                                                                                                 |
| ibuprofen + naproxen       | 3 | Ibuprofen will increase the level or effect of naproxen by acidic (anionic) drug competition for renal tubular clearance. Avoid or Use Alternate Drug. Therapeutic duplication. ibuprofen and naproxen both increase anticoagulation. Avoid or Use Alternate Drug. Therapeutic duplication. ibuprofen and naproxen both increase anticoagulation. Avoid or Use Alternate Drug. Therapeutic duplication |
| apixaban + rivaroxaban     | 2 | Rivaroxaban and apixaban both increase anticoagulation. Avoid or Use Alternate Drug                                                                                                                                                                                                                                                                                                                    |
| aspirin + ramipril         | 2 | Aspirin, ramipril. pharmacodynamic antagonism. Avoid or Use Alternate Drug. Co-administration may result in a significant decrease in renal function. NSAIDs may diminish the antihypertensive effect of ACE inhibitors. The mechanism of these interactions is likely related to the ability of NSAIDs to reduce the synthesis of vasodilating renal prostaglandins                                   |
| bisoprolol + nebivolol     | 2 | Bisoprolol and nebivolol both increase anti-hypertensive channel blocking. Avoid or Use Alternate Drug                                                                                                                                                                                                                                                                                                 |
| bisoprolol + timolol       | 2 | Bisoprolol and timolol both increase anti-hypertensive channel blocking. Avoid or Use Alternate Drug                                                                                                                                                                                                                                                                                                   |
| digoxin + metoprolol       | 2 | Digoxin increases toxicity of metoprolol by unspecified interaction mechanism. Avoid or Use Alternate Drug. Can increase risk of bradycardia                                                                                                                                                                                                                                                           |
| digoxin + pantoprazole     | 2 | Pantoprazole will increase the level or effect of digoxin by increasing gastric pH. Applies only to oral form of both agents. Avoid or Use Alternate Drug                                                                                                                                                                                                                                              |
| potassium + spironolactone | 2 | Spironolactone and potassium chloride both increase serum potassium. Avoid or Use Alternate Drug                                                                                                                                                                                                                                                                                                       |
| aspirin + ibuprofen        | 2 | Ibuprofen increases toxicity of aspirin by anticoagulation. Avoid or Use Alternate Drug. increases risk of bleeding. ibuprofen decreases effects of aspirin by Other (see comment). Avoid or Use Alternate Drug. Comment: Ibuprofen decreases the antiplatelet effects of low-dose aspirin by blocking the active site                                                                                 |



|                              |   |                                                                                                                                                                                                                                                                                                                                                                            |
|------------------------------|---|----------------------------------------------------------------------------------------------------------------------------------------------------------------------------------------------------------------------------------------------------------------------------------------------------------------------------------------------------------------------------|
|                              |   | of platelet cyclooxygenase. Administer ibuprofen 8 h before aspirin or at least 2-4 h after aspirin. The effect of other NSAIDs on aspirin is not established                                                                                                                                                                                                              |
| amiodarone + carbamazepine   | 1 | Carbamazepine will decrease the level or effect of amiodarone by affecting hepatic/intestinal enzyme CYP3A4 metabolism. Avoid or Use Alternate Drug                                                                                                                                                                                                                        |
| amlodipine + simvastatin     | 1 | Amlodipine increases levels of simvastatin by Other (see comment). Avoid or Use Alternate Drug. Comment: Benefits of combination therapy should be carefully weighed against the potential risks of combination. Potential for increased risk of myopathy/rhabdomyolysis. Limit simvastatin dose to no more than 20 mg/day when used concurrently                          |
| atorvastatin + carbamazepine | 1 | Carbamazepine will decrease the level or effect of atorvastatin by affecting hepatic/intestinal enzyme CYP3A4 metabolism. Avoid or Use Alternate Drug                                                                                                                                                                                                                      |
| atorvastatin + niacin        | 1 | Niacin, atorvastatin. Either increases toxicity of the other by pharmacodynamic synergism. Avoid or Use Alternate Drug. Increased risk of rhabdomyolysis (>1 g/day niacin)                                                                                                                                                                                                 |
| budesonide + clarithromycin  | 1 | Clarithromycin will increase the level or effect of budesonide by affecting hepatic/intestinal enzyme CYP3A4 metabolism. Avoid or Use Alternate Drug                                                                                                                                                                                                                       |
| captopril + ketoprofen       | 1 | Ketoprofen, captopril. pharmacodynamic antagonism. Avoid or Use Alternate Drug. Co-administration may result in a significant decrease in renal function. NSAIDs may diminish the antihypertensive effect of ACE inhibitors. The mechanism of these interactions is likely related to the ability of NSAIDs to reduce the synthesis of vasodilating renal prostaglandins   |
| captopril + meloxicam        | 1 | Meloxicam, captopril. pharmacodynamic antagonism. Avoid or Use Alternate Drug. Co-administration may result in a significant decrease in renal function. NSAIDs may diminish the antihypertensive effect of ACE inhibitors. The mechanism of these interactions is likely related to the ability of NSAIDs to reduce the synthesis of vasodilating renal prostaglandins    |
| celecoxib + lisinopril       | 1 | Celecoxib, lisinopril. pharmacodynamic antagonism. Avoid or Use Alternate Drug. Co-administration may result in a significant decrease in renal function. NSAIDs may diminish the antihypertensive effect of ACE inhibitors. The mechanism of these interactions is likely related to the ability of NSAIDs to reduce the synthesis of vasodilating renal prostaglandins   |
| clopidogrel + esomeprazole   | 1 | Esomeprazole decreases effects of clopidogrel by affecting hepatic enzyme CYP2C19 metabolism. Avoid or Use Alternate Drug. Clopidogrel efficacy may be reduced by drugs that inhibit CYP2C19. Inhibition of platelet aggregation by clopidogrel is entirely due to an active metabolite. Clopidogrel is metabolized to this active metabolite in part by CYP2C19           |
| diclofenac + perindopril     | 1 | Diclofenac, perindopril. pharmacodynamic antagonism. Avoid or Use Alternate Drug. Co-administration may result in a significant decrease in renal function. NSAIDs may diminish the antihypertensive effect of ACE inhibitors. The mechanism of these interactions is likely related to the ability of NSAIDs to reduce the synthesis of vasodilating renal prostaglandins |
| digoxin + esomeprazole       | 1 | Esomeprazole will increase the level or effect of digoxin by increasing gastric pH. Applies only to oral form of both agents. Avoid or Use Alternate Drug                                                                                                                                                                                                                  |
| digoxin + omeprazole         | 1 | Esomeprazole will increase the level or effect of digoxin by increasing gastric                                                                                                                                                                                                                                                                                            |

|                            |   |                                                                                                                                                                                                                                                                                                                                                                                  |
|----------------------------|---|----------------------------------------------------------------------------------------------------------------------------------------------------------------------------------------------------------------------------------------------------------------------------------------------------------------------------------------------------------------------------------|
|                            |   | pH. Applies only to oral form of both agents. Avoid or Use Alternate Drug                                                                                                                                                                                                                                                                                                        |
| fenofibrate + pitavastatin | 1 | Fenofibrate, pitavastatin. Either increases effects of the other by pharmacodynamic synergism. Avoid or Use Alternate Drug. Fenofibrate may further increase risk for rhabdomyolysis when added to optimal statin regimen to further decrease TG and increase HDLs                                                                                                               |
| ibuprofen + lisinopril     | 1 | Ibuprofen, lisinopril. pharmacodynamic antagonism. Avoid or Use Alternate Drug. Co-administration may result in a significant decrease in renal function. NSAIDs may diminish the antihypertensive effect of ACE inhibitors. The mechanism of these interactions is likely related to the ability of NSAIDs to reduce the synthesis of vasodilating renal prostaglandins         |
| ketoprofen + ramipril      | 1 | Ketoprofen, ramipril. pharmacodynamic antagonism. Avoid or Use Alternate Drug. Co-administration may result in a significant decrease in renal function. NSAIDs may diminish the antihypertensive effect of ACE inhibitors. The mechanism of these interactions is likely related to the ability of NSAIDs to reduce the synthesis of vasodilating renal prostaglandins          |
| lisinopril + losartan      | 1 | Losartan, lisinopril. Either increases toxicity of the other by pharmacodynamic synergism. Avoid or Use Alternate Drug. Dual blockade of renin-angiotensin system increases risks of hypotension, hyperkalemia, and renal impairment                                                                                                                                             |
| meloxicam + perindopril    | 1 | Meloxicam, perindopril. pharmacodynamic antagonism. Avoid or Use Alternate Drug. Co-administration may result in a significant decrease in renal function. NSAIDs may diminish the antihypertensive effect of ACE inhibitors. The mechanism of these interactions is likely related to the ability of NSAIDs to reduce the synthesis of vasodilating renal prostaglandins        |
| methotrexate + naproxen    | 1 | Naproxen increases levels of methotrexate by decreasing renal clearance. Avoid or Use Alternate Drug. Concomitant administration of NSAIDs with high dose methotrexate has been reported to elevate and prolong serum methotrexate levels, resulting in deaths from severe hematologic and GI toxicity. NSAIDs may reduce tubular secretion of methotrexate and enhance toxicity |

**\*Note:** Impact of drug-drug interactions associated with the combinations 'aspirin + captopril' and 'aspirin + enalapril' may be considered insignificant due to the use of low-dose aspirin in the majority of cases. Administration of aspirin at doses less than 300 mg per day has little effect on the effectiveness of captopril and enalapril. Administration of aspirin in higher doses reduces the effectiveness of captopril and enalapril.

**Table S6.** The detailed explanation of the entire list of pairwise monitor-closely drug-drug interactions among prescribed drugs in the cohort of cardiovascular patients based on data of electronic health records in 2019-2022 ( $n = 704$ ).

| Drug combination           | n   | Monitor-closely drug-drug interactions (P-List)                                                                                                                                                                                                                                                                                                                       |
|----------------------------|-----|-----------------------------------------------------------------------------------------------------------------------------------------------------------------------------------------------------------------------------------------------------------------------------------------------------------------------------------------------------------------------|
| aspirin + bisoprolol       | 180 | Aspirin decreases effects of bisoprolol by pharmacodynamic antagonism. Use Caution/Monitor. Long term (>1 wk) NSAID use. NSAIDs decrease prostaglandin synthesis                                                                                                                                                                                                      |
| aspirin + losartan         | 168 | Aspirin decreases effects of losartan by pharmacodynamic antagonism. Modify Therapy/Monitor Closely. NSAIDs decrease synthesis of vasodilating renal prostaglandins, and thus affect fluid homeostasis and may diminish antihypertensive effect                                                                                                                       |
| aspirin + metoprolol       | 86  | Aspirin decreases effects of metoprolol by pharmacodynamic antagonism. Use Caution/Monitor. Long term (>1 wk) NSAID use. NSAIDs decrease prostaglandin synthesis                                                                                                                                                                                                      |
| bisoprolol + losartan      | 82  | Bisoprolol, losartan. Mechanism: pharmacodynamic synergism. Use Caution/Monitor. Risk of fetal compromise if given during pregnancy                                                                                                                                                                                                                                   |
| aspirin + captopril*       | 62  | Aspirin, captopril. pharmacodynamic antagonism. Avoid or Use Alternate Drug. Co-administration may result in a significant decrease in renal function. NSAIDs may diminish the antihypertensive effect of ACE inhibitors. The mechanism of these interactions is likely related to the ability of NSAIDs to reduce the synthesis of vasodilating renal prostaglandins |
| aspirin + spironolactone   | 62  | Aspirin decreases effects of spironolactone by unspecified interaction mechanism. Use Caution/Monitor. When used concomitantly, spironolactone dose may need to be titrated to higher maintenance dose and the patient should be observed closely to determine if the desired effect is obtained                                                                      |
| aspirin + nitroglycerin    | 61  | Aspirin increases effects of nitroglycerin sublingual by additive vasodilation. Use Caution/Monitor. Vasodilatory and hemodynamic effects of NTG may be enhanced by co-administration with aspirin (additive effect desirable for emergent treatment)                                                                                                                 |
| spironolactone + torsemide | 56  | Spironolactone increases and torsemide decreases serum potassium. Effect of interaction is not clear, use caution. Modify Therapy/Monitor Closely                                                                                                                                                                                                                     |
| bisoprolol + torsemide     | 55  | Bisoprolol increases and torsemide decreases serum potassium. Effect of interaction is not clear, use caution. Use Caution/Monitor                                                                                                                                                                                                                                    |
| aspirin + clopidogrel      | 46  | Aspirin, clopidogrel. Either increases toxicity of the other by pharmacodynamic synergism. Use Caution/Monitor. The need for simultaneous use of low-dose aspirin and anticoagulant or antiplatelet agents are common for patients with cardiovascular disease; monitor closely                                                                                       |
| aspirin + torsemide        | 43  | Aspirin increases and torsemide decreases serum potassium. Effect of interaction is not clear, use caution. Use Caution/Monitor                                                                                                                                                                                                                                       |
| amlodipine + bisoprolol    | 41  | Bisoprolol, amlodipine. Either increases effects of the other by pharmacodynamic synergism. Use Caution/Monitor. Both drugs lower blood pressure                                                                                                                                                                                                                      |
| losartan + torsemide       | 41  | Losartan increases and torsemide decreases serum potassium. Effect of interaction is not clear, use caution. Use Caution/Monitor                                                                                                                                                                                                                                      |

|                             |    |                                                                                                                                                                                                                                                                                                                                                                         |
|-----------------------------|----|-------------------------------------------------------------------------------------------------------------------------------------------------------------------------------------------------------------------------------------------------------------------------------------------------------------------------------------------------------------------------|
| captopril + torsemide       | 38 | Captopril, torsemide. Either increases toxicity of the other by Mechanism: pharmacodynamic synergism. Use Caution/ Monitor. Risk of acute hypotension, renal insufficiency. Monitor blood pressure and renal function                                                                                                                                                   |
| losartan + metoprolol       | 38 | Losartan and metoprolol both increase serum potassium. Use Caution/Monitor                                                                                                                                                                                                                                                                                              |
| aspirin + candesartan       | 36 | Aspirin decreases effects of candesartan by pharmacodynamic antagonism. Modify Therapy/Monitor Closely. NSAIDs decrease synthesis of vasodilating renal prostaglandins, and thus affect fluid homeostasis and may diminish antihypertensive effect                                                                                                                      |
| aspirin + perindopril       | 35 | Aspirin, perindopril. pharmacodynamic antagonism. Avoid or Use Alternate Drug. Co-administration may result in a significant decrease in renal function. NSAIDs may diminish the antihypertensive effect of ACE inhibitors. The mechanism of these interactions is likely related to the ability of NSAIDs to reduce the synthesis of vasodilating renal prostaglandins |
| amiodarone + atorvastatin   | 34 | Amiodarone will increase the level or effect of atorvastatin by P-glycoprotein (MDR1) efflux transporter. Use Caution/Monitor                                                                                                                                                                                                                                           |
| amiodarone + losartan       | 34 | Amiodarone will increase the level or effect of losartan by affecting hepatic enzyme CYP2C9/10 metabolism. Use Caution/Monitor. May inhibit the conversion of losartan to its active metabolite E-3174. Importance of interaction not established; monitor individual therapeutic response to determine losartan dosage                                                 |
| aspirin + lisinopril        | 34 | Aspirin, lisinopril. pharmacodynamic antagonism. Avoid or Use Alternate Drug. Co-administration may result in a significant decrease in renal function. NSAIDs may diminish the antihypertensive effect of ACE inhibitors. The mechanism of these interactions is likely related to the ability of NSAIDs to reduce the synthesis of vasodilating renal prostaglandins  |
| bisoprolol + spironolactone | 32 | Bisoprolol and spironolactone both increase serum potassium. Modify Therapy/Monitor Closely                                                                                                                                                                                                                                                                             |
| amlodipine + nitroglycerin  | 30 | Amlodipine, nitroglycerin sublingual. Either increases toxicity of the other by additive vasodilation. Modify Therapy/ Monitor Closely. Marked orthostatic hypotension reported with concomitant use                                                                                                                                                                    |
| aspirin + indapamide        | 30 | Aspirin increases and indapamide decreases serum potassium. Effect of interaction is not clear, use caution. Use Caution/Monitor                                                                                                                                                                                                                                        |
| losartan + omeprazole       | 27 | Omeprazole will increase the level or effect of losartan by affecting hepatic enzyme CYP2C9/10 metabolism. Use Caution/Monitor. May inhibit the conversion of losartan to its active metabolite E-3174. Importance of interaction not established; monitor individual therapeutic response to determine losartan dosage                                                 |
| bisoprolol + indapamide     | 26 | Bisoprolol increases and indapamide decreases serum potassium. Effect of interaction is not clear, use caution. Use Caution/Monitor                                                                                                                                                                                                                                     |
| lisinopril + spironolactone | 26 | Lisinopril, spironolactone. Mechanism: pharmacodynamic synergism. Use Caution/Monitor. Risk of hyperkalemia                                                                                                                                                                                                                                                             |
| lisinopril + torsemide      | 26 | Lisinopril, torsemide. Mechanism: pharmacodynamic synergism. Use Cau-                                                                                                                                                                                                                                                                                                   |

|                                  |    |                                                                                                                                                                                                                                                                                                                                          |
|----------------------------------|----|------------------------------------------------------------------------------------------------------------------------------------------------------------------------------------------------------------------------------------------------------------------------------------------------------------------------------------------|
|                                  |    | tion/Monitor. Risk of acute hypotension, renal insufficiency                                                                                                                                                                                                                                                                             |
| captopril + spironolactone       | 25 | Captopril, spironolactone. Either increases toxicity of the other by Mechanism: pharmacodynamic synergism. Use Caution/ Monitor. Both drugs lower blood pressure. Risk of hyperkalemia. Monitor blood pressure and potassium                                                                                                             |
| aspirin + valsartan              | 24 | Aspirin decreases effects of valsartan by pharmacodynamic antagonism. Modify Therapy/Monitor Closely. NSAIDs decrease synthesis of vasodilating renal prostaglandins, and thus affect fluid homeostasis and may diminish antihypertensive effect                                                                                         |
| losartan + spironolactone        | 24 | Losartan and spironolactone both increase serum potassium. Modify Therapy/ Monitor Closely                                                                                                                                                                                                                                               |
| aspirin + carvedilol             | 22 | Aspirin decreases effects of carvedilol by pharmacodynamic antagonism. Use Caution/Monitor. Long term (>1 wk) NSAID use. NSAIDs decrease prostaglandin synthesis                                                                                                                                                                         |
| atorvastatin + valsartan         | 22 | Atorvastatin will increase the level or effect of valsartan by Other (see comment). Use Caution/Monitor. The results from an in vitro study with human liver tissue indicate that valsartan is a substrate of the hepatic uptake transporter OATP1B1; co-administration with OATP1B1 inhibitors may increase valsartan systemic exposure |
| captopril + potassium            | 22 | Captopril increases levels of potassium chloride by decreasing elimination. Use Caution/ Monitor. Risk of hyperkalemia                                                                                                                                                                                                                   |
| indapamide + losartan            | 21 | Losartan increases and indapamide decreases serum potassium. Effect of interaction is not clear, use caution. Use Caution/Monitor                                                                                                                                                                                                        |
| candesartan + metoprolol         | 20 | Candesartan and metoprolol both increase serum potassium. Use Caution/Monitor                                                                                                                                                                                                                                                            |
| clopidogrel + rivaroxaban        | 19 | Rivaroxaban, clopidogrel. Other (see comment). Use Caution/Monitor. Comment: Avoid concurrent administration of clopidogrel with rivaroxaban unless the benefit outweighs the risk of increased bleeding                                                                                                                                 |
| digoxin + spironolactone         | 18 | Spironolactone increases levels of digoxin by Other (see comment). Use Caution/Monitor. Comment: Spironolactone may cause false elevation of digoxin assay                                                                                                                                                                               |
| digoxin + torsemide              | 18 | Digoxin increases and torsemide decreases serum potassium. Effect of interaction is not clear, use caution. Use Caution/Monitor                                                                                                                                                                                                          |
| hydrochlorothiazide + metoprolol | 18 | Hydrochlorothiazide, metoprolol. Either increases toxicity of the other by Other (see comment). Modify Therapy/Monitor Closely. Comment: May cause idiosyncratic reaction, resulting in acute transient myopia and acute angle-closure glaucoma, which can lead to permanent vision loss                                                 |
| captopril + indapamide           | 16 | Indapamide, captopril. Either increases effects of the other by pharmacodynamic synergism. Use Caution/Monitor. Both drugs lower blood pressure. Increased risk of nephrotoxicity. Monitor blood pressure and renal function                                                                                                             |
| aspirin + potassium              | 15 | Aspirin and potassium acid phosphate both increase serum potassium. Modify Therapy/Monitor Closely                                                                                                                                                                                                                                       |
| aspirin + telmisartan            | 15 | Aspirin decreases effects of telmisartan by pharmacodynamic antagonism.                                                                                                                                                                                                                                                                  |

|                               |    |                                                                                                                                                                                                                                                                                                                   |
|-------------------------------|----|-------------------------------------------------------------------------------------------------------------------------------------------------------------------------------------------------------------------------------------------------------------------------------------------------------------------|
|                               |    | Modify Therapy/Monitor Closely. NSAIDs decrease synthesis of vasodilating renal prostaglandins, and thus affect fluid homeostasis and may diminish antihypertensive effect                                                                                                                                        |
| metoprolol + spironolactone   | 15 | Metoprolol and spironolactone both increase serum potassium. Modify Therapy/Monitor Closely                                                                                                                                                                                                                       |
| metoprolol + torsemide        | 15 | Metoprolol increases and torsemide decreases serum potassium. Effect of interaction is not clear, use caution. Use Caution/Monitor                                                                                                                                                                                |
| amiodarone + captopril        | 14 | Amiodarone, captopril. Either increases effects of the other by pharmacodynamic synergism. Use Caution/Monitor. Both drugs lower blood pressure. Monitor blood pressure                                                                                                                                           |
| amlodipine + metformin        | 14 | Amlodipine decreases effects of metformin by pharmacodynamic antagonism. Use Caution/Monitor. Patient should be closely observed for loss of blood glucose control; when drugs are withdrawn from a patient receiving metformin, patient should be observed closely for hypoglycemia                              |
| bisoprolol + candesartan      | 14 | Bisoprolol, candesartan. Mechanism: pharmacodynamic synergism. Use Caution/Monitor. Risk of fetal compromise if given during pregnancy                                                                                                                                                                            |
| bisoprolol + digoxin          | 14 | Bisoprolol increases effects of digoxin by pharmacodynamic synergism. Use Caution/Monitor. Enhanced bradycardia                                                                                                                                                                                                   |
| bisoprolol + valsartan        | 14 | Bisoprolol, valsartan. Mechanism: pharmacodynamic synergism. Use Caution/Monitor. Risk of fetal compromise if given during pregnancy                                                                                                                                                                              |
| metformin + torsemide         | 14 | Torsemide decreases effects of metformin by pharmacodynamic antagonism. Use Caution/Monitor                                                                                                                                                                                                                       |
| amiodarone + warfarin         | 13 | Amiodarone will increase the level or effect of warfarin by affecting hepatic enzyme CYP2C9/10 metabolism. Modify Therapy/Monitor Closely. Co-administration increases INR by 100% after 3-4 days. Reduce warfarin dose by one-third to one-half and monitor INR                                                  |
| aspirin + hydrochlorothiazide | 13 | Aspirin increases and hydrochlorothiazide decreases serum potassium. Effect of interaction is not clear, use caution. Use Caution/Monitor                                                                                                                                                                         |
| aspirin + insulin             | 13 | Aspirin increases effects of insulin aspart by pharmacodynamic synergism. Modify Therapy/Monitor Closely. Co-administration of insulin with high doses of salicylates (3 g/day or more) may increase risk for hypoglycemia. Insulin dose adjustment and increased frequency of glucose monitoring may be required |
| aspirin + olmesartan          | 12 | Aspirin decreases effects of olmesartan by pharmacodynamic antagonism. Modify Therapy/ Monitor Closely. NSAIDs decrease synthesis of vasodilating renal prostaglandins, and thus affect fluid homeostasis and may diminish antihypertensive effect                                                                |
| aspirin + ticagrelor          | 12 | Aspirin, ticagrelor. Other (see comment). Use Caution/Monitor. Comment: Maintenance doses of aspirin above 100 mg decreases effectiveness of ticagrelor. Therefore, after the initial loading dose of aspirin (usually 325 mg), use ticagrelor with a maintenance dose of aspirin of 75-100 mg                    |
| atorvastatin + ranolazine     | 12 | Ranolazine will increase the level or effect of atorvastatin by P-glycoprotein (MDR1) efflux transporter. Use Caution/Monitor                                                                                                                                                                                     |

|                             |    |                                                                                                                                                                                                                                                                                                                                                                                                                                                                                                                                                                                        |
|-----------------------------|----|----------------------------------------------------------------------------------------------------------------------------------------------------------------------------------------------------------------------------------------------------------------------------------------------------------------------------------------------------------------------------------------------------------------------------------------------------------------------------------------------------------------------------------------------------------------------------------------|
| losartan + nebivolol        | 12 | Losartan and nebivolol both increase serum potassium. Use Caution/Monitor                                                                                                                                                                                                                                                                                                                                                                                                                                                                                                              |
| bisoprolol + potassium      | 11 | Bisoprolol and potassium chloride both increase serum potassium. Modify Therapy/ Monitor Closely                                                                                                                                                                                                                                                                                                                                                                                                                                                                                       |
| perindopril + torsemide     | 11 | Perindopril, torsemide. Mechanism: pharmacodynamic synergism. Use Caution/Monitor. Risk of acute hypotension, renal insufficiency                                                                                                                                                                                                                                                                                                                                                                                                                                                      |
| aspirin + azilsartan        | 10 | Aspirin, azilsartan. Either increases toxicity of the other by Other (see comment). Use Caution/Monitor. Comment: May result in renal function deterioration, particularly in elderly or volume depleted individuals. aspirin decreases effects of azilsartan by pharmacodynamic antagonism. Modify Therapy/Monitor Closely. NSAIDs decrease synthesis of vasodilating renal prostaglandins, and thus affect fluid homeostasis and may diminish antihypertensive effect                                                                                                                |
| clopidogrel + ticagrelor    | 10 | Ticagrelor, clopidogrel. Either increases effects of the other by Other (see comment). Use Caution/ Monitor. Comment: Increased risk of bleeding during concomitant use of medications that increase potential for bleeding                                                                                                                                                                                                                                                                                                                                                            |
| sotalol + torsemide         | 10 | Sotalol increases and torsemide decreases serum potassium. Effect of interaction is not clear, use caution. Use Caution/Monitor                                                                                                                                                                                                                                                                                                                                                                                                                                                        |
| amiodarone + bisoprolol     | 9  | Amiodarone, bisoprolol. Mechanism: pharmacodynamic synergism. Use Caution/Monitor. Risk of cardiotoxicity with bradycardia                                                                                                                                                                                                                                                                                                                                                                                                                                                             |
| amiodarone + rivaroxaban    | 9  | Amiodarone increases levels of rivaroxaban by affecting hepatic/intestinal enzyme CYP3A4 metabolism. Use Caution/Monitor. Patients with renal impairment receiving rivaroxaban with drugs that are combined P-gp and weak or moderate CYP3A4 inhibitors may have significant increases in exposure compared with patients with normal renal function and no inhibitor use, since both pathways of rivaroxaban elimination are affected. Since these increases may increase bleeding risk, use rivaroxaban in this situation only if the potential benefit justifies the potential risk |
| amlodipine + carvedilol     | 9  | Carvedilol and amlodipine both increase anti-hypertensive channel blocking. Modify Therapy/Monitor Closely                                                                                                                                                                                                                                                                                                                                                                                                                                                                             |
| fosinopril + torsemide      | 9  | Fosinopril, torsemide. Mechanism: pharmacodynamic synergism. Use Caution/Monitor. Risk of acute hypotension, renal insufficiency                                                                                                                                                                                                                                                                                                                                                                                                                                                       |
| furosemide + spironolactone | 9  | Spironolactone increases and furosemide decreases serum potassium. Effect of interaction is not clear, use caution. Modify Therapy/Monitor Closely                                                                                                                                                                                                                                                                                                                                                                                                                                     |
| amlodipine + sotalol        | 8  | Sotalol and amlodipine both increase anti-hypertensive channel blocking. Modify Therapy/Monitor Closely                                                                                                                                                                                                                                                                                                                                                                                                                                                                                |
| aspirin + nebivolol         | 8  | Aspirin decreases effects of nebivolol by pharmacodynamic antagonism. Use Caution/ Monitor. Long term (>1 wk) NSAID use. NSAIDs decrease prostaglandin synthesis                                                                                                                                                                                                                                                                                                                                                                                                                       |
| aspirin + prasugrel         | 8  | Aspirin, prasugrel. Either increases toxicity of the other by pharmacodynamic synergism. Use Caution/ Monitor. The need for simultaneous use of low-dose aspirin and anticoagulant or antiplatelet agents are common for patients with cardiovascular disease; monitor closely                                                                                                                                                                                                                                                                                                         |
| aspirin + rivaroxaban       | 8  | Aspirin, rivaroxaban. Either increases toxicity of the other by anticoagulation.                                                                                                                                                                                                                                                                                                                                                                                                                                                                                                       |

|                              |   |                                                                                                                                                                                                                                                                                                                                                                                                                                             |
|------------------------------|---|---------------------------------------------------------------------------------------------------------------------------------------------------------------------------------------------------------------------------------------------------------------------------------------------------------------------------------------------------------------------------------------------------------------------------------------------|
|                              |   | Use Caution/Monitor. Both drugs have the potential to cause bleeding. The need for simultaneous use of low-dose aspirin (<100 mg/day) with anticoagulants are common for patients with cardiovascular disease, but may result in increased bleeding; monitor closely. Promptly evaluate any signs or symptoms of blood loss if treated concomitantly with low-dose aspirin. Avoid co-administration with chronic use of higher dose aspirin |
| atorvastatin + nifedipine    | 8 | Nifedipine will increase the level or effect of atorvastatin by affecting hepatic/intestinal enzyme CYP3A4 metabolism. Use Caution/Monitor. nifedipine will decrease the level or effect of atorvastatin by P-glycoprotein (MDR1) efflux transporter. Use Caution/Monitor                                                                                                                                                                   |
| bisoprolol + formoterol      | 8 | Bisoprolol decreases effects of formoterol by pharmacodynamic antagonism. Use Caution/Monitor                                                                                                                                                                                                                                                                                                                                               |
| bisoprolol + telmisartan     | 8 | Bisoprolol, telmisartan. Mechanism: pharmacodynamic synergism. Use Caution/Monitor. Risk of fetal compromise if given during pregnancy                                                                                                                                                                                                                                                                                                      |
| candesartan + sotalol        | 8 | Candesartan and sotalol both increase serum potassium. Use Caution/Monitor                                                                                                                                                                                                                                                                                                                                                                  |
| candesartan + spironolactone | 8 | Candesartan and spironolactone both increase serum potassium. Modify Therapy/Monitor Closely                                                                                                                                                                                                                                                                                                                                                |
| clopidogrel + felodipine     | 8 | Felodipine decreases effects of clopidogrel by decreasing metabolism. Use Caution/Monitor. Cytochrome P450 2C19 inhibitors decrease the conversion of clopidogrel to its active form                                                                                                                                                                                                                                                        |
| indapamide + torsemide       | 8 | Torsemide and indapamide both decrease serum potassium. Use Caution/Monitor                                                                                                                                                                                                                                                                                                                                                                 |
| lisinopril + metformin       | 8 | Lisinopril increases toxicity of metformin by unspecified interaction mechanism. Use Caution/Monitor. Increases risk for hypoglycemia and lactic acidosis                                                                                                                                                                                                                                                                                   |
| meloxicam + perindopril      | 8 | Meloxicam, perindopril. pharmacodynamic antagonism. Avoid or Use Alternate Drug. Co-administration may result in a significant decrease in renal function. NSAIDs may diminish the antihypertensive effect of ACE inhibitors. The mechanism of these interactions is likely related to the ability of NSAIDs to reduce the synthesis of vasodilating renal prostaglandins                                                                   |
| metoprolol + olmesartan      | 8 | Metoprolol, olmesartan. Mechanism: pharmacodynamic synergism. Use Caution/ Monitor. Risk of fetal compromise if given during pregnancy                                                                                                                                                                                                                                                                                                      |
| sotalol + spironolactone     | 8 | Sotalol and spironolactone both increase serum potassium. Modify Therapy/Monitor Closely                                                                                                                                                                                                                                                                                                                                                    |
| aspirin + enalapril*         | 7 | Aspirin, enalapril. Pharmacodynamic antagonism. Avoid or Use Alternate Drug. Co-administration may result in a significant decrease in renal function. NSAIDs may diminish the antihypertensive effect of ACE inhibitors. The mechanism of these interactions is likely related to the ability of NSAIDs to reduce the synthesis of vasodilating renal prostaglandins                                                                       |
| aspirin + fosinopril         | 7 | Aspirin, fosinopril. Pharmacodynamic antagonism. Avoid or Use Alternate Drug. Co-administration may result in a significant decrease in renal function. NSAIDs may diminish the antihypertensive effect of ACE inhibitors. The mechanism of these interactions is likely related to the ability of NSAIDs to                                                                                                                                |



|                                       |   |                                                                                                                                                                                                                                                                                                                                                                                                                                                                                                                                                                                                                                           |
|---------------------------------------|---|-------------------------------------------------------------------------------------------------------------------------------------------------------------------------------------------------------------------------------------------------------------------------------------------------------------------------------------------------------------------------------------------------------------------------------------------------------------------------------------------------------------------------------------------------------------------------------------------------------------------------------------------|
|                                       |   | reduce the synthesis of vasodilating renal prostaglandins                                                                                                                                                                                                                                                                                                                                                                                                                                                                                                                                                                                 |
| atorvastatin + dabigatran             | 7 | Atorvastatin will increase the level or effect of dabigatran by P-glycoprotein (MDR1) efflux transporter. Use Caution/Monitor. Atrial fibrillation: Avoid co-administering dabigatran with P-gp inhibitors if CrCl <30 mL/min. DVT/PE treatment: Avoid co-administering dabigatran with P-gp inhibitors if CrCl <50 mL/min                                                                                                                                                                                                                                                                                                                |
| bisoprolol + felodipine               | 7 | Bisoprolol and felodipine both increase anti-hypertensive channel blocking. Modify Therapy/Monitor Closely                                                                                                                                                                                                                                                                                                                                                                                                                                                                                                                                |
| bisoprolol + nifedipine               | 7 | Bisoprolol, nifedipine. Either decreases effects of the other by pharmacodynamic synergism. Use Caution/Monitor. Both drugs lower blood pressure                                                                                                                                                                                                                                                                                                                                                                                                                                                                                          |
| candesartan + torsemide               | 7 | Candesartan increases and torsemide decreases serum potassium. Effect of interaction is not clear, use caution. Use Caution/Monitor                                                                                                                                                                                                                                                                                                                                                                                                                                                                                                       |
| captopril + isosorbide di/mononitrate | 7 | Isosorbide mononitrate, captopril. Either increases effects of the other by pharmacodynamic synergism. Use Caution/ Monitor. Both drugs lower blood pressure. Monitor blood pressure. isosorbide dinitrate, captopril. Either increases effects of the other by pharmacodynamic synergism. Use Caution/ Monitor. Both drugs lower blood pressure. Monitor blood pressure                                                                                                                                                                                                                                                                  |
| captopril + metformin                 | 7 | Captopril increases toxicity of metformin by unspecified interaction mechanism. Use Caution/ Monitor. Increases risk for hypoglycemia and lactic acidosis                                                                                                                                                                                                                                                                                                                                                                                                                                                                                 |
| clopidogrel + pantoprazole            | 7 | Pantoprazole decreases effects of clopidogrel by affecting hepatic enzyme CYP2C19 metabolism. Use Caution/Monitor. Clopidogrel efficacy may be reduced by drugs that inhibit CYP2C19. Inhibition of platelet aggregation by clopidogrel is entirely due to the active clopidogrel metabolite. Clopidogrel is metabolized in part by CYP2C19. Pantoprazole prescribing information state that co-administration with clopidogrel had no clinically important effect on exposure to clopidogrel active metabolite; no dose adjustment of clopidogrel is required                                                                            |
| losartan + potassium                  | 7 | Losartan and potassium chloride both increase serum potassium. Use Caution/Monitor                                                                                                                                                                                                                                                                                                                                                                                                                                                                                                                                                        |
| rosuvastatin + warfarin               | 7 | Rosuvastatin increases effects of warfarin by anticoagulation. Use Caution/Monitor                                                                                                                                                                                                                                                                                                                                                                                                                                                                                                                                                        |
| amiodarone + carvedilol               | 6 | Amiodarone will increase the level or effect of carvedilol by affecting hepatic enzyme CYP2C9/ 10 metabolism. Use Caution/Monitor. amiodarone will increase the level or effect of carvedilol by affecting hepatic enzyme CYP2D6 metabolism. Use Caution/ Monitor. Monitor for signs of bradycardia or heart block when amiodarone and a beta adrenergic blocker are co-administered. Amiodarone should be used with caution in patients receiving a beta adrenergic blocker, particularly if there is suspicion of underlying dysfunction of the sinus node, such as bradycardia or sick sinus syndrome, or if there is partial AV block |
| aspirin + furosemide                  | 6 | Aspirin increases and furosemide decreases serum potassium. Effect of interaction is not clear, use caution. Use Caution/Monitor                                                                                                                                                                                                                                                                                                                                                                                                                                                                                                          |
| bisoprolol + hydrochlorothiazide      | 6 | Bisoprolol increases and hydrochlorothiazide decreases serum potassium.                                                                                                                                                                                                                                                                                                                                                                                                                                                                                                                                                                   |

|                              |   |                                                                                                                                                                                                                                                                                                                                                      |
|------------------------------|---|------------------------------------------------------------------------------------------------------------------------------------------------------------------------------------------------------------------------------------------------------------------------------------------------------------------------------------------------------|
|                              |   | Effect of interaction is not clear, use caution. Use Caution/Monitor                                                                                                                                                                                                                                                                                 |
| carvedilol + losartan        | 6 | Carvedilol, losartan. Mechanism: pharmacodynamic synergism. Use Caution/Monitor. Risk of fetal compromise if given during pregnancy                                                                                                                                                                                                                  |
| digoxin + losartan           | 6 | Losartan and digoxin both increase serum potassium. Use Caution/Monitor                                                                                                                                                                                                                                                                              |
| indapamide + meloxicam       | 6 | Indapamide will increase the level or effect of meloxicam by acidic (anionic) drug competition for renal tubular clearance. Minor/ Significance Unknown                                                                                                                                                                                              |
| indapamide + potassium       | 6 | Potassium chloride increases and indapamide decreases serum potassium. Effect of interaction is not clear, use caution. Modify Therapy/ Monitor Closely                                                                                                                                                                                              |
| indapamide + spironolactone  | 6 | Spironolactone increases and indapamide decreases serum potassium. Effect of interaction is not clear, use caution. Modify Therapy/Monitor Closely                                                                                                                                                                                                   |
| insulin + losartan           | 6 | Losartan increases effects of insulin regular human by unspecified interaction mechanism. Use Caution/ Monitor. Concomitant use of insulin and ARBs may require insulin dosage adjustment and increased glucose monitoring                                                                                                                           |
| omeprazole + warfarin        | 6 | Omeprazole will increase the level or effect of warfarin by Other (see comment). Use Caution/Monitor. Warfarin's less potent R-enantiomer is metabolized in part by CYP3A4 (and also CYP1A2 and CYP2C19). Monitor INR more frequently if co-administered with inhibitors of these isoenzymes and adjust warfarin dose if needed                      |
| perindopril + spironolactone | 6 | Perindopril, spironolactone. Mechanism: pharmacodynamic synergism. Use Caution/Monitor. Risk of hyperkalemia                                                                                                                                                                                                                                         |
| potassium + valsartan        | 6 | Valsartan and potassium chloride both increase serum potassium. Use Caution/Monitor                                                                                                                                                                                                                                                                  |
| sotalol + telmisartan        | 6 | Sotalol, telmisartan. Mechanism: pharmacodynamic synergism. Use Caution/Monitor. Risk of fetal compromise if given during pregnancy                                                                                                                                                                                                                  |
| amiodarone + pentoxifylline  | 5 | Amiodarone will increase the level or effect of pentoxifylline by affecting hepatic enzyme CYP1A2 metabolism. Use Caution/ Monitor                                                                                                                                                                                                                   |
| amlodipine + magnesium       | 5 | Magnesium supplement, amlodipine. Either increases toxicity of the other by pharmacodynamic synergism. Use Caution/Monitor. Calcium channel blockers may increase toxic effects of magnesium; magnesium may increase hypotensive effects of calcium channel blockers                                                                                 |
| aspirin + warfarin           | 5 | Aspirin increases effects of warfarin by anticoagulation. Modify Therapy/Monitor Closely. Avoid co-administration of chronic high-dose aspirin. Aspirin's antiplatelet properties may increase anticoagulation effect of warfarin. The need for simultaneous use of low-dose aspirin and warfarin is common for patients with cardiovascular disease |
| atorvastatin + telmisartan   | 5 | Telmisartan increases toxicity of atorvastatin by Other (see comment). Use Caution/Monitor. Comment: OATP1B1 inhibitors may increase risk of myopathy                                                                                                                                                                                                |
| bisoprolol + furosemide      | 5 | Bisoprolol increases and furosemide decreases serum potassium. Effect of interaction is not clear, use caution. Use Caution/Monitor                                                                                                                                                                                                                  |
| carvedilol + felodipine      | 5 | Carvedilol and felodipine both increase anti-hypertensive channel blocking. Modify Therapy/ Monitor Closely                                                                                                                                                                                                                                          |

|                                  |   |                                                                                                                                                                                                                                                                                                                                                                                 |
|----------------------------------|---|---------------------------------------------------------------------------------------------------------------------------------------------------------------------------------------------------------------------------------------------------------------------------------------------------------------------------------------------------------------------------------|
| fosinopril + spironolactone      | 5 | Fosinopril, spironolactone. Mechanism: pharmacodynamic synergism. Use Caution/Monitor. Risk of hyperkalemia                                                                                                                                                                                                                                                                     |
| hydrochlorothiazide + olmesartan | 5 | Olmesartan increases and hydrochlorothiazide decreases serum potassium. Effect of interaction is not clear, use caution. Use Caution/ Monitor                                                                                                                                                                                                                                   |
| losartan + warfarin              | 5 | Losartan will increase the level or effect of warfarin by affecting hepatic enzyme CYP2C9/10 metabolism. Use Caution/Monitor                                                                                                                                                                                                                                                    |
| perindopril + potassium          | 5 | Perindopril increases levels of potassium chloride by decreasing elimination. Use Caution/ Monitor. Risk of hyperkalemia                                                                                                                                                                                                                                                        |
| aspirin + digoxin                | 4 | Aspirin and digoxin both increase serum potassium. Use Caution/Monitor                                                                                                                                                                                                                                                                                                          |
| aspirin + ibuprofen              | 4 | Aspirin and ibuprofen both increase anticoagulation. Use Caution/Monitor. aspirin and ibuprofen both increase serum potassium. Use Caution/Monitor.                                                                                                                                                                                                                             |
| aspirin + meloxicam              | 4 | Aspirin and meloxicam both increase anticoagulation. Use Caution/Monitor                                                                                                                                                                                                                                                                                                        |
| aspirin + timolol                | 4 | Aspirin decreases effects of timolol by pharmacodynamic antagonism. Use Caution/ Monitor. Long term (>1 wk) NSAID use. NSAIDs decrease prostaglandin synthesis                                                                                                                                                                                                                  |
| atorvastatin + budesonide        | 4 | Atorvastatin will increase the level or effect of budesonide by P-glycoprotein (MDR1) efflux transporter. Use Caution/Monitor                                                                                                                                                                                                                                                   |
| atorvastatin + digoxin           | 4 | Atorvastatin will increase the level or effect of digoxin by P-glycoprotein (MDR1) efflux transporter. Use Caution/Monitor                                                                                                                                                                                                                                                      |
| atorvastatin + verapamil         | 4 | Verapamil will increase the level or effect of atorvastatin by affecting hepatic/intestinal enzyme CYP3A4 metabolism. Use Caution/ Monitor. verapamil will increase the level or effect of atorvastatin by P-glycoprotein (MDR1) efflux transporter. Use Caution/ Monitor                                                                                                       |
| captopril + chlorthalidone       | 4 | Captopril, chlorthalidone. Either increases toxicity of the other by pharmacodynamic synergism. Use Caution/Monitor. Both drugs lower blood pressure. Increased risk of nephrotoxicity. Monitor blood pressure and renal function                                                                                                                                               |
| digoxin + metformin              | 4 | Digoxin, metformin. Either increases levels of the other by basic (cationic) drug competition for renal tubular clearance. Use Caution/Monitor. Measure serum digoxin concentrations before initiating metformin. Monitor patients who take both metformin and digoxin for possible digoxin toxicity and lactic acidosis. Reduce the digoxin and/or metformin dose as necessary |
| digoxin + metoprolol             | 4 | Digoxin increases toxicity of metoprolol by unspecified interaction mechanism. Avoid or Use Alternate Drug. Can increase risk of bradycardia                                                                                                                                                                                                                                    |
| ferrous sulfate + omeprazole     | 4 | Omeprazole will decrease the level or effect of ferrous sulfate by increasing gastric pH. Applies only to oral form of both agents. Use Caution/Monitor                                                                                                                                                                                                                         |
| formoterol + torsemide           | 4 | Formoterol and torsemide both decrease serum potassium. Use Caution/Monitor                                                                                                                                                                                                                                                                                                     |
| furosemide + losartan            | 4 | Losartan increases and furosemide decreases serum potassium. Effect of interaction is not clear, use caution. Use Caution/Monitor                                                                                                                                                                                                                                               |
| ibuprofen + meloxicam            | 4 | Ibuprofen and meloxicam both increase serum potassium. Use Caution/Monitor. ibuprofen and meloxicam both increase anticoagulation. Use                                                                                                                                                                                                                                          |

|                              |   | Caution/Monitor                                                                                                                                                                                                                                                                                                                                                                                                                                                                                                                                                                                                                                                                                                                                  |
|------------------------------|---|--------------------------------------------------------------------------------------------------------------------------------------------------------------------------------------------------------------------------------------------------------------------------------------------------------------------------------------------------------------------------------------------------------------------------------------------------------------------------------------------------------------------------------------------------------------------------------------------------------------------------------------------------------------------------------------------------------------------------------------------------|
| ketoprofen + meloxicam       | 4 | Ketoprofen and meloxicam both increase anticoagulation. Use Caution/Monitor. ketoprofen and meloxicam both increase serum potassium. Use Caution/Monitor                                                                                                                                                                                                                                                                                                                                                                                                                                                                                                                                                                                         |
| losartan + sotalol           | 4 | Losartan and sotalol both increase serum potassium. Use Caution/Monitor                                                                                                                                                                                                                                                                                                                                                                                                                                                                                                                                                                                                                                                                          |
| metoprolol + valsartan       | 4 | Metoprolol, valsartan. Mechanism: pharmacodynamic synergism. Use Caution/Monitor. Risk of fetal compromise if given during pregnancy                                                                                                                                                                                                                                                                                                                                                                                                                                                                                                                                                                                                             |
| nebivolol + spironolactone   | 4 | Nebivolol and spironolactone both increase serum potassium. Modify Therapy/Monitor Closely                                                                                                                                                                                                                                                                                                                                                                                                                                                                                                                                                                                                                                                       |
| sotalol + valsartan          | 4 | Sotalol, valsartan. Mechanism: pharmacodynamic synergism. Use Caution/Monitor. Risk of fetal compromise if given during pregnancy                                                                                                                                                                                                                                                                                                                                                                                                                                                                                                                                                                                                                |
| spironolactone + telmisartan | 4 | Telmisartan and spironolactone both increase serum potassium. Modify Therapy/Monitor Closely                                                                                                                                                                                                                                                                                                                                                                                                                                                                                                                                                                                                                                                     |
| telmisartan + torsemide      | 4 | Telmisartan increases and torsemide decreases serum potassium. Effect of interaction is not clear, use caution. Use Caution/Monitor                                                                                                                                                                                                                                                                                                                                                                                                                                                                                                                                                                                                              |
| apixaban + aspirin           | 3 | Aspirin and apixaban both increase anticoagulation. Modify Therapy/Monitor Closely. Both drugs have the potential to cause bleeding. The need for simultaneous use of low-dose aspirin (<100 mg/day) with anticoagulants are common for patients with cardiovascular disease, but may result in increased bleeding; monitor closely. Promptly evaluate any signs or symptoms of blood loss if treated concomitantly with low-dose aspirin. Avoid co-administration with chronic use of higher dose aspirin. In 1 trial (APPRAISE-2), therapy was terminated because of significantly increased bleeding when apixaban was administered with dual antiplatelet therapy (eg, aspirin plus clopidogrel) compared with single antiplatelet treatment |
| aspirin + chlorthalidone     | 3 | Aspirin increases and chlorthalidone decreases serum potassium. Effect of interaction is not clear, use caution. Use Caution/Monitor                                                                                                                                                                                                                                                                                                                                                                                                                                                                                                                                                                                                             |
| aspirin + formoterol         | 3 | Aspirin increases and formoterol decreases serum potassium. Effect of interaction is not clear, use caution. Use Caution/Monitor                                                                                                                                                                                                                                                                                                                                                                                                                                                                                                                                                                                                                 |
| bisoprolol + chlorthalidone  | 3 | Bisoprolol increases and chlorthalidone decreases serum potassium. Effect of interaction is not clear, use caution. Use Caution/Monitor                                                                                                                                                                                                                                                                                                                                                                                                                                                                                                                                                                                                          |
| candesartan + meloxicam      | 3 | Candesartan, meloxicam. Either increases toxicity of the other by Other (see comment). Use Caution/ Monitor. Comment: May result in renal function deterioration, particularly in elderly or volume depleted individuals                                                                                                                                                                                                                                                                                                                                                                                                                                                                                                                         |
| captopril + furosemide       | 3 | Captopril, furosemide. Mechanism: pharmacodynamic synergism. Use Caution/Monitor. Risk of acute hypotension, renal insufficiency                                                                                                                                                                                                                                                                                                                                                                                                                                                                                                                                                                                                                 |
| carvedilol + torsemide       | 3 | Carvedilol increases and torsemide decreases serum potassium. Effect of interaction is not clear, use caution. Use Caution/Monitor                                                                                                                                                                                                                                                                                                                                                                                                                                                                                                                                                                                                               |
| dexamethasone + levofloxacin | 3 | Dexamethasone and levofloxacin both increase Other (see comment). Use Caution/Monitor. Co-administration of quinolone antibiotics and corticosteroids may increase risk of tendon rupture                                                                                                                                                                                                                                                                                                                                                                                                                                                                                                                                                        |
| diclofenac + losartan        | 3 | Diclofenac decreases effects of losartan by pharmacodynamic antagonism.                                                                                                                                                                                                                                                                                                                                                                                                                                                                                                                                                                                                                                                                          |

|                               |   |                                                                                                                                                                                                                                                                                                                                                                                                                                                                                                                                 |
|-------------------------------|---|---------------------------------------------------------------------------------------------------------------------------------------------------------------------------------------------------------------------------------------------------------------------------------------------------------------------------------------------------------------------------------------------------------------------------------------------------------------------------------------------------------------------------------|
|                               |   | Modify Therapy/ Monitor Closely. NSAIDs decrease synthesis of vasodilating renal prostaglandins, and thus affect fluid homeostasis and may diminish antihypertensive effect                                                                                                                                                                                                                                                                                                                                                     |
| formoterol + salmeterol       | 3 | Formoterol and salmeterol both decrease serum potassium. Use Caution/Monitor                                                                                                                                                                                                                                                                                                                                                                                                                                                    |
| formoterol + spironolactone   | 3 | Spironolactone increases and formoterol decreases serum potassium. Effect of interaction is not clear, use caution. Modify Therapy/Monitor Closely                                                                                                                                                                                                                                                                                                                                                                              |
| hydrochlorothiazide + sotalol | 3 | Sotalol increases and hydrochlorothiazide decreases serum potassium. Effect of interaction is not clear, use caution. Use Caution/Monitor                                                                                                                                                                                                                                                                                                                                                                                       |
| ibuprofen + losartan          | 3 | Ibuprofen decreases effects of losartan by pharmacodynamic antagonism. Modify Therapy/ Monitor Closely. NSAIDs decrease synthesis of vasodilating renal prostaglandins, and thus affect fluid homeostasis and may diminish antihypertensive effect                                                                                                                                                                                                                                                                              |
| indomethacin + losartan       | 3 | Indomethacin decreases effects of losartan by pharmacodynamic antagonism. Modify Therapy/Monitor Closely. NSAIDs decrease synthesis of vasodilating renal prostaglandins, and thus affect fluid homeostasis and may diminish antihypertensive effect                                                                                                                                                                                                                                                                            |
| insulin + metformin           | 3 | Metformin, insulin aspart. Either increases effects of the other by pharmacodynamic synergism. Use Caution/Monitor. Antidiabetic agents are often used in combination; dosage adjustments may be required when initiating or discontinuing antidiabetic agents. metformin, insulin detemir. Either increases effects of the other by pharmacodynamic synergism. Use Caution/Monitor. Antidiabetic agents are often used in combination; dosage adjustments may be required when initiating or discontinuing antidiabetic agents |
| ipratropium + tiotropium      | 3 | Ipratropium and tiotropium both decrease cholinergic effects/transmission. Use Caution/Monitor. Due to the poor systemic absorption of ipratropium, interaction unlikely at regularly recommended dosages                                                                                                                                                                                                                                                                                                                       |
| levothyroxine + metformin     | 3 | Levothyroxine decreases effects of metformin by pharmacodynamic antagonism. Use Caution/Monitor. Patient should be closely observed for loss of blood glucose control; when drugs are withdrawn from a patient receiving metformin, patient should be observed closely for hypoglycemia                                                                                                                                                                                                                                         |
| meloxicam + spironolactone    | 3 | Spironolactone and meloxicam both increase serum potassium. Modify Therapy/Monitor Closely                                                                                                                                                                                                                                                                                                                                                                                                                                      |
| metoprolol + nifedipine       | 3 | Metoprolol and nifedipine both increase anti-hypertensive channel blocking. Modify Therapy/Monitor Closely                                                                                                                                                                                                                                                                                                                                                                                                                      |
| nebivolol + torsemide         | 3 | Nebivolol increases and torsemide decreases serum potassium. Effect of interaction is not clear, use caution. Use Caution/Monitor                                                                                                                                                                                                                                                                                                                                                                                               |
| nifedipine + nitroglycerin    | 3 | Nifedipine, nitroglycerin sublingual. Either increases toxicity of the other by additive vasodilation. Modify Therapy/ Monitor Closely. Marked orthostatic hypotension reported with concomitant use                                                                                                                                                                                                                                                                                                                            |
| aceclofenac + aspirin         | 2 | Aceclofenac and aspirin both increase anticoagulation. Use Caution/Monitor. aceclofenac and aspirin both increase serum potassium. Use Caution/Monitor                                                                                                                                                                                                                                                                                                                                                                          |
| aceclofenac + bisoprolol      | 2 | Aceclofenac decreases effects of bisoprolol by pharmacodynamic antagonism.                                                                                                                                                                                                                                                                                                                                                                                                                                                      |

|                                  |   |                                                                                                                                                                                                                                                                                                                                                                                                                                                                             |
|----------------------------------|---|-----------------------------------------------------------------------------------------------------------------------------------------------------------------------------------------------------------------------------------------------------------------------------------------------------------------------------------------------------------------------------------------------------------------------------------------------------------------------------|
|                                  |   | Use Caution/Monitor. Long term (>1 wk) NSAID use. NSAIDs decrease prostaglandin synthesis                                                                                                                                                                                                                                                                                                                                                                                   |
| amiodarone + budesonide          | 2 | Amiodarone will increase the level or effect of budesonide by P-glycoprotein (MDR1) efflux transporter. Use Caution/Monitor                                                                                                                                                                                                                                                                                                                                                 |
| amiodarone + dabigatran          | 2 | Amiodarone will increase the level or effect of dabigatran by P-glycoprotein (MDR1) efflux transporter. Use Caution/ Monitor. Atrial fibrillation: Avoid co-administering dabigatran with P-gp inhibitors if CrCl <30 mL/ min. DVT/ PE treatment: Avoid co-administering dabigatran with P-gp inhibitors if CrCl <50 mL/ min                                                                                                                                                |
| amiodarone + hydrochlorothiazide | 2 | Amiodarone will increase the level or effect of hydrochlorothiazide by basic (cationic) drug competition for renal tubular clearance. Use Caution/Monitor                                                                                                                                                                                                                                                                                                                   |
| amiodarone + metformin           | 2 | Amiodarone will increase the level or effect of metformin by basic (cationic) drug competition for renal tubular clearance. Use Caution/Monitor                                                                                                                                                                                                                                                                                                                             |
| amlodipine + nifedipine          | 2 | Amlodipine and nifedipine both increase anti-hypertensive channel blocking. Use Caution/Monitor                                                                                                                                                                                                                                                                                                                                                                             |
| aspirin + doxazosin              | 2 | Aspirin decreases effects of doxazosin by pharmacodynamic antagonism. Use Caution/Monitor. NSAIDs decrease prostaglandin synthesis                                                                                                                                                                                                                                                                                                                                          |
| aspirin + enoxaparin             | 2 | Aspirin, enoxaparin. Either increases toxicity of the other by pharmacodynamic synergism. Use Caution/Monitor. The need for simultaneous use of low-dose aspirin and anticoagulant or antiplatelet agents are common for patients with cardiovascular disease; monitor closely                                                                                                                                                                                              |
| aspirin + heparin                | 2 | Aspirin, heparin. Either increases toxicity of the other by anticoagulation. Use Caution/Monitor. The need for simultaneous use of low-dose aspirin and anticoagulant or antiplatelet agents are common for patients with cardiovascular disease; monitor closely                                                                                                                                                                                                           |
| aspirin + ketoprofen             | 2 | Aspirin and ketoprofen both increase anticoagulation. Use Caution/Monitor. aspirin and ketoprofen both increase serum potassium. Use Caution/Monitor. aspirin will increase the level or effect of ketoprofen by acidic (anionic) drug competition for renal tubular clearance. Minor/Significance Unknown                                                                                                                                                                  |
| aspirin + ramipril               | 2 | Aspirin, ramipril. pharmacodynamic antagonism. Avoid or Use Alternate Drug. Co-administration may result in a significant decrease in renal function. NSAIDs may diminish the antihypertensive effect of ACE inhibitors. The mechanism of these interactions is likely related to the ability of NSAIDs to reduce the synthesis of vasodilating renal prostaglandins                                                                                                        |
| azilsartan + meloxicam           | 2 | Meloxicam, azilsartan. Either increases toxicity of the other by Other (see comment). Use Caution/Monitor. Comment: May result in renal function deterioration, particularly in elderly or volume depleted individuals. meloxicam decreases effects of azilsartan by pharmacodynamic antagonism. Modify Therapy/Monitor Closely. NSAIDs decrease synthesis of vasodilating renal prostaglandins, and thus affect fluid homeostasis and may diminish antihypertensive effect |
| bisoprolol + calcium carbonate   | 2 | Calcium carbonate decreases levels of bisoprolol by inhibition of GI absorption. Applies only to oral form of both agents. Use Caution/Monitor. Separate by 2 hours                                                                                                                                                                                                                                                                                                         |

|                                 |   |                                                                                                                                                                                                                                                                                                                                                                                                                                                                               |
|---------------------------------|---|-------------------------------------------------------------------------------------------------------------------------------------------------------------------------------------------------------------------------------------------------------------------------------------------------------------------------------------------------------------------------------------------------------------------------------------------------------------------------------|
| bisoprolol + ketoprofen         | 2 | Bisoprolol and ketoprofen both increase serum potassium. Use Caution/Monitor                                                                                                                                                                                                                                                                                                                                                                                                  |
| bisoprolol + lornoxicam         | 2 | Bisoprolol and lornoxicam both increase serum potassium. Use Caution/Monitor                                                                                                                                                                                                                                                                                                                                                                                                  |
| bisoprolol + meloxicam          | 2 | Bisoprolol and meloxicam both increase serum potassium. Use Caution/Monitor                                                                                                                                                                                                                                                                                                                                                                                                   |
| bisoprolol + nebivolol          | 2 | Bisoprolol and nebivolol both increase anti-hypertensive channel blocking. Avoid or Use Alternate Drug                                                                                                                                                                                                                                                                                                                                                                        |
| bisoprolol + timolol            | 2 | Bisoprolol and timolol both increase anti-hypertensive channel blocking. Avoid or Use Alternate Drug                                                                                                                                                                                                                                                                                                                                                                          |
| budesonide + omeprazole         | 2 | Omeprazole decreases effects of budesonide by increasing gastric pH. Applies only to oral form of both agents. Modify Therapy/Monitor Closely. Enteric-coated budesonide dissolves at pH >5.5. Also, dissolution of extended-release budesonide tablets is pH dependent. Co-administration with drugs that increase gastric pH may cause these budesonide products to prematurely dissolve, and possibly affect release properties and absorption of the drug in the duodenum |
| calcium carbonate + carvedilol  | 2 | Calcium carbonate decreases levels of carvedilol by inhibition of GI absorption. Applies only to oral form of both agents. Use Caution/ Monitor. Separate by 2 hours                                                                                                                                                                                                                                                                                                          |
| calcium carbonate + metoprolol  | 2 | Calcium carbonate decreases effects of metoprolol by unspecified interaction mechanism. Use Caution/Monitor                                                                                                                                                                                                                                                                                                                                                                   |
| candesartan + eplerenone        | 2 | Candesartan, eplerenone. Mechanism: pharmacodynamic synergism. Use Caution/Monitor. Risk of hyperkalemia                                                                                                                                                                                                                                                                                                                                                                      |
| captopril + digoxin             | 2 | Candesartan, eplerenone. Mechanism: pharmacodynamic synergism. Use Caution/ Monitor. Risk of hyperkalemia                                                                                                                                                                                                                                                                                                                                                                     |
| captopril + eplerenone          | 2 | Captopril, eplerenone. Either increases toxicity of the other by Mechanism: pharmacodynamic synergism. Use Caution/Monitor. Risk of hyperkalemia. Monitor potassium                                                                                                                                                                                                                                                                                                           |
| captopril + hydrochlorothiazide | 2 | Captopril, hydrochlorothiazide. Either increases effects of the other by pharmacodynamic synergism. Use Caution/ Monitor. Both drugs lower blood pressure. Increased risk of nephrotoxicity. Monitor blood pressure and renal function                                                                                                                                                                                                                                        |
| carvedilol + nifedipine         | 2 | Carvedilol and nifedipine both increase anti-hypertensive channel blocking. Modify Therapy/Monitor Closely                                                                                                                                                                                                                                                                                                                                                                    |
| celecoxib + meloxicam           | 2 | Celecoxib and meloxicam both increase anticoagulation. Use Caution/Monitor. celecoxib and meloxicam both increase serum potassium. Use Caution/Monitor                                                                                                                                                                                                                                                                                                                        |
| ciprofloxacin + dexamethasone   | 2 | Dexamethasone and ciprofloxacin both increase Other (see comment). Use Caution/Monitor. Co-administration of quinolone antibiotics and corticosteroids may increase risk of tendon rupture                                                                                                                                                                                                                                                                                    |
| clopidogrel + dabigatran        | 2 | Dabigatran, clopidogrel. Either increases effects of the other by pharmacody-                                                                                                                                                                                                                                                                                                                                                                                                 |

|                                |   |                                                                                                                                                                                                                                                                                                                                                                                                                                 |
|--------------------------------|---|---------------------------------------------------------------------------------------------------------------------------------------------------------------------------------------------------------------------------------------------------------------------------------------------------------------------------------------------------------------------------------------------------------------------------------|
|                                |   | namic synergism. Use Caution/ Monitor. Both drugs have the potential to cause bleeding. Concomitant use may increase risk of bleeding                                                                                                                                                                                                                                                                                           |
| diclofenac + flurbiprofen      | 2 | Diclofenac and flurbiprofen both increase anticoagulation. Use Caution/Monitor. diclofenac and flurbiprofen both increase serum potassium. Use Caution/Monitor                                                                                                                                                                                                                                                                  |
| diclofenac + lornoxicam        | 2 | Diclofenac and lornoxicam both increase anticoagulation. Use Caution/Monitor. diclofenac and lornoxicam both increase serum potassium. Use Caution/Monitor                                                                                                                                                                                                                                                                      |
| diclofenac + meloxicam         | 2 | Diclofenac and meloxicam both increase serum potassium. Use Caution/Monitor                                                                                                                                                                                                                                                                                                                                                     |
| diclofenac + spironolactone    | 2 | Spironolactone and diclofenac both increase serum potassium. Modify Therapy/Monitor Closely                                                                                                                                                                                                                                                                                                                                     |
| diclofenac + torsemide         | 2 | Diclofenac increases and torsemide decreases serum potassium. Effect of interaction is not clear, use caution. Use Caution/Monitor                                                                                                                                                                                                                                                                                              |
| digoxin + pantoprazole         | 2 | Pantoprazole will increase the level or effect of digoxin by increasing gastric pH. Applies only to oral form of both agents. Avoid or Use Alternate Drug                                                                                                                                                                                                                                                                       |
| enalapril + metformin          | 2 | Enalapril increases toxicity of metformin by unspecified interaction mechanism. Use Caution/Monitor. Increases risk for hypoglycemia and lactic acidosis                                                                                                                                                                                                                                                                        |
| eplerenone + losartan          | 2 | Losartan, eplerenone. Mechanism: pharmacodynamic synergism. Use Caution/Monitor. Risk of hyperkalemia                                                                                                                                                                                                                                                                                                                           |
| felodipine + nitroglycerin     | 2 | Felodipine, nitroglycerin sublingual. Either increases toxicity of the other by additive vasodilation. Modify Therapy/Monitor Closely. Marked orthostatic hypotension reported with concomitant use                                                                                                                                                                                                                             |
| ferrous sulfate + pantoprazole | 2 | Pantoprazole will decrease the level or effect of ferrous sulfate by increasing gastric pH. Applies only to oral form of both agents. Use Caution/Monitor                                                                                                                                                                                                                                                                       |
| indapamide + nebivolol         | 2 | Nebivolol increases and indapamide decreases serum potassium. Effect of interaction is not clear, use caution. Use Caution/Monitor                                                                                                                                                                                                                                                                                              |
| indapamide + sotalol           | 2 | Indapamide and sotalol both increase QTc interval. Contraindicated                                                                                                                                                                                                                                                                                                                                                              |
| indapamide + timolol           | 2 | Timolol increases and indapamide decreases serum potassium. Effect of interaction is not clear, use caution. Use Caution/Monitor                                                                                                                                                                                                                                                                                                |
| meloxicam + naproxen           | 2 | Meloxicam and naproxen both increase serum potassium. Use Caution/Monitor. meloxicam and naproxen both increase anticoagulation. Use Caution/Monitor                                                                                                                                                                                                                                                                            |
| metformin + nifedipine         | 2 | Nifedipine decreases effects of metformin by pharmacodynamic antagonism. Use Caution/Monitor. Patient should be closely observed for loss of blood glucose control; when drugs are withdrawn from a patient receiving metformin, patient should be observed closely for hypoglycemia. nifedipine increases levels of metformin by enhancing GI absorption. Applies only to oral form of both agents. Minor/Significance Unknown |
| metoprolol + ranolazine        | 2 | Ranolazine will increase the level or effect of metoprolol by affecting hepatic enzyme CYP2D6 metabolism. Use Caution/Monitor                                                                                                                                                                                                                                                                                                   |



|                                 |   |                                                                                                                                                                                                                                                                                                                                                                                                                             |
|---------------------------------|---|-----------------------------------------------------------------------------------------------------------------------------------------------------------------------------------------------------------------------------------------------------------------------------------------------------------------------------------------------------------------------------------------------------------------------------|
| metoprolol + telmisartan        | 2 | Metoprolol, telmisartan. Mechanism: pharmacodynamic synergism. Use Caution/Monitor. Risk of fetal compromise if given during pregnancy                                                                                                                                                                                                                                                                                      |
| nebivolol + potassium           | 2 | Nebivolol and potassium chloride both increase serum potassium. Modify Therapy/Monitor Closely                                                                                                                                                                                                                                                                                                                              |
| phenylephrine + xylometazoline  | 2 | Phenylephrine and xylometazoline both decrease sedation. Use Caution/Monitor. phenylephrine and xylometazoline both increase sympathetic (adrenergic) effects, including increased blood pressure and heart rate. Use Caution/Monitor                                                                                                                                                                                       |
| potassium + sotalol             | 2 | Sotalol and potassium chloride both increase serum potassium. Modify Therapy/Monitor Closely                                                                                                                                                                                                                                                                                                                                |
| spironolactone + valsartan      | 2 | Valsartan and spironolactone both increase serum potassium. Modify Therapy/Monitor Closely                                                                                                                                                                                                                                                                                                                                  |
| torsemide + valsartan           | 2 | Valsartan increases and torsemide decreases serum potassium. Effect of interaction is not clear, use caution. Use Caution/Monitor                                                                                                                                                                                                                                                                                           |
| diclofenac + indapamide         | 2 | Diclofenac increases and indapamide decreases serum potassium. Effect of interaction is not clear, use caution. Use Caution/Monitor                                                                                                                                                                                                                                                                                         |
| aceclofenac + indapamide        | 1 | Aceclofenac increases and indapamide decreases serum potassium. Effect of interaction is not clear, use caution. Use Caution/Monitor                                                                                                                                                                                                                                                                                        |
| acetaminophen + warfarin        | 1 | Acetaminophen increases effects of warfarin by anticoagulation. Use Caution/Monitor                                                                                                                                                                                                                                                                                                                                         |
| allopurinol + calcium carbonate | 1 | Calcium carbonate decreases levels of allopurinol by inhibition of GI absorption. Applies only to oral form of both agents. Use Caution/Monitor. Separate by 2 hours                                                                                                                                                                                                                                                        |
| amiodarone + atenolol           | 1 | Amiodarone, atenolol. Mechanism: pharmacodynamic synergism. Use Caution/Monitor. Risk of cardiotoxicity with bradycardia                                                                                                                                                                                                                                                                                                    |
| amiodarone + ciprofloxacin      | 1 | Ciprofloxacin and amiodarone both increase QTc interval. Use Caution/Monitor. Ciprofloxacin elicits minimal effects on QT interval. Caution if used in combination with other drugs known to affect QT interval or in patients with other risk factors                                                                                                                                                                      |
| amlodipine + carbamazepine      | 1 | Carbamazepine will decrease the level or effect of amlodipine by affecting hepatic/intestinal enzyme CYP3A4 metabolism. Modify Therapy/Monitor Closely                                                                                                                                                                                                                                                                      |
| atenolol + spironolactone       | 1 | Atenolol and spironolactone both increase serum potassium. Modify Therapy/Monitor Closely                                                                                                                                                                                                                                                                                                                                   |
| atorvastatin + carbamazepine    | 1 | Carbamazepine will decrease the level or effect of atorvastatin by affecting hepatic/intestinal enzyme CYP3A4 metabolism. Avoid or Use Alternate Drug                                                                                                                                                                                                                                                                       |
| bisoprolol + ivabradine         | 1 | Ivabradine, bisoprolol. Either increases effects of the other by pharmacodynamic synergism. Modify Therapy/Monitor Closely. Most patients receiving ivabradine will also be treated with a beta-blocker. The risk of bradycardia increases with co-administration of drugs that slow heart rate (eg, digoxin, amiodarone, beta-blockers). Monitor heart rate in patients taking ivabradine with other negative chronotropes |

|                                   |   |                                                                                                                                                                                                                                                                                                           |
|-----------------------------------|---|-----------------------------------------------------------------------------------------------------------------------------------------------------------------------------------------------------------------------------------------------------------------------------------------------------------|
| bisoprolol + theophylline         | 1 | Bisoprolol, theophylline. Other (see comment). Use Caution/Monitor. Comment: Beta blockers (esp. non selective) antagonize theophylline effects, while at the same time increasing theophylline levels and toxicity (mechanism: decreased theophylline metabolism). Smoking increases risk of interaction |
| budesonide + clarithromycin       | 1 | Budesonide will decrease the level or effect of clarithromycin by affecting hepatic/intestinal enzyme CYP3A4 metabolism. Minor/Significance Unknown                                                                                                                                                       |
| budesonide + theophylline         | 1 | Budesonide will decrease the level or effect of theophylline by affecting hepatic/intestinal enzyme CYP3A4 metabolism. Use Caution/Monitor                                                                                                                                                                |
| caffeine + phenylephrine          | 1 | Caffeine and phenylephrine both decrease sedation. Use Caution/Monitor                                                                                                                                                                                                                                    |
| calcium carbonate + celecoxib     | 1 | Calcium carbonate decreases levels of celecoxib by inhibition of GI absorption. Applies only to oral form of both agents. Use Caution/Monitor. Separate by 2 hours                                                                                                                                        |
| calcium carbonate + fosinopril    | 1 | Calcium carbonate decreases effects of fosinopril by unspecified interaction mechanism. Use Caution/Monitor                                                                                                                                                                                               |
| calcium carbonate + levothyroxine | 1 | Calcium carbonate decreases levels of levothyroxine by inhibition of GI absorption. Applies only to oral form of both agents. Use Caution/Monitor. Separate by 2 hours                                                                                                                                    |
| calcium carbonate + nifedipine    | 1 | Calcium carbonate decreases effects of nifedipine by pharmacodynamic antagonism. Use Caution/Monitor                                                                                                                                                                                                      |
| calcium carbonate + ramipril      | 1 | Calcium carbonate decreases effects of ramipril by unspecified interaction mechanism. Use Caution/Monitor                                                                                                                                                                                                 |
| calcium carbonate + rosuvastatin  | 1 | Calcium carbonate decreases levels of rosuvastatin by inhibition of GI absorption. Applies only to oral form of both agents. Use Caution/Monitor. Separate by 2 hours                                                                                                                                     |
| calcium carbonate + vitamin D     | 1 | Vitamin D, calcium carbonate. Other (see comment). Use Caution/Monitor. Comment: The concurrent use of vitamin D with calcium salts is generally beneficial; in some patients this combination may result in hypercalcemia                                                                                |
| candesartan + chlorthalidone      | 1 | Candesartan increases and chlorthalidone decreases serum potassium. Effect of interaction is not clear, use caution. Use Caution/Monitor                                                                                                                                                                  |
| candesartan + hydrochlorothiazide | 1 | Candesartan increases and hydrochlorothiazide decreases serum potassium. Effect of interaction is not clear, use caution. Use Caution/Monitor                                                                                                                                                             |
| candesartan + indapamide          | 1 | Candesartan increases and indapamide decreases serum potassium. Effect of interaction is not clear, use caution. Use Caution/Monitor                                                                                                                                                                      |
| candesartan + potassium           | 1 | Candesartan and potassium chloride both increase serum potassium. Use Caution/Monitor                                                                                                                                                                                                                     |
| captopril + calcium carbonate     | 1 | Calcium carbonate decreases effects of captopril by unspecified interaction mechanism. Use Caution/Monitor. Calcium carbonate may decrease absorption of captopril                                                                                                                                        |
| captopril + ciprofloxacin         | 1 | Captopril increases toxicity of ciprofloxacin by Mechanism: unspecified interaction mechanism. Use Caution/Monitor. ACE Inhibitors increase arrhythmogenic potential of ciprofloxacin. Monitor ECG and QT interval                                                                                        |

|                                  |   |                                                                                                                                                                                                                                                                                                                                                                          |
|----------------------------------|---|--------------------------------------------------------------------------------------------------------------------------------------------------------------------------------------------------------------------------------------------------------------------------------------------------------------------------------------------------------------------------|
| captopril + ibuprofen            | 1 | Captopril, ibuprofen. Either increases toxicity of the other by Other (see comment). Use Caution/Monitor. Comment: May result in renal function deterioration, particularly in elderly or volume depleted individuals                                                                                                                                                    |
| captopril + insulin              | 1 | Captopril increases effects of insulin regular human by pharmacodynamic synergism. Use Caution/Monitor. Both drugs decrease blood glucose. Monitor blood glucose                                                                                                                                                                                                         |
| captopril + ketoprofen           | 1 | Captopril, ketoprofen. Either increases toxicity of the other by Other (see comment). Use Caution/Monitor. Comment: May result in renal function deterioration, particularly in elderly or volume depleted individuals                                                                                                                                                   |
| captopril + meloxicam            | 1 | Captopril, meloxicam. Either increases toxicity of the other by Other (see comment). Use Caution/Monitor. Comment: May result in renal function deterioration, particularly in elderly or volume depleted individuals                                                                                                                                                    |
| captopril + pentoxifylline       | 1 | Pentoxifylline, captopril. Either increases effects of the other by pharmacodynamic synergism. Use Caution/Monitor. Both drugs lower blood pressure. Monitor blood pressure                                                                                                                                                                                              |
| carbamazepine + warfarin         | 1 | Carbamazepine will decrease the level or effect of warfarin by affecting hepatic enzyme CYP2C9/10 metabolism. Modify Therapy/Monitor Closely                                                                                                                                                                                                                             |
| carvedilol + hydrochlorothiazide | 1 | Carvedilol increases and hydrochlorothiazide decreases serum potassium. Effect of interaction is not clear, use caution. Use Caution/Monitor                                                                                                                                                                                                                             |
| carvedilol + indapamide          | 1 | Carvedilol increases and indapamide decreases serum potassium. Effect of interaction is not clear, use caution. Use Caution/Monitor                                                                                                                                                                                                                                      |
| carvedilol + potassium           | 1 | Carvedilol and potassium chloride both increase serum potassium. Modify Therapy/Monitor Closely                                                                                                                                                                                                                                                                          |
| celecoxib + heparin              | 1 | Heparin and celecoxib both increase anticoagulation. Modify Therapy/Monitor Closely                                                                                                                                                                                                                                                                                      |
| celecoxib + indapamide           | 1 | Celecoxib increases and indapamide decreases serum potassium. Effect of interaction is not clear, use caution. Use Caution/Monitor                                                                                                                                                                                                                                       |
| celecoxib + lisinopril           | 1 | Celecoxib, lisinopril. pharmacodynamic antagonism. Avoid or Use Alternate Drug. Co-administration may result in a significant decrease in renal function. NSAIDs may diminish the antihypertensive effect of ACE inhibitors. The mechanism of these interactions is likely related to the ability of NSAIDs to reduce the synthesis of vasodilating renal prostaglandins |
| celecoxib + rivaroxaban          | 1 | Rivaroxaban, celecoxib. Other (see comment). Use Caution/Monitor. Comment: NSAIDs are known to increase bleeding. Bleeding risk may be increased when NSAIDs are used concomitantly with rivaroxaban. Monitor for signs/symptoms of blood loss                                                                                                                           |
| chloramphenicol + tinidazole     | 1 | Chloramphenicol will increase the level or effect of tinidazole by affecting hepatic/intestinal enzyme CYP3A4 metabolism. Use Caution/Monitor                                                                                                                                                                                                                            |
| chlorpheniramine + caffeine      | 1 | Chlorpheniramine increases and caffeine decreases sedation. Effect of interaction is not clear, use caution. Use Caution/Monitor                                                                                                                                                                                                                                         |
| chlorpheniramine + phenylephrine | 1 | Chlorpheniramine increases and phenylephrine decreases sedation. Effect of interaction is not clear, use caution. Use Caution/Monitor                                                                                                                                                                                                                                    |

|                                      |   |                                                                                                                                                                                                                                                                                                                                           |
|--------------------------------------|---|-------------------------------------------------------------------------------------------------------------------------------------------------------------------------------------------------------------------------------------------------------------------------------------------------------------------------------------------|
| chlorthalidone + hydrochlorothiazide | 1 | Chlorthalidone and hydrochlorothiazide both decrease serum potassium. Use Caution/Monitor                                                                                                                                                                                                                                                 |
| chlorthalidone + meloxicam           | 1 | Chlorthalidone will increase the level or effect of meloxicam by acidic (anionic) drug competition for renal tubular clearance. Minor/Significance Unknown                                                                                                                                                                                |
| chlorthalidone + metoprolol          | 1 | Metoprolol increases and chlorthalidone decreases serum potassium. Effect of interaction is not clear, use caution. Use Caution/Monitor                                                                                                                                                                                                   |
| ciprofloxacin + ibuprofen            | 1 | Ibuprofen, ciprofloxacin. Other (see comment). Modify Therapy/Monitor Closely. Comment: Mechanism: unknown. Increased risk of CNS stimulation and seizures with high doses of fluoroquinolones                                                                                                                                            |
| ciprofloxacin + pentoxifylline       | 1 | Ciprofloxacin will increase the level or effect of pentoxifylline by affecting hepatic enzyme CYP1A2 metabolism. Use Caution/Monitor                                                                                                                                                                                                      |
| ciprofloxacin + tinidazole           | 1 | Ciprofloxacin will increase the level or effect of tinidazole by affecting hepatic/intestinal enzyme CYP3A4 metabolism. Use Caution/Monitor                                                                                                                                                                                               |
| clopidogrel + diclofenac             | 1 | Clopidogrel, diclofenac. Either increases effects of the other by pharmacodynamic synergism. Modify Therapy/Monitor Closely. Clopidogrel and NSAIDs both inhibit platelet aggregation                                                                                                                                                     |
| clopidogrel + enoxaparin             | 1 | Enoxaparin, clopidogrel. Either increases effects of the other by pharmacodynamic synergism. Modify Therapy/Monitor Closely. Enhanced risk of hemorrhage; additive effects are intended when both drugs are prescribed as indicated for ACS                                                                                               |
| clopidogrel + ibuprofen              | 1 | Clopidogrel, ibuprofen. Either increases effects of the other by pharmacodynamic synergism. Modify Therapy/Monitor Closely. Clopidogrel and NSAIDs both inhibit platelet aggregation                                                                                                                                                      |
| clopidogrel + meloxicam              | 1 | Clopidogrel, meloxicam. Either increases effects of the other by pharmacodynamic synergism. Modify Therapy/Monitor Closely. Clopidogrel and NSAIDs both inhibit platelet aggregation                                                                                                                                                      |
| clopidogrel + piracetam              | 1 | Piracetam increases effects of clopidogrel by pharmacodynamic synergism. Use Caution/Monitor                                                                                                                                                                                                                                              |
| clopidogrel + ticagrelor             | 1 | Ticagrelor, clopidogrel. Either increases effects of the other by Other (see comment). Use Caution/Monitor. Comment: Increased risk of bleeding during concomitant use of medications that increase potential for bleeding                                                                                                                |
| clopidogrel + warfarin               | 1 | Clopidogrel, warfarin. Either increases effects of the other by pharmacodynamic synergism. Modify Therapy/Monitor Closely. Drugs with antiplatelet properties may increase anticoagulation effect of warfarin                                                                                                                             |
| dabigatran + ibuprofen               | 1 | Dabigatran and ibuprofen both increase anticoagulation. Use Caution/Monitor. Caution is advised, both drugs have the potential to cause bleeding. Concomitant use may increase risk of bleeding                                                                                                                                           |
| dabigatran + rivaroxaban             | 1 | Rivaroxaban, dabigatran. Either increases effects of the other by anticoagulation. Use Caution/Monitor. Avoid concurrent use of rivaroxaban with other anticoagulants due to increased bleeding risk other than during therapeutic transition periods where patients should be observed closely. Monitor for signs/symptoms of blood loss |

|                           |   |                                                                                                                                                                                                                                                                                                                                                                            |
|---------------------------|---|----------------------------------------------------------------------------------------------------------------------------------------------------------------------------------------------------------------------------------------------------------------------------------------------------------------------------------------------------------------------------|
| diclofenac + levofloxacin | 1 | Levofloxacin, diclofenac. Other (see comment). Modify Therapy/Monitor Closely. Comment: Risk of CNS stimulation/seizure. Mechanism: Displacement of GABA from receptors in brain                                                                                                                                                                                           |
| diclofenac + perindopril  | 1 | Diclofenac, perindopril. pharmacodynamic antagonism. Avoid or Use Alternate Drug. Co-administration may result in a significant decrease in renal function. NSAIDs may diminish the antihypertensive effect of ACE inhibitors. The mechanism of these interactions is likely related to the ability of NSAIDs to reduce the synthesis of vasodilating renal prostaglandins |
| diclofenac + rivaroxaban  | 1 | Rivaroxaban, diclofenac. Other (see comment). Use Caution/Monitor. Comment: NSAIDs are known to increase bleeding. Bleeding risk may be increased when NSAIDs are used concomitantly with rivaroxaban. Monitor for signs/symptoms of blood loss                                                                                                                            |
| digoxin + esomeprazole    | 1 | Esomeprazole will increase the level or effect of digoxin by increasing gastric pH. Applies only to oral form of both agents. Avoid or Use Alternate Drug                                                                                                                                                                                                                  |
| digoxin + lisinopril      | 1 | Lisinopril increases levels of digoxin by unspecified interaction mechanism. Use Caution/Monitor                                                                                                                                                                                                                                                                           |
| digoxin + omeprazole      | 1 | Omeprazole will increase the level or effect of digoxin by increasing gastric pH. Applies only to oral form of both agents. Avoid or Use Alternate Drug                                                                                                                                                                                                                    |
| digoxin + valsartan       | 1 | Valsartan will increase the level or effect of digoxin by decreasing renal clearance. Use Caution/Monitor. Monitor digoxin levels closely when co-administered with drugs that may decrease glomerular filtration or tubular secretion                                                                                                                                     |
| diltiazem + magnesium     | 1 | Magnesium supplement, diltiazem. Either increases toxicity of the other by pharmacodynamic synergism. Use Caution/Monitor. Calcium channel blockers may increase toxic effects of magnesium; magnesium may increase hypotensive effects of calcium channel blockers                                                                                                        |
| doxazosin + bisoprolol    | 1 | Doxazosin and bisoprolol both increase anti-hypertensive channel blocking. Modify Therapy/Monitor Closely                                                                                                                                                                                                                                                                  |
| doxazosin + metoprolol    | 1 | Doxazosin and metoprolol both increase anti-hypertensive channel blocking. Modify Therapy/Monitor Closely                                                                                                                                                                                                                                                                  |
| doxazosin + nifedipine    | 1 | Doxazosin and nifedipine both increase anti-hypertensive channel blocking. Use Caution/Monitor                                                                                                                                                                                                                                                                             |
| enalapril + enoxaparin    | 1 | Enoxaparin increases toxicity of enalapril by Other (see comment). Use Caution/Monitor. Comment: Low molecular weight heparins may suppress adrenal aldosterone secretion, which can potentially cause hyperkalemia                                                                                                                                                        |
| enalapril + insulin       | 1 | Enalapril increases effects of insulin lispro by pharmacodynamic synergism. Use Caution/Monitor                                                                                                                                                                                                                                                                            |
| enalapril + torsemide     | 1 | Enalapril, torsemide. Mechanism: pharmacodynamic synergism. Use Caution/Monitor. Risk of acute hypotension, renal insufficiency                                                                                                                                                                                                                                            |
| eplerenone + ramipril     | 1 | Ramipril, eplerenone. Mechanism: pharmacodynamic synergism. Use Caution/Monitor. Risk of hyperkalemia                                                                                                                                                                                                                                                                      |
| felodipine + metoprolol   | 1 | Metoprolol and felodipine both increase anti-hypertensive channel blocking.                                                                                                                                                                                                                                                                                                |

| Modify Therapy/Monitor Closely    |   |                                                                                                                                                                                                                                                                                                                                                                                                                             |
|-----------------------------------|---|-----------------------------------------------------------------------------------------------------------------------------------------------------------------------------------------------------------------------------------------------------------------------------------------------------------------------------------------------------------------------------------------------------------------------------|
| formoterol + furosemide           | 1 | Formoterol and furosemide both decrease serum potassium. Use Caution/Monitor                                                                                                                                                                                                                                                                                                                                                |
| furosemide + indapamide           | 1 | Furosemide and indapamide both decrease serum potassium. Use Caution/Monitor                                                                                                                                                                                                                                                                                                                                                |
| furosemide + meloxicam            | 1 | Meloxicam increases and furosemide decreases serum potassium. Effect of interaction is not clear, use caution. Use Caution/Monitor                                                                                                                                                                                                                                                                                          |
| furosemide + torsemide            | 1 | Furosemide and torsemide both decrease serum potassium. Use Caution/Monitor                                                                                                                                                                                                                                                                                                                                                 |
| heparin + ketorolac               | 1 | Heparin and ketorolac both increase anticoagulation. Modify Therapy/Monitor Closely                                                                                                                                                                                                                                                                                                                                         |
| heparin + meloxicam               | 1 | Heparin and meloxicam both increase anticoagulation. Modify Therapy/Monitor Closely                                                                                                                                                                                                                                                                                                                                         |
| hydrochlorothiazide + telmisartan | 1 | Telmisartan increases and hydrochlorothiazide decreases serum potassium. Effect of interaction is not clear, use caution. Use Caution/Monitor                                                                                                                                                                                                                                                                               |
| hydrochlorothiazide + valsartan   | 1 | Valsartan increases and hydrochlorothiazide decreases serum potassium. Effect of interaction is not clear, use caution. Use Caution/Monitor                                                                                                                                                                                                                                                                                 |
| ibuprofen + indapamide            | 1 | Ibuprofen increases and indapamide decreases serum potassium. Effect of interaction is not clear, use caution. Use Caution/Monitor                                                                                                                                                                                                                                                                                          |
| ibuprofen + lisinopril            | 1 | ibuprofen, lisinopril. pharmacodynamic antagonism. Avoid or Use Alternate Drug. Co-administration may result in a significant decrease in renal function. NSAIDs may diminish the antihypertensive effect of ACE inhibitors. The mechanism of these interactions is likely related to the ability of NSAIDs to reduce the synthesis of vasodilating renal prostaglandins                                                    |
| ibuprofen + prednisolone          | 1 | Ibuprofen, prednisolone. Either increases toxicity of the other by pharmacodynamic synergism. Use Caution/Monitor. Increased risk of GI ulceration                                                                                                                                                                                                                                                                          |
| indapamide + valsartan            | 1 | Valsartan increases and indapamide decreases serum potassium. Effect of interaction is not clear, use caution. Use Caution/Monitor                                                                                                                                                                                                                                                                                          |
| interferon alfa 2b + warfarin     | 1 | Interferon alfa 2b increases effects of warfarin by unspecified interaction mechanism. Use Caution/Monitor                                                                                                                                                                                                                                                                                                                  |
| ivabradine + metoprolol           | 1 | Ivabradine, metoprolol. Either increases effects of the other by pharmacodynamic synergism. Modify Therapy/Monitor Closely. Most patients receiving ivabradine will also be treated with a beta-blocker. The risk of bradycardia increases with co-administration of drugs that slow heart rate (eg, digoxin, amiodarone, beta-blockers). Monitor heart rate in patients taking ivabradine with other negative chronotropes |
| ketoprofen + ramipril             | 1 | Ketoprofen, ramipril. pharmacodynamic antagonism. Avoid or Use Alternate Drug. Co-administration may result in a significant decrease in renal function. NSAIDs may diminish the antihypertensive effect of ACE inhibitors. The mechanism of these interactions is likely related to the ability of NSAIDs to reduce the synthesis of vasodilating renal prostaglandins                                                     |
| lisinopril + potassium            | 1 | Lisinopril increases levels of potassium chloride by decreasing elimination.                                                                                                                                                                                                                                                                                                                                                |

|                                |   |                                                                                                                                                                                                                                                                                                                    |
|--------------------------------|---|--------------------------------------------------------------------------------------------------------------------------------------------------------------------------------------------------------------------------------------------------------------------------------------------------------------------|
|                                |   | Use Caution/Monitor. Risk of hyperkalemia                                                                                                                                                                                                                                                                          |
| loratadine + metronidazole     | 1 | Metronidazole will increase the level or effect of loratadine by affecting hepatic/intestinal enzyme CYP3A4 metabolism. Use Caution/Monitor                                                                                                                                                                        |
| loratadine + nifedipine        | 1 | Nifedipine will increase the level or effect of loratadine by affecting hepatic/intestinal enzyme CYP3A4 metabolism. Use Caution/Monitor                                                                                                                                                                           |
| lornoxicam + losartan          | 1 | Losartan and lornoxicam both increase serum potassium. Use Caution/Monitor                                                                                                                                                                                                                                         |
| losartan + tizanidine          | 1 | Tizanidine increases effects of losartan by pharmacodynamic synergism. Use Caution/Monitor. Risk of hypotension                                                                                                                                                                                                    |
| magnesium + nifedipine         | 1 | Magnesium supplement, nifedipine. Either increases toxicity of the other by Other (see comment). Use Caution/Monitor. Comment: Calcium channel blockers may increase toxic effects of magnesium; magnesium may increase hypotensive effects of calcium channel blockers                                            |
| magnesium + potassium          | 1 | Magnesium supplement will decrease the level or effect of potassium phosphate by Other (see comment). Modify Therapy/Monitor Closely. Drug may form a chelate with divalent cations; may decrease absorption by the intestinal tract; applies to oral forms; separate administration of drugs to avoid interaction |
| meloxicam + torsemide          | 1 | Meloxicam increases and torsemide decreases serum potassium. Effect of interaction is not clear, use caution. Use Caution/Monitor                                                                                                                                                                                  |
| metformin + ramipril           | 1 | Ramipril increases toxicity of metformin by unspecified interaction mechanism. Use Caution/Monitor. Increases risk for hypoglycemia and lactic acidosis                                                                                                                                                            |
| metoprolol + potassium         | 1 | Metoprolol and potassium chloride both increase serum potassium. Modify Therapy/Monitor Closely                                                                                                                                                                                                                    |
| metoprolol + propafenone       | 1 | Propafenone will increase the level or effect of metoprolol by affecting hepatic enzyme CYP2D6 metabolism. Use Caution/Monitor. If concurrent therapy is required, monitor cardiac function carefully, particularly blood pressure. A dosage adjustment for the beta blocker may be required                       |
| nitroglycerin + verapamil      | 1 | Verapamil, nitroglycerin sublingual. Either increases toxicity of the other by additive vasodilation. Modify Therapy/Monitor Closely. Marked orthostatic hypotension reported with concomitant use                                                                                                                 |
| olodaterol inhaled + torsemide | 1 | Torsemide and olodaterol inhaled both decrease serum potassium. Use Caution/Monitor                                                                                                                                                                                                                                |
| pitavastatin + telmisartan     | 1 | Telmisartan increases toxicity of pitavastatin by Other (see comment). Use Caution/Monitor. Comment: OATP1B1 inhibitors may increase risk of myopathy                                                                                                                                                              |
| potassium + torsemide          | 1 | Potassium chloride increases and torsemide decreases serum potassium. Effect of interaction is not clear, use caution. Modify Therapy/Monitor Closely                                                                                                                                                              |
| potassium + indapamide         | 1 | Potassium chloride increases and indapamide decreases serum potassium. Effect of interaction is not clear, use caution. Modify Therapy/Monitor Closely                                                                                                                                                             |
| tiotropium + umeclidinium bro- | 1 | Umeclidinium bromide and tiotropium both decrease cholinergic ef-                                                                                                                                                                                                                                                  |

---

|      |                                                                                                                    |
|------|--------------------------------------------------------------------------------------------------------------------|
| mide | fects/transmission. Use Caution/Monitor. If possible, avoid co-administration of additional anticholinergic agents |
|------|--------------------------------------------------------------------------------------------------------------------|

---

**\*Note:** Impact of drug-drug interactions associated with the combinations 'aspirin + captopril' and 'aspirin + enalapril' may be considered insignificant due to the use of low-dose aspirin in the majority of cases. Administration of aspirin at doses less than 300 mg per day has little effect on the effectiveness of captopril and enalapril. Administration of aspirin in higher doses reduces the effectiveness of captopril and enalapril.



**Table S7.** The detailed explanation of the entire list of pairwise minor drug-drug interactions among prescribed drugs in the cohort of cardiovascular patients based on data of electronic health records in 2019–2022 ( $n = 704$ ).

| Drug combination                     | n  | Minor drug-drug interactions (P-List)                                                                                                                                                                                                                        |
|--------------------------------------|----|--------------------------------------------------------------------------------------------------------------------------------------------------------------------------------------------------------------------------------------------------------------|
| aspirin + indapamide                 | 30 | Indapamide will increase the level or effect of aspirin by acidic (anionic) drug competition for renal tubular clearance. Minor/ Significance Unknown                                                                                                        |
| clopidogrel + torsemide              | 27 | Clopidogrel increases levels of torsemide by decreasing metabolism. Minor/ Significance Unknown                                                                                                                                                              |
| hydrochlorothiazide + metformin      | 16 | Hydrochlorothiazide decreases effects of metformin by pharmacodynamic antagonism. Minor/ Significance Unknown. Thiazide dosage >50 mg/ day may increase blood glucose                                                                                        |
| aspirin + hydrochlorothiazide        | 13 | Hydrochlorothiazide will increase the level or effect of aspirin by acidic (anionic) drug competition for renal tubular clearance. Minor/ Significance Unknown                                                                                               |
| ascorbic acid + aspirin              | 12 | Ascorbic acid will increase the level or effect of aspirin by acidic (anionic) drug competition for renal tubular clearance. Minor/Significance Unknown. ascorbic acid increases levels of aspirin by decreasing renal clearance. Minor/Significance Unknown |
| indapamide + magnesium hydroxide     | 10 | Indapamide decreases levels of magnesium hydroxide by increasing renal clearance. Minor/Significance Unknown                                                                                                                                                 |
| carvedilol + omeprazole              | 8  | Omeprazole will increase the level or effect of carvedilol by affecting hepatic enzyme CYP2C9/10 metabolism. Minor/Significance Unknown                                                                                                                      |
| indapamide + metformin               | 8  | Indapamide decreases effects of metformin by pharmacodynamic antagonism. Minor/Significance Unknown. Thiazide dosage >50 mg/day may increase blood glucose                                                                                                   |
| magnesium hydroxide + torsemide      | 7  | Torsemide decreases levels of magnesium hydroxide by increasing renal clearance. Minor/Significance Unknown                                                                                                                                                  |
| aspirin + furosemide                 | 6  | Aspirin decreases effects of furosemide by pharmacodynamic antagonism. Minor/Significance Unknown. NSAIDs decrease prostaglandin synthesis                                                                                                                   |
| budesonide + torsemide               | 6  | Budesonide, torsemide. Mechanism: pharmacodynamic synergism. Minor/Significance Unknown. Risk of hypokalemia, especially with strong glucocorticoid activity                                                                                                 |
| indapamide + magnesium               | 6  | Indapamide decreases levels of magnesium chloride by increasing renal clearance. Minor/Significance Unknown                                                                                                                                                  |
| magnesium hydroxide + spironolactone | 6  | Spironolactone increases levels of magnesium hydroxide by decreasing renal clearance. Minor/Significance Unknown                                                                                                                                             |
| aspirin + eplerenone                 | 4  | Aspirin decreases effects of eplerenone by pharmacodynamic antagonism. Minor/Significance Unknown. NSAIDs decrease prostaglandin synthesis                                                                                                                   |
| atorvastatin + coenzyme Q10          | 4  | Atorvastatin decreases levels of coenzyme Q10 by unspecified interaction mechanism. Minor/ Significance Unknown                                                                                                                                              |
| formoterol + torsemide               | 4  | Formoterol, torsemide. Mechanism: pharmacodynamic synergism. Minor/ Significance Unknown. Hypokalemia                                                                                                                                                        |

|                                       |   |                                                                                                                                                                                                                                                                                                   |
|---------------------------------------|---|---------------------------------------------------------------------------------------------------------------------------------------------------------------------------------------------------------------------------------------------------------------------------------------------------|
| furosemide + metformin                | 4 | Furosemide increases levels of metformin by unspecified interaction mechanism. Minor/Significance Unknown. Patient should be closely observed for loss of blood glucose control; when drugs are withdrawn from a patient receiving metformin, patient should be observed closely for hypoglycemia |
| aspirin + chlorthalidone              | 3 | Aspirin increases and chlorthalidone decreases serum potassium. Effect of interaction is not clear, use caution. Use Caution/Monitor                                                                                                                                                              |
| bisoprolol + tizanidine               | 3 | Tizanidine increases effects of bisoprolol by pharmacodynamic synergism. Minor/Significance Unknown. Risk of hypotension                                                                                                                                                                          |
| calcium carbonate + aspirin           | 3 | Calcium carbonate, aspirin. Mechanism: passive renal tubular reabsorption due to increased pH. Minor/Significance Unknown. Salicylate levels increased at moderate doses; salicylate levels decreased at large doses (d/t increased renal excretion of unchanged salicylic acid)                  |
| captopril + tizanidine                | 3 | Tizanidine increases effects of captopril by pharmacodynamic synergism. Minor/Significance Unknown. Risk of hypotension                                                                                                                                                                           |
| B12 + omeprazole                      | 3 | Omeprazole decreases levels of cyanocobalamin by inhibition of GI absorption. Applies only to oral form of both agents. Minor/Significance Unknown                                                                                                                                                |
| hydrochlorothiazide + magnesium       | 3 | Hydrochlorothiazide decreases levels of magnesium hydroxide by increasing renal clearance. Minor/Significance Unknown                                                                                                                                                                             |
| amiodarone + loratadine               | 2 | Amiodarone will increase the level or effect of loratadine by affecting hepatic enzyme CYP2D6 metabolism. Minor/ Significance Unknown. amiodarone will increase the level or effect of loratadine by P-glycoprotein (MDR1) efflux transporter. Minor/ Significance Unknown                        |
| amlodipine + tizanidine               | 2 | Tizanidine increases effects of amlodipine by pharmacodynamic synergism. Minor/Significance Unknown. Risk of hypotension                                                                                                                                                                          |
| aspirin + ibuprofen                   | 2 | Aspirin will increase the level or effect of ibuprofen by acidic (anionic) drug competition for renal tubular clearance. Minor/ Significance Unknown                                                                                                                                              |
| aspirin + meloxicam                   | 2 | Aspirin will increase the level or effect of meloxicam by acidic (anionic) drug competition for renal tubular clearance. Minor/Significance Unknown                                                                                                                                               |
| captopril + tamsulosin                | 2 | Aspirin will increase the level or effect of meloxicam by acidic (anionic) drug competition for renal tubular clearance. Minor/Significance Unknown                                                                                                                                               |
| chlorthalidone + magnesium hydroxide  | 2 | Chlorthalidone decreases levels of magnesium hydroxide by increasing renal clearance. Minor/Significance Unknown                                                                                                                                                                                  |
| choline magnesium trisalicylate + B12 | 2 | Choline magnesium trisalicylate decreases levels of cyanocobalamin by inhibition of GI absorption. Applies only to oral form of both agents. Minor/ Significance Unknown                                                                                                                          |
| B12 + gabapentin                      | 2 | Gabapentin decreases levels of cyanocobalamin by inhibition of GI absorption. Applies only to oral form of both agents. Minor/ Significance Unknown                                                                                                                                               |
| B12 + metformin                       | 2 | Metformin decreases levels of cyanocobalamin by unspecified interaction mechanism. Minor/Significance Unknown. It may take several years of metformin therapy to develop vitamin B12 deficiency                                                                                                   |
| diclofenac + indapamide               | 2 | Indapamide will increase the level or effect of diclofenac by acidic (anionic) drug competition for renal tubular clearance. Minor/ Significance Unknown                                                                                                                                          |

|                                  |   |                                                                                                                                                               |
|----------------------------------|---|---------------------------------------------------------------------------------------------------------------------------------------------------------------|
| diclofenac + meloxicam           | 2 | Diclofenac will increase the level or effect of meloxicam by acidic (anionic) drug competition for renal tubular clearance. Minor/ Significance Unknown       |
| folic acid + metformin           | 2 | Metformin decreases levels of folic acid by unspecified interaction mechanism. Minor/Significance Unknown                                                     |
| furosemide + magnesium hydroxide | 2 | Furosemide decreases levels of magnesium hydroxide by increasing renal clearance. Minor/Significance Unknown                                                  |
| ibuprofen + meloxicam            | 2 | Ibuprofen will increase the level or effect of meloxicam by acidic (anionic) drug competition for renal tubular clearance. Minor/ Significance Unknown        |
| metformin + nifedipine           | 2 | Nifedipine increases levels of metformin by enhancing GI absorption. Applies only to oral form of both agents. Minor/Significance Unknown                     |
| metformin + potassium            | 2 | Spirolactone increases levels of magnesium hydroxide by decreasing renal clearance. Minor/Significance Unknown                                                |
| aceclofenac + aspirin            | 1 | Aceclofenac will increase the level or effect of aspirin by acidic (anionic) drug competition for renal tubular clearance. Minor/Significance Unknown         |
| aceclofenac + indapamide         | 1 | Indapamide will increase the level or effect of aceclofenac by acidic (anionic) drug competition for renal tubular clearance. Minor/Significance Unknown      |
| aceclofenac + lisinopril         | 1 | Aceclofenac decreases effects of lisinopril by pharmacodynamic antagonism. Minor/Significance Unknown. NSAIDs decrease prostaglandin synthesis                |
| amiodarone + celecoxib           | 1 | Amiodarone will increase the level or effect of celecoxib by affecting hepatic enzyme CYP2C9/10 metabolism. Minor/Significance Unknown                        |
| amiodarone + diclofenac          | 1 | Amiodarone will increase the level or effect of diclofenac by affecting hepatic enzyme CYP2C9/ 10 metabolism. Minor/ Significance Unknown                     |
| amiodarone + ibuprofen           | 1 | Amiodarone will increase the level or effect of ibuprofen by affecting hepatic enzyme CYP2C9/ 10 metabolism. Minor/ Significance Unknown                      |
| amiodarone + meloxicam           | 1 | Amiodarone will increase the level or effect of meloxicam by affecting hepatic enzyme CYP2C9/ 10 metabolism. Minor/ Significance Unknown                      |
| amiodarone + pyridoxine          | 1 | Aspirin will increase the level or effect of ketorolac by acidic (anionic) drug competition for renal tubular clearance. Minor/Significance Unknown           |
| aspirin + B12                    | 1 | Aspirin decreases levels of cyanocobalamin by inhibition of GI absorption. Applies only to oral form of both agents. Minor/Significance Unknown               |
| aspirin + ketoprofen             | 1 | Aspirin will increase the level or effect of ketoprofen by acidic (anionic) drug competition for renal tubular clearance. Minor/Significance Unknown          |
| atorvastatin + loratadine        | 1 | Atorvastatin will increase the level or effect of loratadine by P-glycoprotein (MDR1) efflux transporter. Minor/ Significance Unknown                         |
| budesonide + clarithromycin      | 1 | Budesonide will decrease the level or effect of clarithromycin by affecting hepatic/ intestinal enzyme CYP3A4 metabolism. Minor/ Significance Unknown         |
| budesonide + furosemide          | 1 | Budesonide, furosemide. Mechanism: pharmacodynamic synergism. Minor/Significance Unknown. Risk of hypokalemia, especially with strong glucocorticoid activity |
| budesonide + metformin           | 1 | Budesonide decreases effects of metformin by pharmacodynamic antagonism.                                                                                      |

|                                      |   | Minor/Significance Unknown                                                                                                                                                                                                                                                                                                                                     |
|--------------------------------------|---|----------------------------------------------------------------------------------------------------------------------------------------------------------------------------------------------------------------------------------------------------------------------------------------------------------------------------------------------------------------|
| captopril + lornoxicam               | 1 | Lornoxicam decreases effects of captopril by pharmacodynamic antagonism. Minor/Significance Unknown. NSAIDs decrease prostaglandin synthesis                                                                                                                                                                                                                   |
| celecoxib + indapamide               | 1 | Indapamide will increase the level or effect of celecoxib by acidic (anionic) drug competition for renal tubular clearance. Minor/Significance Unknown                                                                                                                                                                                                         |
| celecoxib + meloxicam                | 1 | Celecoxib will increase the level or effect of meloxicam by acidic (anionic) drug competition for renal tubular clearance. Minor/Significance Unknown                                                                                                                                                                                                          |
| chlorthalidone + hydrochlorothiazide | 1 | Chlorthalidone will increase the level or effect of hydrochlorothiazide by acidic (anionic) drug competition for renal tubular clearance. Minor/Significance Unknown                                                                                                                                                                                           |
| chlorthalidone + meloxicam           | 1 | Chlorthalidone will increase the level or effect of meloxicam by acidic (anionic) drug competition for renal tubular clearance. Minor/Significance Unknown                                                                                                                                                                                                     |
| chlorthalidone + metformin           | 1 | Chlorthalidone decreases effects of metformin by pharmacodynamic antagonism. Minor/Significance Unknown. Thiazide dosage >50 mg/day may increase blood glucose                                                                                                                                                                                                 |
| chlorthalidone + tizanidine          | 1 | Tizanidine increases effects of chlorthalidone by pharmacodynamic synergism. Minor/Significance Unknown. Risk of hypotension                                                                                                                                                                                                                                   |
| clarithromycin + apixaban            | 1 | Clarithromycin will increase the level or effect of apixaban by affecting hepatic/ intestinal enzyme CYP3A4 metabolism. Minor/Significance Unknown. Although clarithromycin is a combined P-gp and strong CYP3A4 inhibitor, the manufacturer has stated that pharmacokinetic data suggest that no dose adjustment is necessary with concomitant administration |
| diclofenac + flurbiprofen            | 1 | Diclofenac will increase the level or effect of flurbiprofen by acidic (anionic) drug competition for renal tubular clearance. Minor/Significance Unknown                                                                                                                                                                                                      |
| diclofenac + lornoxicam              | 1 | Diclofenac will increase the level or effect of lornoxicam by acidic (anionic) drug competition for renal tubular clearance. Minor/Significance Unknown                                                                                                                                                                                                        |
| folic acid + methotrexate            | 1 | Folic acid decreases effects of methotrexate by pharmacodynamic antagonism. Minor/Significance Unknown. Vitamin preparations containing folic acid or its derivatives may decrease responses to systemically administered methotrexate                                                                                                                         |
| formoterol + furosemide              | 1 | Formoterol, furosemide. Mechanism: pharmacodynamic synergism. Minor/Significance Unknown. Hypokalemia                                                                                                                                                                                                                                                          |
| furosemide + folic acid              | 1 | Furosemide decreases levels of folic acid by increasing renal clearance. Minor/Significance Unknown                                                                                                                                                                                                                                                            |
| furosemide + meloxicam               | 1 | Meloxicam decreases effects of furosemide by pharmacodynamic antagonism. Minor/Significance Unknown. NSAIDs decrease prostaglandin synthesis                                                                                                                                                                                                                   |
| ibuprofen + indapamide               | 1 | Indapamide will increase the level or effect of ibuprofen by acidic (anionic) drug competition for renal tubular clearance. Minor/Significance Unknown                                                                                                                                                                                                         |
| indapamide + meloxicam               | 1 | Indapamide will increase the level or effect of meloxicam by acidic (anionic) drug competition for renal tubular clearance. Minor/Significance Unknown                                                                                                                                                                                                         |
| indapamide + tizanidine              | 1 | Tizanidine increases effects of indapamide by pharmacodynamic synergism.                                                                                                                                                                                                                                                                                       |

|                             |   |                                                                                                                                                                                                     |
|-----------------------------|---|-----------------------------------------------------------------------------------------------------------------------------------------------------------------------------------------------------|
|                             |   | Minor/Significance Unknown. Risk of hypotension                                                                                                                                                     |
| levothyroxine + omeprazole  | 1 | Omeprazole decreases levels of levothyroxine by increasing gastric pH. Applies only to oral form of both agents. Minor/Significance Unknown. Conflicting evidence regarding this interaction exists |
| lisinopril + tizanidine     | 1 | Tizanidine increases effects of lisinopril by pharmacodynamic synergism. Minor/Significance Unknown. Risk of hypotension                                                                            |
| loratadine + nifedipine     | 1 | Nifedipine will decrease the level or effect of loratadine by P-glycoprotein (MDR1) efflux transporter. Minor/ Significance Unknown                                                                 |
| magnesium + torsemide       | 1 | Torsemide decreases levels of magnesium hydroxide by increasing renal clearance. Minor/Significance Unknown                                                                                         |
| meloxicam + naproxen        | 1 | Meloxicam will increase the level or effect of naproxen by acidic (anionic) drug competition for renal tubular clearance. Minor/ Significance Unknown                                               |
| omeprazole + tizanidine     | 1 | Omeprazole will decrease the level or effect of tizanidine by affecting hepatic enzyme CYP1A2 metabolism. Minor/Significance Unknown                                                                |
| potassium + vildagliptin    | 1 | Potassium chloride increases effects of vildagliptin by pharmacodynamic synergism. Minor/ Significance Unknown. Interaction especially seen in the treatment of hypokalemia                         |
| spironolactone + tizanidine | 1 | Tizanidine increases effects of spironolactone by pharmacodynamic synergism. Minor/Significance Unknown. Risk of hypotension                                                                        |
| tizanidine + torsemide      | 1 | Tizanidine increases effects of torsemide by pharmacodynamic synergism. Minor/Significance Unknown. Risk of hypotension                                                                             |

**\*Note:** Impact of drug-drug interactions associated with the combinations 'aspirin + captopril' and 'aspirin + enalapril' may be considered insignificant due to the use of low-dose aspirin in the majority of cases. Administration of aspirin at doses less than 300 mg per day has little effect on the effectiveness of captopril and enalapril. Administration of aspirin in higher doses reduces the effectiveness of captopril and enalapril.
